# Supplementary material
Source: Research Square preprint supplement (doi:10.21203/rs.3.rs-9684666/v1)
Supplement: Supplementary file 1 [file 130e3cb08d7739c4b6edcc1c.docx]

**Supporting Information**

TEXT-I

**Sustainable Utilization of Biomass-Derived Biochar for Asphalt Modification: Multiscale Experimental and Theoretical Insights**

Meili Liua, Shaocheng Shenb, Kun Wangb,c, Fuwu Zhangb, Xianming Shia,*

*a Civil and Architectural Engineering, University of Miami, Coral Gables, Florida 33146, USA*

*b Department of Chemistry, University of Miami, Coral Gables, Florida 33146, USA*

*c Department of Physics, University of Miami, Coral Gables, Florida 33146, USA*

*: Corresponding authors

E-mail address: [xxs784@miami.edu](mailto:xxs784@miami.edu)

**Table of Contents**

[**Fig. S1.** Schematic illustration of the preparation procedure for the WS-biochar sample using the standard operating procedure (SOP) for grinding biochar S4](#_Toc224215279)

[**Fig. S2.** Particle size distribution (PSD) of WS-biochar samples S5](#_Toc224215280)

[**Fig. S3.** (a) The full-width-at-half-maximum (FWHM) values of the X-ray diffraction (XRD) C(002) peak and (b) the corresponding calculated dislocation densities for biochar-doped asphalt samples S6](#_Toc224215281)

[**Fig. S4.** AFM images at 5 μm scan range of the PG70-10 asphalt with biochar doping levels of (a) 0 wt%, (b) 2 wt%, (c) 4 wt%, (d) 6 wt%, (e) 8 wt% and (f) 10 wt% S7](#_Toc224215282)

[**Fig. S5.** Electrostatic potentials (ESP) on the molecular vdW surface (a), Molecular orbital energies and calculated HOMO-LUMO energy gap (b) of WS-biochar S8](#_Toc224215283)

[**Fig. S6.** Electrostatic potentials (ESP) on the molecular vdW surface of WS-biochar doped asphalt molecules S9](#_Toc224215284)

[**Fig. S7.** Molecular orbital energies and calculated HOMO-LUMO energy gap of twelve asphalt molecules S10](#_Toc224215285)

[**Fig. S8.** Molecular orbital energies and calculated HOMO-LUMO energy gap of WS-biochar doped asphalt systems S11](#_Toc224215286)

[**Fig. S9.** Optimized geometries of WS-biochar-doped asphalt systems S12](#_Toc224215287)

[**Table S1.** Physical and chemical properties of biochar sample before grinding S13](#_Toc224215288)

[**Table S2.** The X-ray photoelectron spectroscopy (XPS) analysis on element compositions of the WS-Biochar S14](#_Toc224215289)

[**Table S3.** The X-ray photoelectron spectroscopy (XPS) analysis on C1s and O1s of the WS-Biochar S15](#_Toc224215290)

[**Table S4**. Summary of WS-biochar Model Features. S16](#_Toc224215291)

[**Table S5.** The full-width-at-half-maximum (FWHM) values of the X-ray diffraction (XRD) C(002) peak and calculated dislocation densities for all the samples of biochar doped asphalt S17](#_Toc224215292)

[**Table. S6.** Statistical analysis of mechanical properties and coefficient of variation for all the samples of biochar doped asphalt S18](#_Toc224215293)

[**Table. S7.** Statistical analysis of mechanical properties of the microstructures for all the samples of biochar doped asphalt S19](#_Toc224215294)

[**Table. S8.** Mechanical properties’ coefficient of variation (CV) of the microstructures for all the samples of biochar doped asphalt S20](#_Toc224215295)

[**Table S9.** HOMO-LUMO energy gaps of twelve asphalt molecules and their corresponding WS-biochar-asphalt complexes calculated by DFT S21](#_Toc224215296)

[**Table S10.** Calculated dipole moments of representative asphalt molecules and their corresponding WS-biochar-asphalt complexes obtained from DFT calculations S22](#_Toc224215297)

**Preparation of WS-biochar sample**

The standard operating procedure (SOP) for obtaining the ground biochar includes four steps. The first step is to weigh 250 grams of raw biochar, place it in the grinder, and close the lid by tightening all the three bolts. The second step is turning the switch of the grinder on and start the countdown of grinding time simultaneously. The third step is to turn off the grinder and collect the ground biochar in a Ziploc bag with a soft brush after waiting for two minutes for the settle down of tiny particles.

**
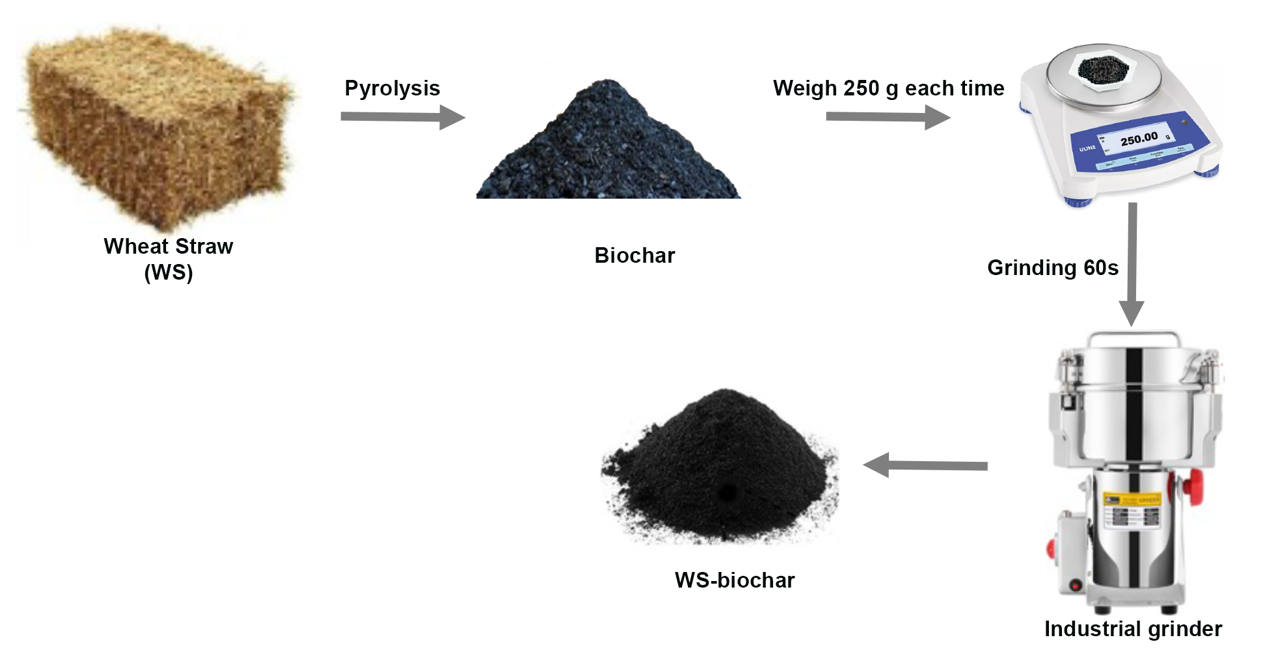
**

**Fig. S1.** Schematic illustration of the preparation procedure for the WS-biochar sample using the standard operating procedure (SOP) for grinding biochar.

**
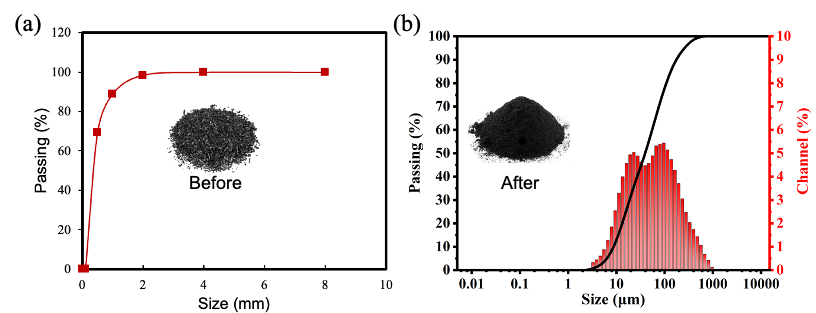
**

**Fig. S2.** Particle size distribution (PSD) of WS-biochar samples. (a) PSD before grinding, tested as part of the International Biochar Initiative (IBI) Laboratory Tests for Certification Program, conducted by Control Laboratories, Watsonville, CA 95076, USA ([www.biocharlab.com](http://www.biocharlab.com)). (b) PSD after grinding, using the Microtrac S3500.

**Calculations of FWHM and dislocation density from XRD data**

The dislocation density (δ) was estimated from the full width at half maximum (FWHM)[1,2] of the C(002) diffraction peak using the Scherrer equation to obtain the crystallite size (D):

where *K* is the shape factor (taken as 0.9), *λ* is the X-ray wavelength of Cu Kα radiation (1.5406 Å), β is the FWHM (in radians) corrected for instrumental broadening, and *θ* is the Bragg angle (≈13.25° for the C(002) reflection at 2*θ* ≈ 26.5°).

The dislocation density[3–5] was then approximated using the Williamson-Smallman[6] relation:

This approach provides an upper-limit estimate of dislocation density if instrumental broadening is not subtracted.


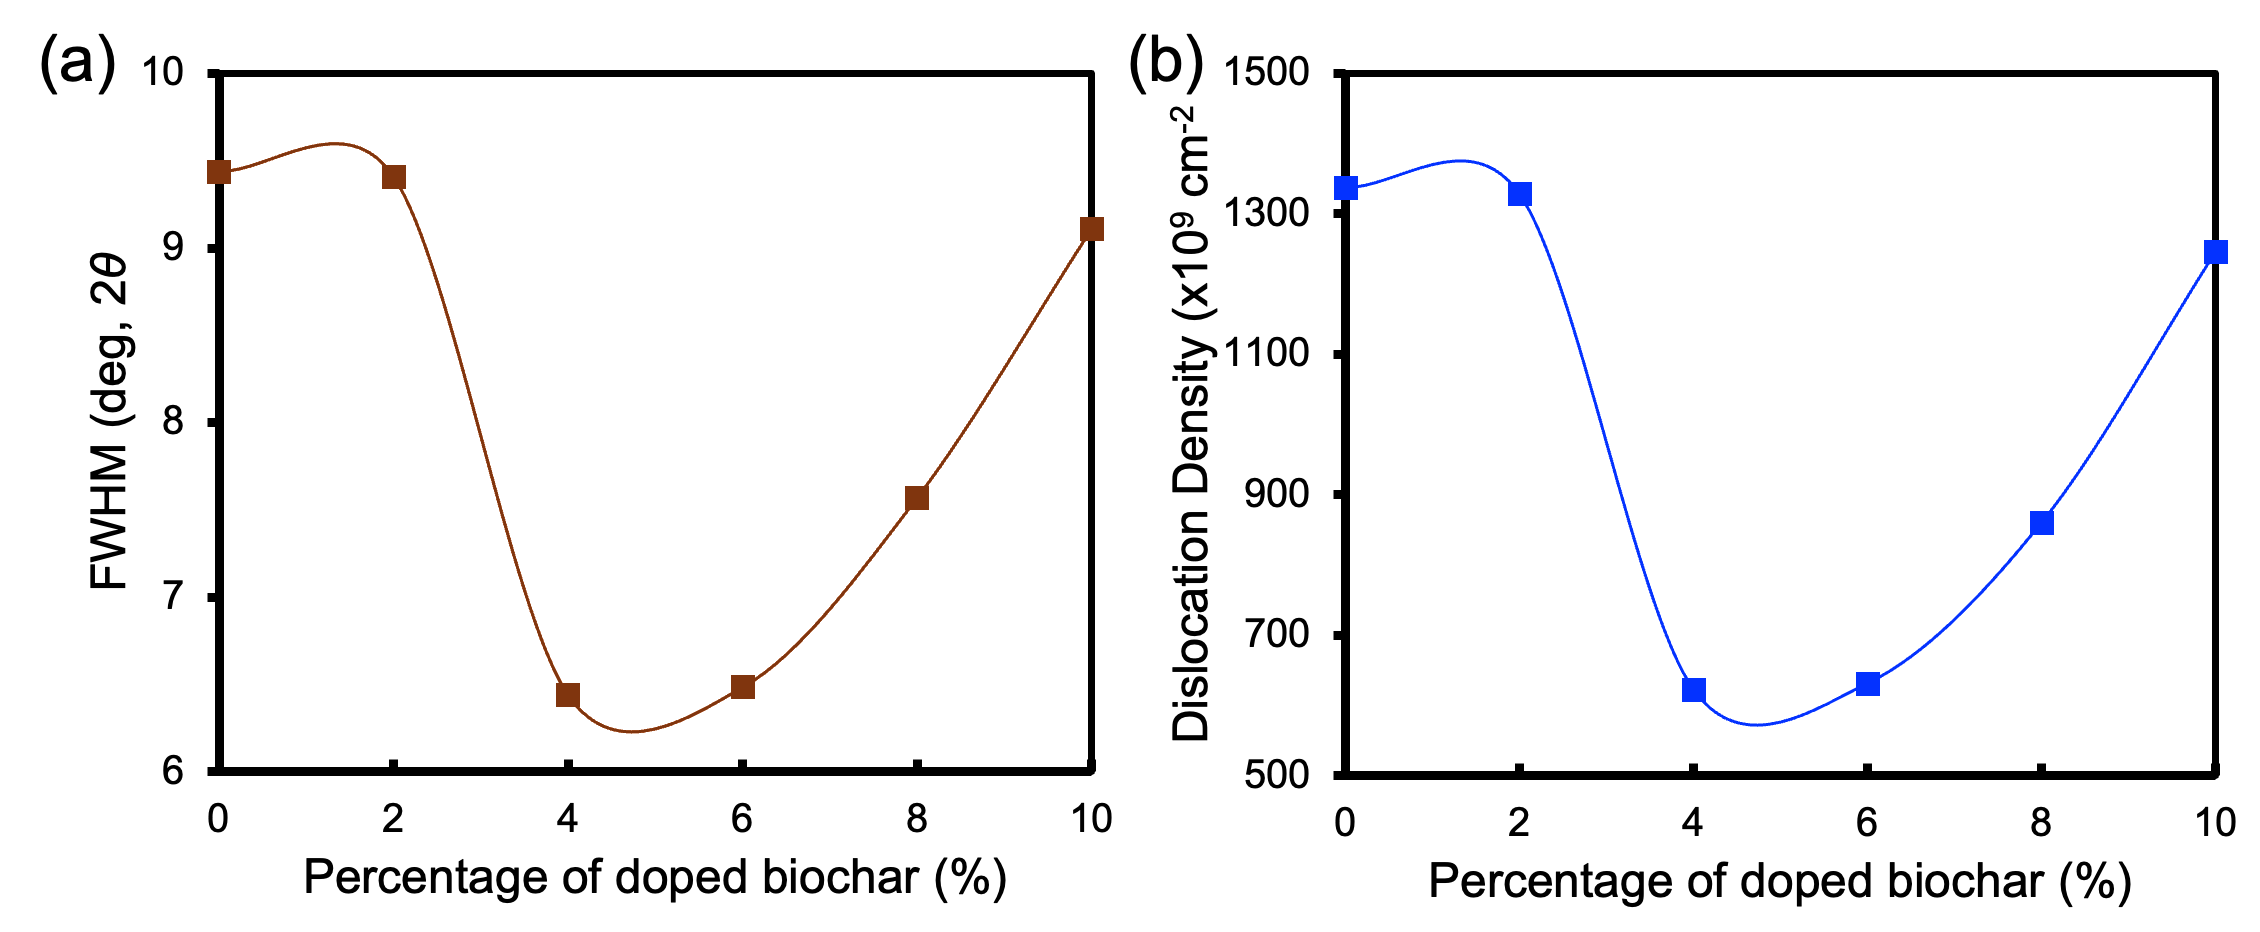


**Fig. S3.** (a) The full-width-at-half-maximum (FWHM) values of the X-ray diffraction (XRD) C(002) peak and (b) the corresponding calculated dislocation densities for biochar-doped asphalt samples.


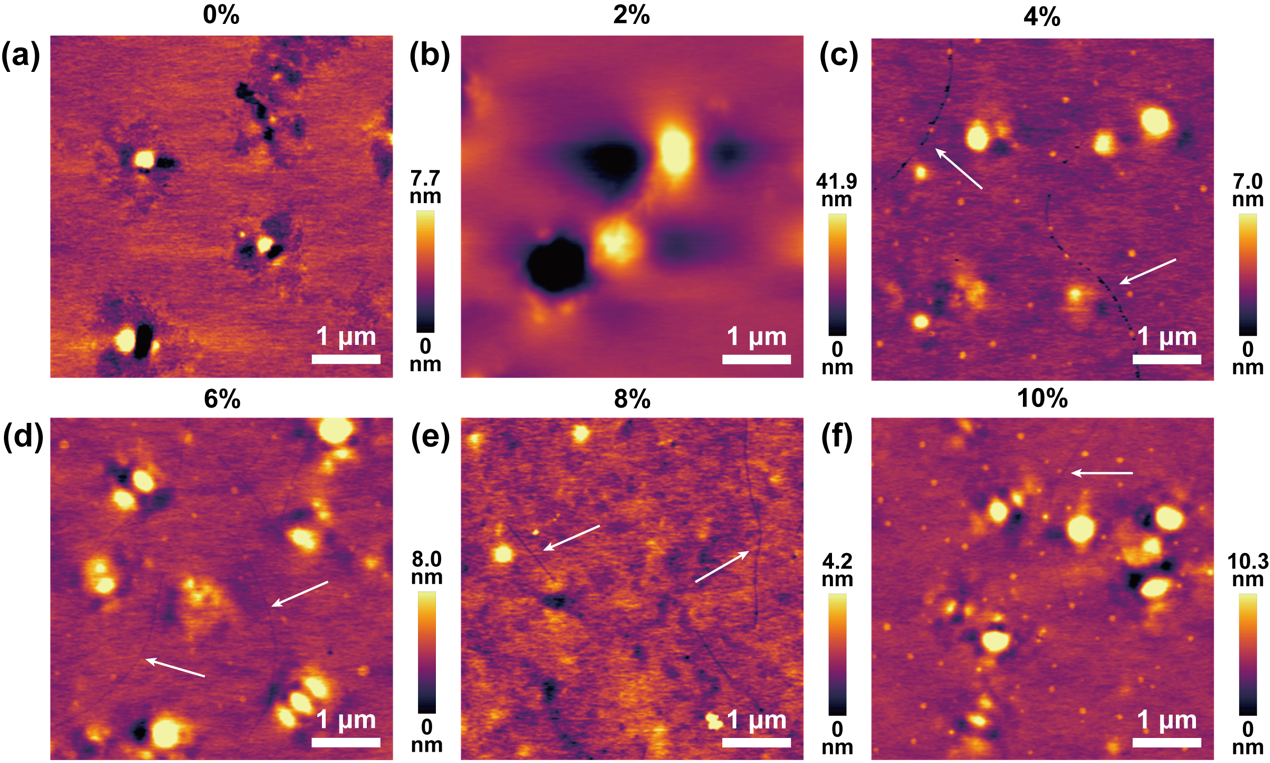


**Fig. S4.** AFM images at 5 μm scan range of the PG70-10 asphalt with biochar doping levels of (a) 0 wt%, (b) 2 wt%, (c) 4 wt%, (d) 6 wt%, (e) 8 wt% and (f) 10 wt%.

**
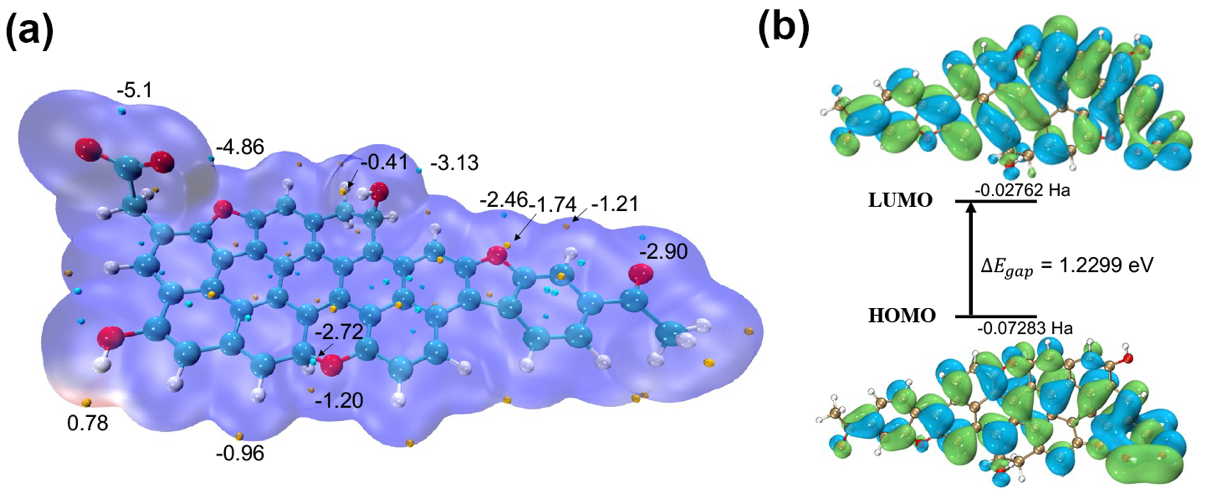
**

**Fig. S5.** Electrostatic potentials (ESP) on the molecular vdW surface (a), Molecular orbital energies and calculated HOMO-LUMO energy gap (b) of WS-biochar.

**
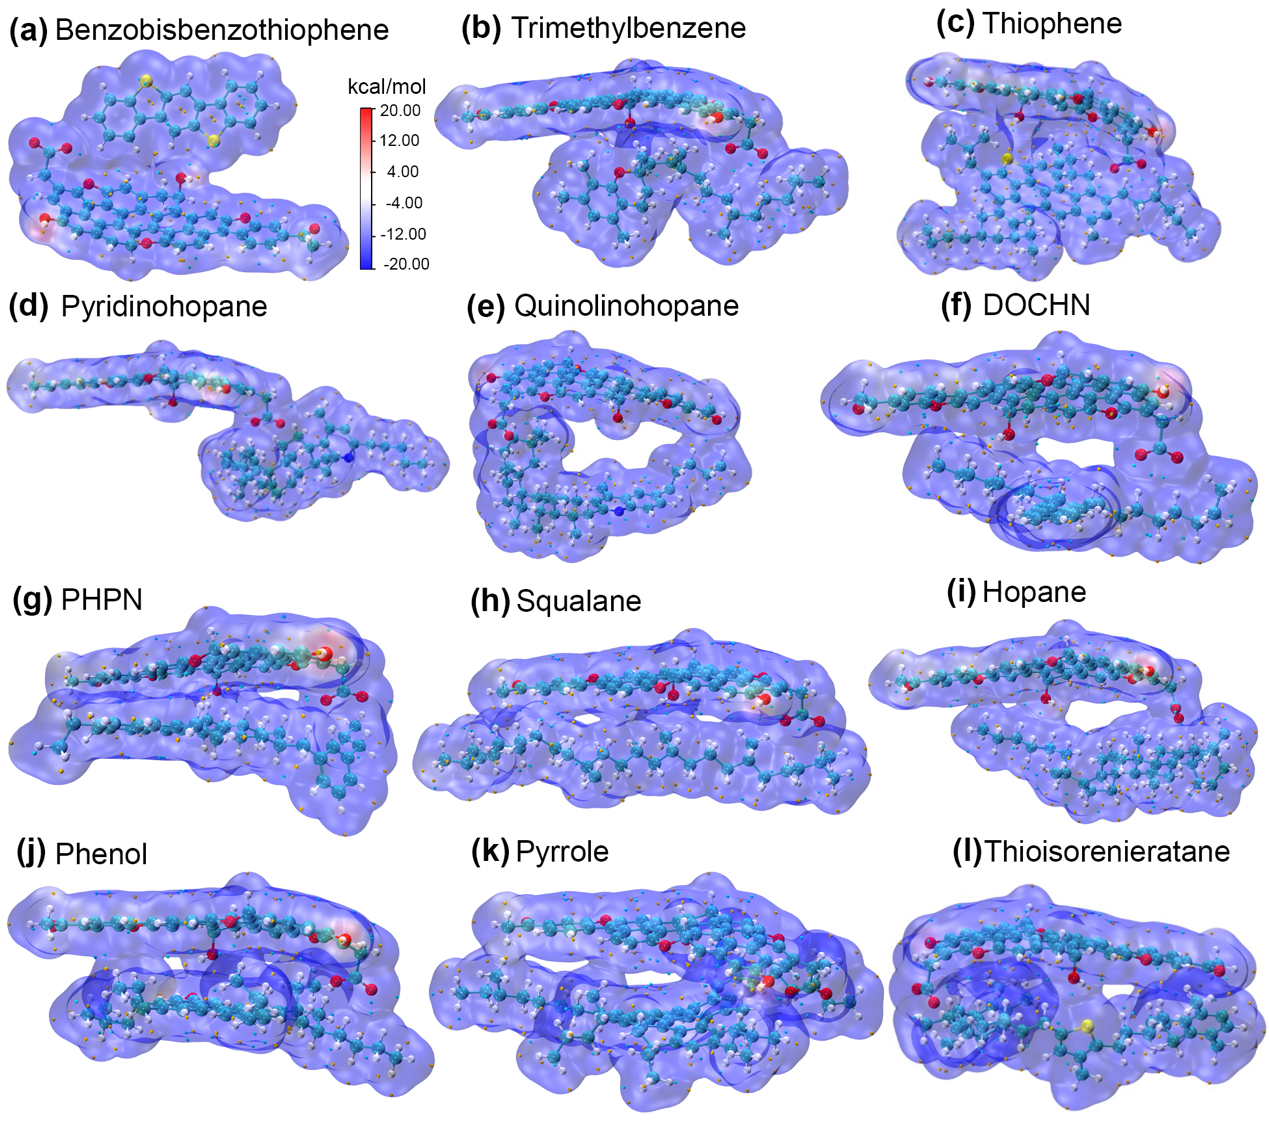
**

**Fig. S6.** Electrostatic potentials (ESP) on the molecular vdW surface of WS-biochar doped asphalt molecules with Resin (a, b, c, d and e), Naphthene Aromatics (f, g), Saturates (h, i), and Asphaltenes (j and k). All the ESP calculations are performed at the level of B3LYP/6-31G (d, p). Yellow and cyan spheres denote the surface local maxima and minima of the ESP values.

**
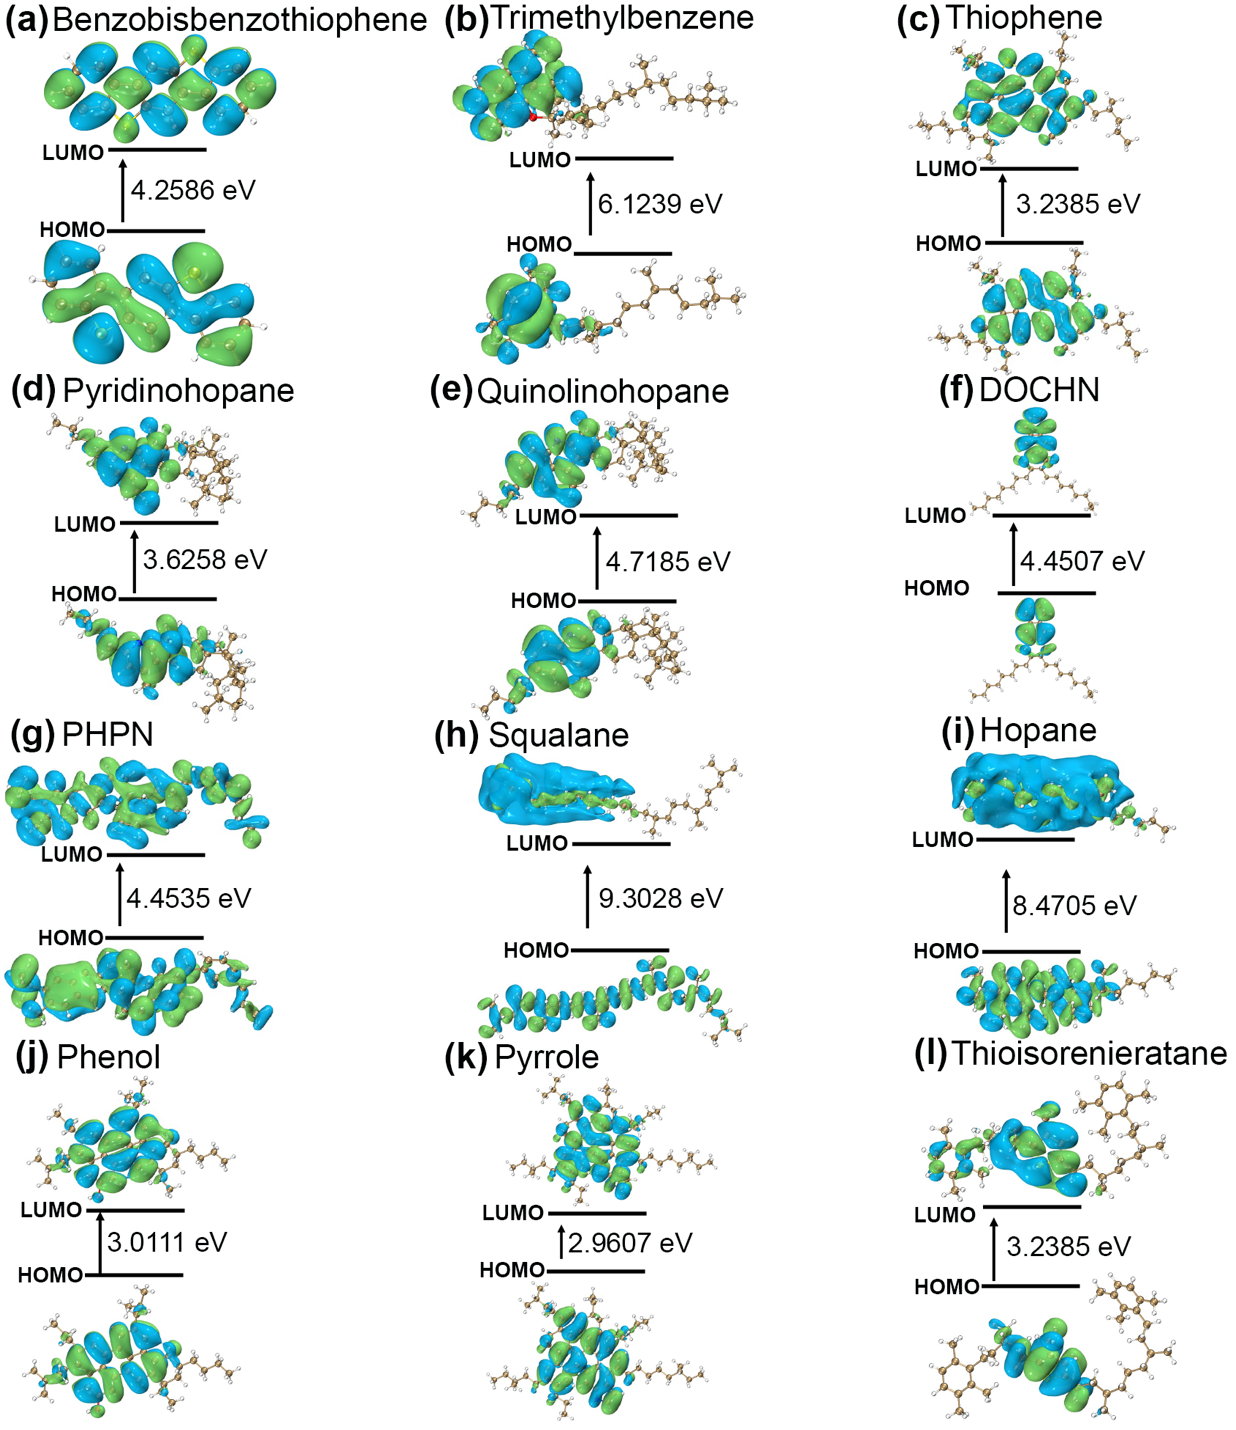
**

**Fig. S7.** Molecular orbital energies and calculated HOMO-LUMO energy gap of twelve asphalt molecules.

**
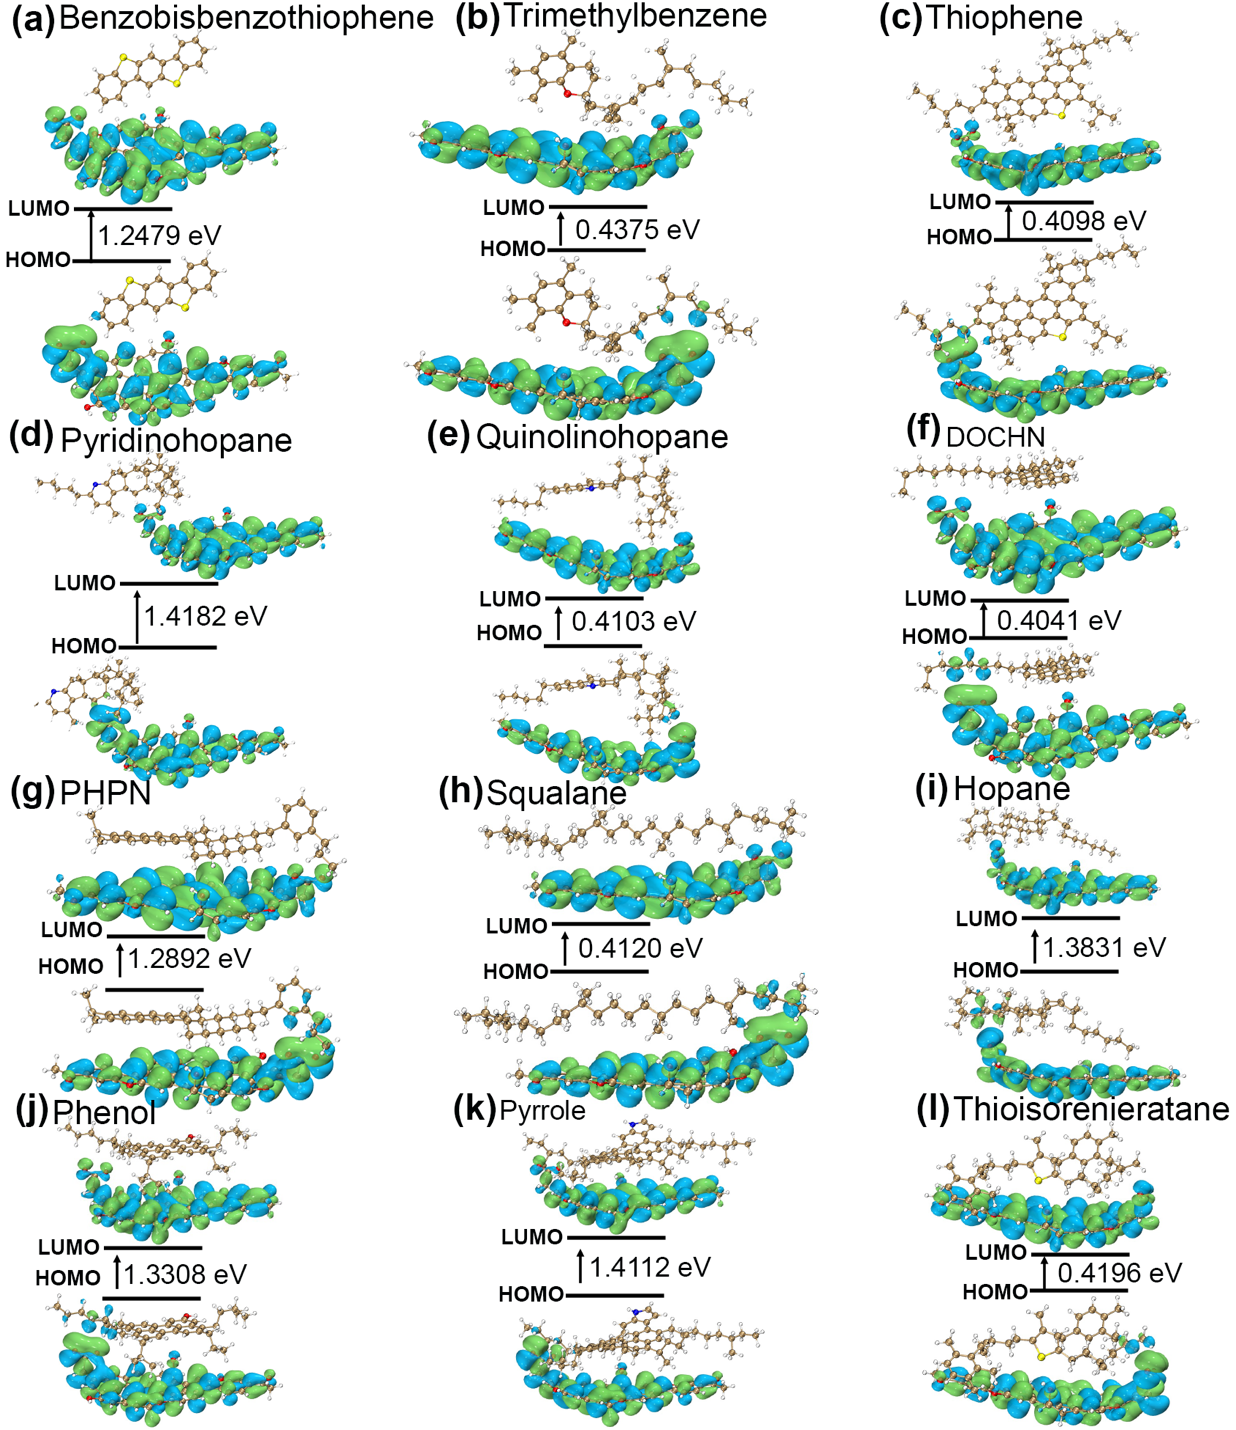
**

**Fig. S8.** Molecular orbital energies and calculated HOMO-LUMO energy gap of WS-biochar doped asphalt systems.

**
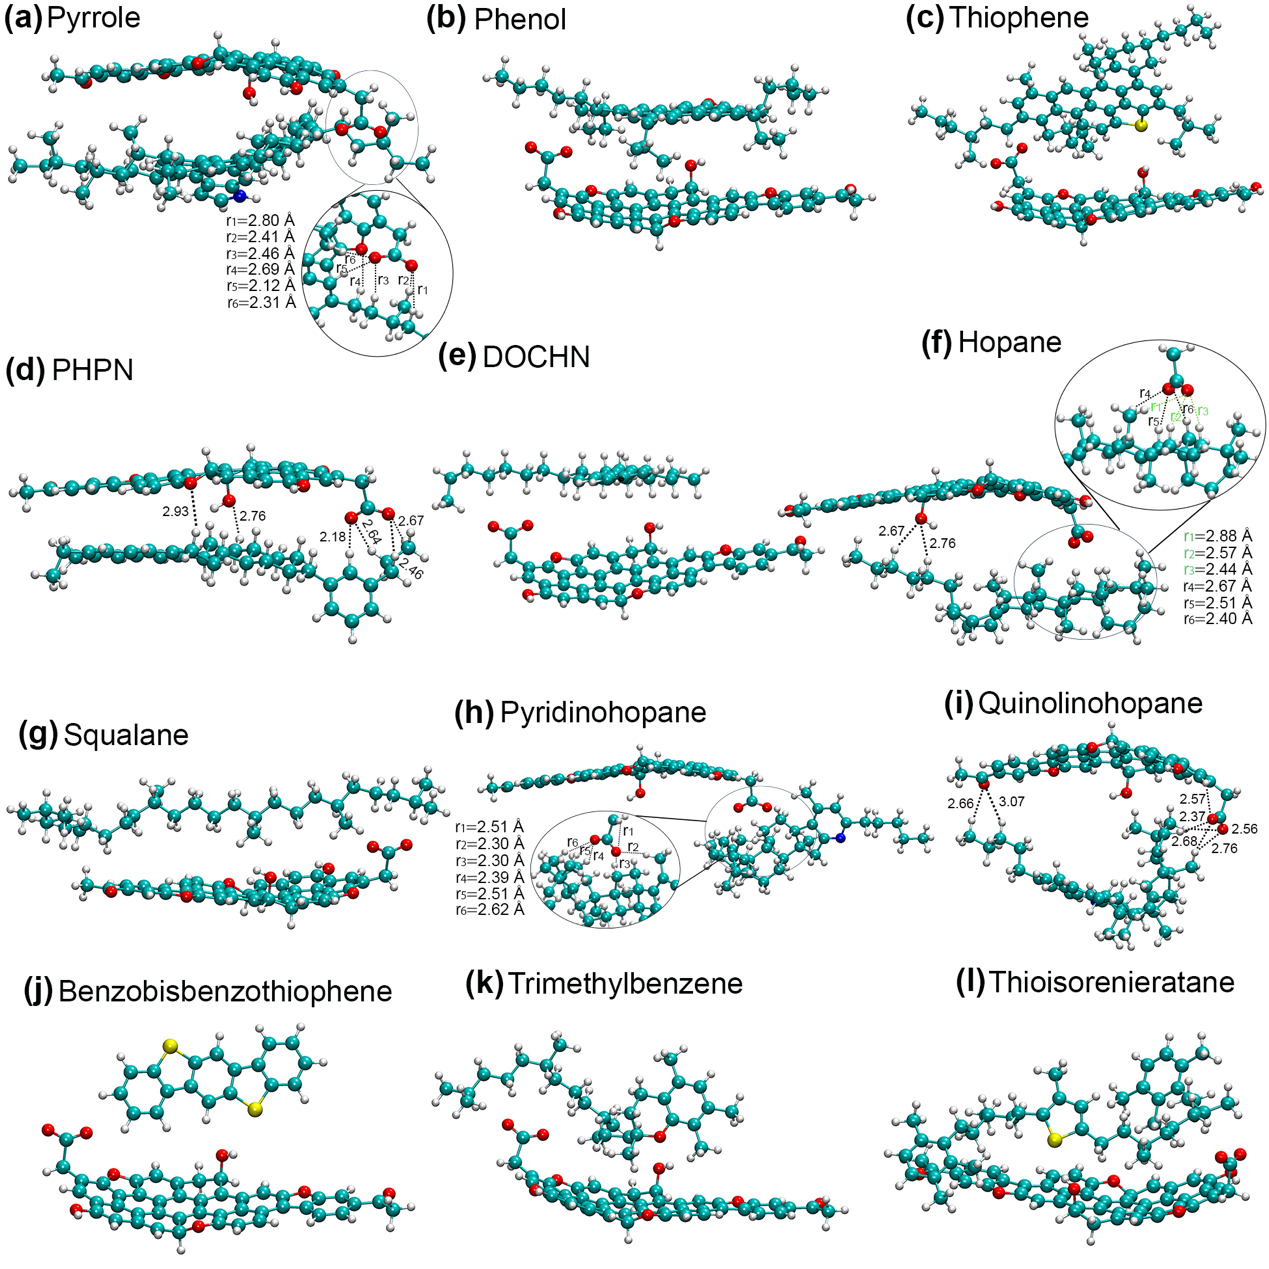
**

**Fig. S9.** Optimized geometries of WS-biochar-doped asphalt systems.

**Table S1.** Physical and chemical properties of biochar sample before grinding. Results obtained from the International Biochar Initiative (IBI) Laboratory Tests for Certification Program, conducted by Control Laboratories, Watsonville, CA 95076, USA ([www.biocharlab.com](http://www.biocharlab.com))

| Properties | Range | Units | Method |
| --- | --- | --- | --- |
| Moisture (time of analysis) | 7.0 | % wet wt. | ASTM D1762-84 (105c) |
| Bulk density | 12.7 | lb/cu ft | - |
| Organic Carbon | 71.3 | % of total dry mass | Dry Combust-ASTM D 4373 |
| H:C | 0.49 | Molar Ratio | H dry combustion/C |
| Total Ash | 17.5 | % of total dry mass | ASTM D-1762-84 |
| Total Nitrogen | 0.81 | % of total dry mass | Dry Combustion |
| pH value | 9.91 | units | 4.11USCC:dil. Rajkovich |
| Electrical Conductivity (EC20 w/w) | 0.543 | dS/m | 4.11USCC:dil. Rajkovich |
| Liming (neut. Value as-CaCO3) | 11.2 | %CaCO3 | AOAC 955.01 |
| Carbonates (as-CaCO3) | 0.2 | %CaCO3 | ASTM D 4373 |
| Surface Area Correlation | 166 | m2/g dry | G |

**Table S2.** The X-ray photoelectron spectroscopy (XPS) analysis on element compositions of the WS-Biochar.

| Name | Peak BE | Height  CPS | FWHM  [eV] | Area (P)  CPS.eV | Atomic conc.  [%] |
| --- | --- | --- | --- | --- | --- |
| C1s | 284.40 | 239779.76 | 3.78 | 1188002.85 | 81.37 |
| O1s | 531.85 | 117037.85 | 4.46 | 549646.93 | 14.98 |
| Si2p | 102.98 | 6747.31 | 3.88 | 28860.51 | 2.02 |
| Na1s | 1071.03 | 8461.97 | 5.51 | 51671.17 | 0.63 |
| Cl2p | 199.26 | 2878.61 | 4.27 | 17340.53 | 0.42 |
| K2s | 377.93 | 6548.28 | 2.55 | 15335.39 | 0.57 |

**Table S3.** The X-ray photoelectron spectroscopy (XPS) analysis on C1s and O1s of the WS-Biochar.

| **Types** | **Functional group** | **Peak Position** | **Percentage** |
| --- | --- | --- | --- |
| C1s | C-C, C=O, or C-H | 284.6 | 41.0 |
| C-O | 286.2 | 14.9 |
| C=O | 287.4 | 13.3 |
| COO | 289.1 | 9.0 |
| Si-C[14,15] | 283.1 | 21.9 |
| O1s | C=O | 531.3 | 63.4 |
| O-H, C-O-C | 533.1 | 36.6 |

**Table S4**. Summary of WS-biochar Model Features.

| **Feature** | **Description** | **Justification / Notes** |
| --- | --- | --- |
| Aromatic domain size | an extended polycyclic structure with ~10 fused rings, decorated with oxygen-containing functional groups on the edges | C:H ratio (0.49 in Table S1), FTIR (Fig. 1), XPS (Fig. 1), and literature[7–9] |
| Functional groups included | -OH, -COO, C=O, -C-O-C | FTIR (Fig. 1), XPS (Fig. 1) |
| Functional groups excluded | N-, S- | Not detected or present in trace amounts (FTIR & XPS in Fig.1) |
| Charge | -1 | The model includes one deprotonated –COO⁻ group based on FTIR/XPS (Fig. 1) characterization |
| Spin | Singlet (closed-shell) | To simplify the molecular model, a closed-shell approximation was used. The exact number and type of free radicals in WS-biochar are difficult to determine experimentally[10–13] |
| Surface heterogeneity | Averaged over possible edge and basal sites | Model represents chemical average, not exhaustive surface coverage |

**Table S5.** The full-width-at-half-maximum (FWHM) values of the X-ray diffraction (XRD) C(002) peak and calculated dislocation densities for all the samples of biochar doped asphalt.

| Samples, % | FWHM (deg, 2*θ*)) | Dislocation density δ (×109, cm-2) |
| --- | --- | --- |
| 0 | 9.4375 | 1337.1128 |
| 2 | 9.4041 | 1327.6652 |
| 4 | 6.4400 | 622.6240 |
| 6 | 6.4857s | 631.4920 |
| 8 | 7.5689 | 860.0420 |
| 10 | 9.1074 | 1245.2110 |

**Table. S6.** Statistical analysis of mechanical properties and coefficient of variation for all the samples of biochar doped asphalt.

| Samples | Adhesion Force (nN) | Young’s Modulus (MPa) | CV of Adhesion Force | CV of Young’s Modulus |
| --- | --- | --- | --- | --- |
| AWS0 | 23.64±2.31 | 564.53±74.33 | 0.083 | 0.112 |
| AWS2 | 27.75±2.01 | 446.59±42.79 | 0.061 | 0.081 |
| AWS4 | 44.71±2.15 | 661.61±45.50 | 0.041 | 0.058 |
| AWS6 | 54.34±2.10 | 516.62±34.00 | 0.033 | 0.056 |
| AWS8 | 38.39±3.25 | 672.79±60.98 | 0.072 | 0.077 |
| AWS10 | 40.03±3.13 | 699.88±43.95 | 0.066 | 0.053 |

**Table. S7.** Statistical analysis of mechanical properties of the microstructures for all the samples of biochar doped asphalt.

| **Samples** | **Adhesion Force (nN)** | | | |
| --- | --- | --- | --- | --- |
| **Crest** | **Valley** | **Surrounding** | **Smooth** |
| AWS0 | 22.21±1.99 | 25.9±3.25 | - | 23.66±2.10 |
| AWS2 | 28.00±2.29 | 27.83±2.25 | - | 27.81±2.10 |
| AWS4 | 41.86±3.06 | 46.12±2.42 | - | 44.57±2.29 |
| AWS6 | 52.07±3.22 | 53.26±2.91 | 54.31±2.74 | 54.34±2.26 |
| AWS8 | 35.21±3.20 | 40.10±3.07 | 38.23±3.04 | 39.10±3.17 |
| AWS10 | 35.46±4.88 | 41.51±8.03 | 39.88±3.11 | 40.15±4.83 |
| **Samples** | **Young’s Modulus (MPa)** | | | |
| **Crest** | **Valley** | **Surrounding** | **Smooth** |
| AWS0 | 573.82±91.63 | 477.06±86.66 | - | 567.22±86.98 |
| AWS2 | 448.02±45.57 | 445.46±49.25 | - | 447.57±46.57 |
| AWS4 | 659.30±67.18 | 635.82±59.02 | - | 660.50±49.20 |
| AWS6 | 519.81±41.98 | 508.65±47.68 | 512.55±35.12 | 516.97±33.47 |
| AWS8 | 678.08±63.47 | 617.78±63.69 | 679.71±63.24 | 648.95±70.90 |
| AWS10 | 715.71±53.40 | 654.69±66.12 | 704.41±45.40 | 681.00±54.46 |

**Table. S8.** Mechanical properties’ coefficient of variation (CV) of the microstructures for all the samples of biochar doped asphalt.

| **Sample** | **CV of Adhesion Force** | | | |
| --- | --- | --- | --- | --- |
| **Crest** | **Valley** | **Surrounding** | **Smooth** |
| 0% | 0.076 | 0.107 | - | 0.075 |
| 2% | 0.069 | 0.069 | - | 0.064 |
| 4% | 0.062 | 0.045 | - | 0.044 |
| 6% | 0.052 | 0.046 | 0.043 | 0.035 |
| 8% | 0.077 | 0.065 | 0.068 | 0.069 |
| 10% | 0.117 | 0.164 | 0.066 | 0.102 |
| **Sample** | **CV of Young’s Modulus** | | | |
| **Crest** | **Valley** | **Surrounding** | **Smooth** |
| 0% | 0.136 | 0.154 | - | 0.130 |
| 2% | 0.086 | 0.094 | - | 0.088 |
| 4% | 0.087 | 0.079 | - | 0.063 |
| 6% | 0.069 | 0.080 | 0.058 | 0.055 |
| 8% | 0.079 | 0.088 | 0.079 | 0.093 |
| 10% | 0.063 | 0.086 | 0.055 | 0.068 |

**Table S9.** HOMO-LUMO energy gaps of twelve asphalt molecules and their corresponding WS-biochar-asphalt complexes calculated by DFT.

| **Four-component** | **Molecules** | **ΔEHOMO-LUMO** (eV) | |
| --- | --- | --- | --- |
| **Free Asphalt** | **Complex** |
| Asphaltenes | Pyrrole | 2.9607 | 1.4112 |
| Phenol | 3.0111 | 1.3308 |
| Thiophene | 3.2385 | 1.4098 |
| Naphthene  Aromatics | PHPN | 4.4535 | 1.2892 |
| DOCHN | 4.4507 | 0.4041 |
| Saturates | Hopane | 8.4705 | 1.3831 |
| Squalane | 9.3028 | 0.4120 |
| Polar Aromatics  (Resin) | Pyridinohopane | 3.6258 | 1.4182 |
| Quinolinohopane | 4.7185 | 0.4103 |
| Benzobisbenzothiopene | 4.2586 | 1.2479 |
| Trimethylbenzene-oxane | 6.1239 | 0.4375 |
| Thioisorenieratane | 5.5653 | 0.4196 |

**Table S10.** Calculated dipole moments of representative asphalt molecules and their corresponding WS-biochar-asphalt complexes obtained from DFT calculations.

| **Four-component** | **Molecules** | **Dipole moment** (Debye) | |
| --- | --- | --- | --- |
| **Free Asphalt** | **Complex** |
| Asphaltenes | Pyrrole | 2.3744 | 18.1715 |
| Phenol | 1.4995 | 16.4793 |
| Thiophene | 1.2299 | 16.2775 |
| Naphthene  Aromatics | PHPN | 0.7210 | 21.9530 |
| DOCHN | 1.2342 | 15.8590 |
| Polar Aromatics  (Resin) | Pyridinohopane | 2.6456 | 9.6475 |
| Quinolinohopane | 2.5964 | 24.6042 |
| Benzobisbenzothiopene | 0.3378 | 16.7517 |
| Trimethylbenzene-oxane | 2.3187 | 30.2682 |
| Thioisorenieratane | 1.1430 | 29.5435 |

REFERENCE

[1] J. Shirokoff, L. Lye, A Review of Asphalt Binders Characterized by X-ray Diffraction, Innovations in Corrosion and Materials Science (Formerly Recent Patents on Corrosion Science) 9 (2019) 28. https://doi.org/10.2174/2352094909666190401205036.

[2] J. Alshammari, J. Alshammari, J.K.C. Lewis, J. Shirokoff, Nanosize Asphaltene in Asphalt Binders Characterized by X-ray Diffraction, Nanoparticle 1 (2019) 1–4.

[3] S. Das Bakshi, D. Sinha, S. Ghosh Chowdhury, Anisotropic broadening of XRD peaks of *α′*-Fe: Williamson-Hall and Warren-Averbach analysis using full width at half maximum (FWHM) and integral breadth (IB), Materials Characterization 142 (2018) 144–153. https://doi.org/10.1016/j.matchar.2018.05.018.

[4] A. Muiruri, M. Maringa, W. du Preez, Evaluation of Dislocation Densities in Various Microstructures of Additively Manufactured Ti6Al4V (Eli) by the Method of X-ray Diffraction, Materials 13 (2020) 5355. https://doi.org/10.3390/ma13235355.

[5] D. Nath, R. Das, Assessing the dislocation density in CdSe nanocrystals from XRD peak profile analysis (XDPPA) assisted by first principles method, Physica E: Low-Dimensional Systems and Nanostructures 144 (2022) 115376. https://doi.org/10.1016/j.physe.2022.115376.

[6] G.K. Williamson, W.H. Hall, X-ray line broadening from filed aluminium and wolfram, Acta Metallurgica 1 (1953) 22–31. https://doi.org/10.1016/0001-6160(53)90006-6.

[7] R. Wood, O. Mašek, V. Erastova, Biochars at the Molecular Level Part 2 – Development of Realistic Molecular Models of Biochars, (2023). https://doi.org/10.2139/ssrn.4606268.

[8] T. Hao, Q. Zhou, J. Jiang, H. Song, Y. Pan, D. Shi, Density functional theory study on the microscopic mechanism of NO2 adsorption and reduction by potassium-doped biochar: the key role of the active sites, Biochar 7 (2025) 67. https://doi.org/10.1007/s42773-025-00449-z.

[9] J. Jiang, Z. Pan, X. Huang, J. Ren, L. Deng, Z. Huang, D. Che, DFT study on adsorption of Pb(Ⅱ) by biochar: focusing on molecular structure and alkali and alkaline earth metals, Separation and Purification Technology 377 (2025) 134474. https://doi.org/10.1016/j.seppur.2025.134474.

[10] Y. Wang, X. Gu, Y. Huang, Z. Ding, Y. Chen, X. Hu, Insight into biomass feedstock on formation of biochar-bound environmentally persistent free radicals under different pyrolysis temperatures, RSC Adv 12 (n.d.) 19318–19326. https://doi.org/10.1039/d2ra03052g.

[11] Biochar-Derived Persistent Free Radicals: A Plethora of Environmental Applications in a Lights and Shadows Scenario[v1] | Preprints.org, (n.d.). https://www.preprints.org/manuscript/202403.0855?utm_source=chatgpt.com (accessed January 2, 2026).

[12] X. Chen, P.J.J. Alvarez, C.A. Masiello, Environmentally Persistent Free Radicals in Biochar: Environmental Context and Future Research Needs, Environ. Sci. Technol. 59 (2025) 11440–11454. https://doi.org/10.1021/acs.est.4c13603.

[13] C. Guo, J. Richmond-Bryant, A Critical Review of Environmentally Persistent Free Radical (EPFR) Solvent Extraction Methodology and Retrieval Efficiency, Chemosphere 284 (2021) 131353. https://doi.org/10.1016/j.chemosphere.2021.131353.

[14] Q. Zhao, Y. Huang, X. Hu, A Si/C nanocomposite anode by ball milling for highly reversible sodium storage, Electrochemistry Communications 70 (2016) 8–12. https://doi.org/10.1016/j.elecom.2016.06.012.

[15] C. Yu, D. Zhang, X. Dong, Q. Lin, Pyrolytic behavior of a zero-valent iron biochar composite and its Cu(II) removal mechanism, RSC Adv. 8 (2018) 34151–34160. https://doi.org/10.1039/C8RA05676E.
