# Supplementary material
Source: Research Square preprint supplement (doi:10.21203/rs.3.rs-9684666/v1)
Supplement: Supplementary file 2 [file b8691ea654e70e7eea80a8bd.docx]

**Supporting Information**

TEXT-II

**Sustainable Utilization of Biomass-Derived Biochar for Asphalt Modification: Multiscale Experimental and Theoretical Insights**

Meili Liua, Shaocheng Shenb, Kun Wangb,c, Fuwu Zhangb, Xianming Shia,*

*a Civil and Architectural Engineering, University of Miami, Coral Gables, Florida 33146, USA*

*b Department of Chemistry, University of Miami, Coral Gables, Florida 33146, USA*

*c Department of Physics, University of Miami, Coral Gables, Florida 33146, USA*

*: Corresponding authors

E-mail address: [xxs784@miami.edu](mailto:xxs784@miami.edu)

**Table SS 1-24**.Local minima and maxima on the Electrostatic potentials (ESP) surface of 12 asphalt molecules and WS-biochar doped Asphalt systems. All the ESP calculations are performed at the level of B3LYP/6-31G (d, p). Yellow and cyan spheres denote the surface local maxima and minima of the ESP values.

**Table of Contents**

[**Table SS 1**. Benzobisbenzothiophene of local minima and maxima on the Electrostatic potentials S4](#_Toc218417757)

[**Table SS 2**. Trimethylbenzene of local minima and maxima on the Electrostatic potentials (ESP) surface S6](#_Toc218417758)

[**Table SS 3**. Thiophene of local minima and maxima on the Electrostatic potentials (ESP) surface S9](#_Toc218417759)

[**Table SS 4**. Pyridinohopane of local minima and maxima on the Electrostatic potentials (ESP) surface S12](#_Toc218417760)

[**Table SS 5**. Quinolinohopane of local minima and maxima on the Electrostatic potentials (ESP) surface S17](#_Toc218417761)

[**Table SS 6**. DOCHN of local minima and maxima on the Electrostatic potentials (ESP) surface S20](#_Toc218417762)

[**Table SS 7**. PHPN of local minima and maxima on the Electrostatic potentials (ESP) surface S23](#_Toc218417763)

[**Table SS 8**. Squalane of local minima and maxima on the Electrostatic potentials (ESP) surface S26](#_Toc218417764)

[**Table SS 9**. Hopane of local minima and maxima on the Electrostatic potentials (ESP) surface S30](#_Toc218417765)

[**Table SS 10**. Phenol of local minima and maxima on the Electrostatic potentials (ESP) surface S33](#_Toc218417766)

[**Table SS 11**. Pyrrole of local minima and maxima on the Electrostatic potentials (ESP) surfaces S37](#_Toc218417767)

[**Table SS 12**. Thioisorenieratane of local minima and maxima on the Electrostatic potentials (ESP) surface S42](#_Toc218417768)

[**Table SS 13**. Benzobisbenzothiophene with WS-biochar of local minima and maxima on the Electrostatic potentials (ESP) surface S46](#_Toc218417769)

[**Table SS 14**. Trimethylbenzene with WS-biochar of local minima and maxima on the Electrostatic potentials (ESP) surface S50](#_Toc218417770)

[**Table SS 15**. Thiophene with WS-biochar of local minima and maxima on the Electrostatic potentials (ESP) surface S55](#_Toc218417771)

[**Table SS 16**. Pyridinohopane with WS-biochar of local minima and maxima on the Electrostatic potentials (ESP) surface S61](#_Toc218417772)

[**Table SS 17**. Quinolinohopane with WS-biochar of local minima and maxima on the Electrostatic potentials (ESP) surface S66](#_Toc218417773)

[**Table SS 18**. DOCHN with WS-biochar of local minima and maxima on the Electrostatic potentials (ESP) surface S71](#_Toc218417774)

[**Table SS 19**. PHPN with WS-biochar of local minima and maxima on the Electrostatic potentials (ESP) surface S76](#_Toc218417775)

[**Table SS 20**. Squalane with WS-biochar of local minima and maxima on the Electrostatic potentials (ESP) surface S80](#_Toc218417776)

[**Table SS 21**. Hopane with WS-biochar of local minima and maxima on the Electrostatic potentials (ESP) surface S86](#_Toc218417777)

[**Table SS 22**. Phenol with WS-biochar of local minima and maxima on the Electrostatic potentials (ESP) surface S92](#_Toc218417778)

[**Table SS 23**. Pyrrole with WS-biochar of local minima and maxima on the Electrostatic potentials (ESP) surface S97](#_Toc218417779)

[**Table SS 24**. Thioisorenieratane with WS-biochar of local minima and maxima on the Electrostatic potentials (ESP) surface S104](#_Toc218417780)

**Table SS 1**. Benzobisbenzothiophene of local minima and maxima on the Electrostatic potentials

REMARK Unit of B-factor field (i.e. ESP) is kcal/mol

REMARK Carbon: Surface maximum Oxygen: surface minimum

HETATM 1 C MOL A 1 -8.044 -0.176 0.017 1.00 15.02 C

HETATM 2 C MOL A 1 -6.312 -3.627 -0.027 1.00 14.62 C

HETATM 3 C MOL A 1 -6.029 2.983 0.024 1.00 15.71 C

HETATM 4 C MOL A 1 -4.360 3.009 0.037 1.00 14.21 C

HETATM 5 C MOL A 1 -4.062 -0.334 -1.740 1.00-11.03 C

HETATM 6 C MOL A 1 -4.044 -0.327 1.744 1.00-11.03 C

HETATM 7 C MOL A 1 -2.134 0.551 1.789 1.00 -4.70 C

HETATM 8 C MOL A 1 -2.149 0.613 -1.792 1.00 -4.70 C

HETATM 9 C MOL A 1 -1.538 -3.535 0.019 1.00 19.83 C

HETATM 10 C MOL A 1 -0.511 3.404 0.016 1.00 15.11 C

HETATM 11 C MOL A 1 -0.002 -0.012 -1.720 1.00 -8.98 C

HETATM 12 C MOL A 1 0.017 0.002 1.721 1.00 -8.98 C

HETATM 13 C MOL A 1 0.492 -3.408 -0.034 1.00 15.10 C

HETATM 14 C MOL A 1 1.556 3.528 0.018 1.00 19.83 C

HETATM 15 C MOL A 1 2.152 -0.561 1.789 1.00 -4.68 C

HETATM 16 C MOL A 1 2.144 -0.565 -1.789 1.00 -4.69 C

HETATM 17 C MOL A 1 4.052 0.308 -1.745 1.00-11.04 C

HETATM 18 C MOL A 1 4.035 0.350 1.744 1.00-11.03 C

HETATM 19 C MOL A 1 4.382 -3.009 -0.033 1.00 14.18 C

HETATM 20 C MOL A 1 6.036 -2.979 0.019 1.00 15.71 C

HETATM 21 C MOL A 1 6.341 3.607 0.029 1.00 14.62 C

HETATM 22 C MOL A 1 8.043 0.166 -0.030 1.00 15.02 C

HETATM 1 O MOL A 1 -4.615 -0.889 -1.892 1.00-12.76 O

HETATM 2 O MOL A 1 -4.619 -0.923 1.900 1.00-12.76 O

HETATM 3 O MOL A 1 -2.385 2.527 -2.199 1.00-14.29 O

HETATM 4 O MOL A 1 -2.364 2.541 2.197 1.00-14.29 O

HETATM 5 O MOL A 1 -0.150 0.872 -1.948 1.00-10.96 O

HETATM 6 O MOL A 1 -0.152 0.863 1.946 1.00-10.96 O

HETATM 7 O MOL A 1 0.159 -0.879 -1.949 1.00-10.95 O

HETATM 8 O MOL A 1 0.152 -0.815 1.937 1.00-10.95 O

HETATM 9 O MOL A 1 2.381 -2.559 -2.193 1.00-14.29 O

HETATM 10 O MOL A 1 2.399 -2.537 2.197 1.00-14.29 O

HETATM 11 O MOL A 1 4.590 0.937 -1.899 1.00-12.76 O

HETATM 12 O MOL A 1 4.608 0.943 1.904 1.00-12.76 O

END

**Table SS 2**. Trimethylbenzene of local minima and maxima on the Electrostatic potentials (ESP) surface.

REMARK Unit of B-factor field (i.e. ESP) is kcal/mol

REMARK Carbon: Surface maximum Oxygen: surface minimum

HETATM 1 C MOL A 1 -12.402 -1.490 1.426 1.00 6.47 C

HETATM 2 C MOL A 1 -11.501 1.965 -0.471 1.00 6.08 C

HETATM 3 C MOL A 1 -11.191 -1.602 -2.441 1.00 6.45 C

HETATM 4 C MOL A 1 -10.853 -0.988 3.161 1.00 6.59 C

HETATM 5 C MOL A 1 -9.753 2.524 1.435 1.00 6.32 C

HETATM 6 C MOL A 1 -9.139 2.411 -1.202 1.00 4.93 C

HETATM 7 C MOL A 1 -9.004 -1.245 -2.984 1.00 5.62 C

HETATM 8 C MOL A 1 -8.903 -2.978 0.465 1.00 5.10 C

HETATM 9 C MOL A 1 -7.159 1.918 2.166 1.00 4.52 C

HETATM 10 C MOL A 1 -7.036 -0.295 2.511 1.00 7.10 C

HETATM 11 C MOL A 1 -6.619 -2.033 0.982 1.00 6.02 C

HETATM 12 C MOL A 1 -6.438 2.980 -1.671 1.00 5.03 C

HETATM 13 C MOL A 1 -5.903 -0.853 -2.730 1.00 6.20 C

HETATM 14 C MOL A 1 -5.889 2.553 3.123 1.00 6.61 C

HETATM 15 C MOL A 1 -4.833 -1.301 -2.144 1.00 5.95 C

HETATM 16 C MOL A 1 -4.769 -1.006 1.987 1.00 5.62 C

HETATM 17 C MOL A 1 -4.373 4.155 -0.318 1.00 6.30 C

HETATM 18 C MOL A 1 -4.002 2.650 -2.273 1.00 5.33 C

HETATM 19 C MOL A 1 -2.729 -2.069 -2.749 1.00 5.63 C

HETATM 20 C MOL A 1 -2.390 -1.701 1.091 1.00 7.41 C

HETATM 21 C MOL A 1 -2.135 -2.407 0.621 1.00 7.51 C

HETATM 22 C MOL A 1 -2.084 2.014 2.045 1.00 7.59 C

HETATM 23 C MOL A 1 -1.662 1.896 -3.189 1.00 5.27 C

HETATM 24 C MOL A 1 -1.330 2.108 0.814 1.00 7.01 C

HETATM 25 C MOL A 1 -0.322 -2.110 -4.220 1.00 5.97 C

HETATM 26 C MOL A 1 0.368 1.832 -3.666 1.00 5.60 C

HETATM 27 C MOL A 1 0.463 -3.698 -2.157 1.00 6.12 C

HETATM 28 C MOL A 1 0.601 -0.218 2.354 1.00 9.76 C

HETATM 29 C MOL A 1 0.846 1.061 0.378 1.00 7.46 C

HETATM 30 C MOL A 1 1.201 -1.227 3.478 1.00 11.02 C

HETATM 31 C MOL A 1 1.201 1.315 1.116 1.00 9.55 C

HETATM 32 C MOL A 1 1.493 -3.859 2.711 1.00 11.40 C

HETATM 33 C MOL A 1 1.970 3.365 1.021 1.00 8.72 C

HETATM 34 C MOL A 1 2.628 -3.532 -1.501 1.00 5.87 C

HETATM 35 C MOL A 1 2.868 -1.398 -2.699 1.00 2.22 C

HETATM 36 C MOL A 1 3.651 2.045 3.905 1.00 9.52 C

HETATM 37 C MOL A 1 3.655 -4.863 -0.246 1.00 7.13 C

HETATM 38 C MOL A 1 4.360 3.135 3.729 1.00 8.82 C

HETATM 39 C MOL A 1 4.891 -1.486 4.156 1.00 6.91 C

HETATM 40 C MOL A 1 5.208 -3.547 3.453 1.00 6.80 C

HETATM 41 C MOL A 1 5.456 5.426 0.475 1.00 7.87 C

HETATM 42 C MOL A 1 6.004 -3.485 -1.448 1.00 -0.11 C

HETATM 43 C MOL A 1 6.919 4.584 -0.713 1.00 6.96 C

HETATM 44 C MOL A 1 7.286 -0.830 -3.669 1.00 5.34 C

HETATM 45 C MOL A 1 7.511 0.505 -4.066 1.00 6.41 C

HETATM 46 C MOL A 1 8.397 3.841 -1.910 1.00 6.90 C

HETATM 47 C MOL A 1 9.274 -1.633 -0.567 1.00 4.28 C

HETATM 48 C MOL A 1 9.965 0.190 -1.215 1.00 5.85 C

HETATM 1 O MOL A 1 -12.752 -0.207 -0.824 1.00 -2.38 O

HETATM 2 O MOL A 1 -11.763 0.651 1.215 1.00 -2.03 O

HETATM 3 O MOL A 1 -11.159 0.825 1.795 1.00 -1.96 O

HETATM 4 O MOL A 1 -10.851 0.545 -2.040 1.00 -2.11 O

HETATM 5 O MOL A 1 -10.003 0.667 -2.151 1.00 -1.98 O

HETATM 6 O MOL A 1 -9.909 1.777 -0.078 1.00 2.42 O

HETATM 7 O MOL A 1 -9.626 1.058 3.236 1.00 -1.87 O

HETATM 8 O MOL A 1 -6.671 3.062 0.471 1.00 -2.04 O

HETATM 9 O MOL A 1 -6.531 -2.065 -1.140 1.00 -0.67 O

HETATM 10 O MOL A 1 -6.035 3.358 0.943 1.00 -2.04 O

HETATM 11 O MOL A 1 -5.016 2.806 -1.123 1.00 2.41 O

HETATM 12 O MOL A 1 -4.238 3.914 2.035 1.00 -2.00 O

HETATM 13 O MOL A 1 -3.765 0.469 -2.830 1.00 -1.74 O

HETATM 14 O MOL A 1 -3.148 0.311 1.694 1.00 0.87 O

HETATM 15 O MOL A 1 -2.569 -0.056 -3.534 1.00 -1.91 O

HETATM 16 O MOL A 1 -1.964 -0.190 -3.710 1.00 -1.94 O

HETATM 17 O MOL A 1 -1.932 0.343 1.552 1.00 0.76 O

HETATM 18 O MOL A 1 -1.356 -3.220 -1.362 1.00 -0.07 O

HETATM 19 O MOL A 1 -0.638 1.701 -1.596 1.00 1.72 O

HETATM 20 O MOL A 1 -0.248 -2.190 2.047 1.00 2.82 O

HETATM 21 O MOL A 1 2.263 0.812 -2.874 1.00 -4.34 O

HETATM 22 O MOL A 1 3.241 -1.161 4.356 1.00 2.69 O

HETATM 23 O MOL A 1 4.566 -2.120 -1.243 1.00-17.40 O

HETATM 24 O MOL A 1 4.737 1.616 -1.608 1.00-20.64 O

HETATM 25 O MOL A 1 6.194 -2.574 1.019 1.00-25.87 O

HETATM 26 O MOL A 1 7.087 1.301 1.293 1.00-21.37 O

HETATM 27 O MOL A 1 9.466 1.812 -2.872 1.00 -1.66 O

END

**Table SS 3**. Thiophene of local minima and maxima on the Electrostatic potentials (ESP) surface.

REMARK Unit of B-factor field (i.e. ESP) is kcal/mol

REMARK Carbon: Surface maximum Oxygen: surface minimum

HETATM 1 C MOL A 1 -12.402 -1.490 1.426 1.00 6.47 C

HETATM 2 C MOL A 1 -11.501 1.965 -0.471 1.00 6.08 C

HETATM 3 C MOL A 1 -11.191 -1.602 -2.441 1.00 6.45 C

HETATM 4 C MOL A 1 -10.853 -0.988 3.161 1.00 6.59 C

HETATM 5 C MOL A 1 -9.753 2.524 1.435 1.00 6.32 C

HETATM 6 C MOL A 1 -9.139 2.411 -1.202 1.00 4.93 C

HETATM 7 C MOL A 1 -9.004 -1.245 -2.984 1.00 5.62 C

HETATM 8 C MOL A 1 -8.903 -2.978 0.465 1.00 5.10 C

HETATM 9 C MOL A 1 -7.159 1.918 2.166 1.00 4.52 C

HETATM 10 C MOL A 1 -7.036 -0.295 2.511 1.00 7.10 C

HETATM 11 C MOL A 1 -6.619 -2.033 0.982 1.00 6.02 C

HETATM 12 C MOL A 1 -6.438 2.980 -1.671 1.00 5.03 C

HETATM 13 C MOL A 1 -5.903 -0.853 -2.730 1.00 6.20 C

HETATM 14 C MOL A 1 -5.889 2.553 3.123 1.00 6.61 C

HETATM 15 C MOL A 1 -4.833 -1.301 -2.144 1.00 5.95 C

HETATM 16 C MOL A 1 -4.769 -1.006 1.987 1.00 5.62 C

HETATM 17 C MOL A 1 -4.373 4.155 -0.318 1.00 6.30 C

HETATM 18 C MOL A 1 -4.002 2.650 -2.273 1.00 5.33 C

HETATM 19 C MOL A 1 -2.729 -2.069 -2.749 1.00 5.63 C

HETATM 20 C MOL A 1 -2.390 -1.701 1.091 1.00 7.41 C

HETATM 21 C MOL A 1 -2.135 -2.407 0.621 1.00 7.51 C

HETATM 22 C MOL A 1 -2.084 2.014 2.045 1.00 7.59 C

HETATM 23 C MOL A 1 -1.662 1.896 -3.189 1.00 5.27 C

HETATM 24 C MOL A 1 -1.330 2.108 0.814 1.00 7.01 C

HETATM 25 C MOL A 1 -0.322 -2.110 -4.220 1.00 5.97 C

HETATM 26 C MOL A 1 0.368 1.832 -3.666 1.00 5.60 C

HETATM 27 C MOL A 1 0.463 -3.698 -2.157 1.00 6.12 C

HETATM 28 C MOL A 1 0.601 -0.218 2.354 1.00 9.76 C

HETATM 29 C MOL A 1 0.846 1.061 0.378 1.00 7.46 C

HETATM 30 C MOL A 1 1.201 -1.227 3.478 1.00 11.02 C

HETATM 31 C MOL A 1 1.201 1.315 1.116 1.00 9.55 C

HETATM 32 C MOL A 1 1.493 -3.859 2.711 1.00 11.40 C

HETATM 33 C MOL A 1 1.970 3.365 1.021 1.00 8.72 C

HETATM 34 C MOL A 1 2.628 -3.532 -1.501 1.00 5.87 C

HETATM 35 C MOL A 1 2.868 -1.398 -2.699 1.00 2.22 C

HETATM 36 C MOL A 1 3.651 2.045 3.905 1.00 9.52 C

HETATM 37 C MOL A 1 3.655 -4.863 -0.246 1.00 7.13 C

HETATM 38 C MOL A 1 4.360 3.135 3.729 1.00 8.82 C

HETATM 39 C MOL A 1 4.891 -1.486 4.156 1.00 6.91 C

HETATM 40 C MOL A 1 5.208 -3.547 3.453 1.00 6.80 C

HETATM 41 C MOL A 1 5.456 5.426 0.475 1.00 7.87 C

HETATM 42 C MOL A 1 6.004 -3.485 -1.448 1.00 -0.11 C

HETATM 43 C MOL A 1 6.919 4.584 -0.713 1.00 6.96 C

HETATM 44 C MOL A 1 7.286 -0.830 -3.669 1.00 5.34 C

HETATM 45 C MOL A 1 7.511 0.505 -4.066 1.00 6.41 C

HETATM 46 C MOL A 1 8.397 3.841 -1.910 1.00 6.90 C

HETATM 47 C MOL A 1 9.274 -1.633 -0.567 1.00 4.28 C

HETATM 48 C MOL A 1 9.965 0.190 -1.215 1.00 5.85 C

HETATM 1 O MOL A 1 -12.752 -0.207 -0.824 1.00 -2.38 O

HETATM 2 O MOL A 1 -11.763 0.651 1.215 1.00 -2.03 O

HETATM 3 O MOL A 1 -11.159 0.825 1.795 1.00 -1.96 O

HETATM 4 O MOL A 1 -10.851 0.545 -2.040 1.00 -2.11 O

HETATM 5 O MOL A 1 -10.003 0.667 -2.151 1.00 -1.98 O

HETATM 6 O MOL A 1 -9.909 1.777 -0.078 1.00 2.42 O

HETATM 7 O MOL A 1 -9.626 1.058 3.236 1.00 -1.87 O

HETATM 8 O MOL A 1 -6.671 3.062 0.471 1.00 -2.04 O

HETATM 9 O MOL A 1 -6.531 -2.065 -1.140 1.00 -0.67 O

HETATM 10 O MOL A 1 -6.035 3.358 0.943 1.00 -2.04 O

HETATM 11 O MOL A 1 -5.016 2.806 -1.123 1.00 2.41 O

HETATM 12 O MOL A 1 -4.238 3.914 2.035 1.00 -2.00 O

HETATM 13 O MOL A 1 -3.765 0.469 -2.830 1.00 -1.74 O

HETATM 14 O MOL A 1 -3.148 0.311 1.694 1.00 0.87 O

HETATM 15 O MOL A 1 -2.569 -0.056 -3.534 1.00 -1.91 O

HETATM 16 O MOL A 1 -1.964 -0.190 -3.710 1.00 -1.94 O

HETATM 17 O MOL A 1 -1.932 0.343 1.552 1.00 0.76 O

HETATM 18 O MOL A 1 -1.356 -3.220 -1.362 1.00 -0.07 O

HETATM 19 O MOL A 1 -0.638 1.701 -1.596 1.00 1.72 O

HETATM 20 O MOL A 1 -0.248 -2.190 2.047 1.00 2.82 O

HETATM 21 O MOL A 1 2.263 0.812 -2.874 1.00 -4.34 O

HETATM 22 O MOL A 1 3.241 -1.161 4.356 1.00 2.69 O

HETATM 23 O MOL A 1 4.566 -2.120 -1.243 1.00-17.40 O

HETATM 24 O MOL A 1 4.737 1.616 -1.608 1.00-20.64 O

HETATM 25 O MOL A 1 6.194 -2.574 1.019 1.00-25.87 O

HETATM 26 O MOL A 1 7.087 1.301 1.293 1.00-21.37 O

HETATM 27 O MOL A 1 9.466 1.812 -2.872 1.00 -1.66 O

END

**Table SS 4**. Pyridinohopane of local minima and maxima on the Electrostatic potentials (ESP) surface.

REMARK Unit of B-factor field (i.e. ESP) is eV

REMARK Carbon: Surface maximum Oxygen: surface minimum

HETATM 1 C MOL A 1 -18.297 -3.900 0.958 1.00 -0.58 C

HETATM 2 C MOL A 1 -16.866 -0.404 0.791 1.00 -0.33 C

HETATM 3 C MOL A 1 -15.612 -2.553 3.247 1.00 -0.35 C

HETATM 4 C MOL A 1 -15.434 -0.568 2.375 1.00 -0.27 C

HETATM 5 C MOL A 1 -13.034 -0.565 -1.330 1.00 -1.55 C

HETATM 6 C MOL A 1 -12.496 -4.378 -2.547 1.00 -0.96 C

HETATM 7 C MOL A 1 -12.024 1.376 2.494 1.00 -0.31 C

HETATM 8 C MOL A 1 -11.804 -2.709 1.149 1.00 -1.57 C

HETATM 9 C MOL A 1 -11.282 -0.565 -2.199 1.00 -1.26 C

HETATM 10 C MOL A 1 -10.044 -2.695 0.224 1.00 -1.27 C

HETATM 11 C MOL A 1 -9.637 3.557 3.645 1.00 -0.62 C

HETATM 12 C MOL A 1 -9.396 0.777 -1.973 1.00 -1.61 C

HETATM 13 C MOL A 1 -8.860 2.761 -0.426 1.00 -1.65 C

HETATM 14 C MOL A 1 -8.028 -1.359 0.341 1.00 -1.58 C

HETATM 15 C MOL A 1 -7.759 -2.721 -3.670 1.00 -0.73 C

HETATM 16 C MOL A 1 -7.536 0.387 1.706 1.00 -1.80 C

HETATM 17 C MOL A 1 -7.191 1.986 -2.072 1.00 -1.58 C

HETATM 18 C MOL A 1 -6.547 5.890 -0.401 1.00 -0.93 C

HETATM 19 C MOL A 1 -6.464 -2.777 -0.325 1.00 -0.06 C

HETATM 20 C MOL A 1 -5.661 1.590 1.690 1.00 -1.80 C

HETATM 21 C MOL A 1 -5.090 0.006 -5.690 1.00 -0.90 C

HETATM 22 C MOL A 1 -4.897 3.007 -2.265 1.00 -1.61 C

HETATM 23 C MOL A 1 -4.886 6.251 3.539 1.00 -0.74 C

HETATM 24 C MOL A 1 -4.611 2.372 1.853 1.00 -1.85 C

HETATM 25 C MOL A 1 -4.022 0.863 0.277 1.00 -1.94 C

HETATM 26 C MOL A 1 -2.984 -2.404 -4.797 1.00 -1.08 C

HETATM 27 C MOL A 1 -2.815 2.293 -3.494 1.00 -1.80 C

HETATM 28 C MOL A 1 -2.570 4.112 -1.970 1.00 -1.70 C

HETATM 29 C MOL A 1 -2.225 0.264 -0.718 1.00 -2.24 C

HETATM 30 C MOL A 1 -2.139 1.737 0.515 1.00 -2.12 C

HETATM 31 C MOL A 1 -1.773 3.182 2.056 1.00 -2.04 C

HETATM 32 C MOL A 1 -1.328 -1.475 -4.724 1.00 -0.99 C

HETATM 33 C MOL A 1 -1.204 -2.375 2.631 1.00 -2.00 C

HETATM 34 C MOL A 1 -0.769 0.705 -0.519 1.00 -2.38 C

HETATM 35 C MOL A 1 -0.669 3.004 -3.250 1.00 -1.68 C

HETATM 36 C MOL A 1 -0.510 7.139 4.046 1.00 0.92 C

HETATM 37 C MOL A 1 -0.118 -3.582 -0.560 1.00 -2.09 C

HETATM 38 C MOL A 1 0.073 0.657 4.711 1.00 -1.98 C

HETATM 39 C MOL A 1 0.604 -5.009 2.543 1.00 -1.90 C

HETATM 40 C MOL A 1 1.469 -3.185 5.789 1.00 -1.70 C

HETATM 41 C MOL A 1 1.639 -6.264 0.404 1.00 -1.76 C

HETATM 42 C MOL A 1 2.169 -6.150 3.878 1.00 -1.60 C

HETATM 43 C MOL A 1 2.263 0.575 7.011 1.00 -1.66 C

HETATM 44 C MOL A 1 2.198 2.206 5.073 1.00 -1.97 C

HETATM 45 C MOL A 1 2.954 5.461 1.014 1.00 -1.56 C

HETATM 46 C MOL A 1 3.149 2.938 -3.400 1.00 -1.81 C

HETATM 47 C MOL A 1 3.300 -2.777 6.739 1.00 -1.68 C

HETATM 48 C MOL A 1 3.392 -7.457 1.433 1.00 -1.52 C

HETATM 49 C MOL A 1 3.464 -5.164 -3.018 1.00 -1.64 C

HETATM 50 C MOL A 1 4.074 -6.847 -2.079 1.00 -1.54 C

HETATM 51 C MOL A 1 5.005 -4.304 5.460 1.00 -1.60 C

HETATM 52 C MOL A 1 5.460 1.030 4.135 1.00 -2.24 C

HETATM 53 C MOL A 1 5.742 -0.172 6.018 1.00 -1.75 C

HETATM 54 C MOL A 1 5.898 -4.016 4.880 1.00 -1.65 C

HETATM 55 C MOL A 1 6.667 1.298 -4.252 1.00 -1.67 C

HETATM 56 C MOL A 1 6.788 -6.342 2.307 1.00 -1.58 C

HETATM 57 C MOL A 1 6.803 -2.933 -3.951 1.00 -1.62 C

HETATM 58 C MOL A 1 6.849 -6.685 0.463 1.00 -1.52 C

HETATM 59 C MOL A 1 6.822 -6.088 -2.193 1.00 -1.56 C

HETATM 60 C MOL A 1 8.199 4.191 -2.705 1.00 -1.50 C

HETATM 61 C MOL A 1 8.761 -3.585 2.848 1.00 -1.65 C

HETATM 62 C MOL A 1 9.032 -2.212 2.726 1.00 -1.70 C

HETATM 63 C MOL A 1 9.193 -5.220 -1.732 1.00 -1.50 C

HETATM 64 C MOL A 1 10.122 -2.232 -3.220 1.00 -1.78 C

HETATM 65 C MOL A 1 10.315 3.994 -2.306 1.00 -1.26 C

HETATM 66 C MOL A 1 10.620 -3.904 0.167 1.00 -1.60 C

HETATM 67 C MOL A 1 12.307 4.081 -1.470 1.00 -1.22 C

HETATM 68 C MOL A 1 12.846 1.363 -4.098 1.00 -1.32 C

HETATM 69 C MOL A 1 14.726 2.690 1.505 1.00 -1.13 C

HETATM 70 C MOL A 1 14.796 3.944 -2.231 1.00 -1.07 C

HETATM 71 C MOL A 1 15.916 -1.008 0.094 1.00 -1.13 C

HETATM 72 C MOL A 1 16.039 0.510 -3.453 1.00 -1.04 C

HETATM 73 C MOL A 1 17.041 4.215 -0.944 1.00 -0.86 C

HETATM 74 C MOL A 1 18.137 1.516 1.583 1.00 -0.83 C

HETATM 75 C MOL A 1 18.222 0.706 -2.148 1.00 -0.84 C

HETATM 1 O MOL A 1 -15.947 -5.412 -1.599 1.00 -2.66 O

HETATM 2 O MOL A 1 -13.649 -1.200 -1.867 1.00 -1.63 O

HETATM 3 O MOL A 1 -13.386 0.070 -0.825 1.00 -1.64 O

HETATM 4 O MOL A 1 -12.239 -3.582 0.893 1.00 -1.65 O

HETATM 5 O MOL A 1 -11.994 -2.312 1.853 1.00 -1.66 O

HETATM 6 O MOL A 1 -10.271 -3.582 -2.704 1.00 -2.08 O

HETATM 7 O MOL A 1 -9.580 3.086 0.039 1.00 -1.76 O

HETATM 8 O MOL A 1 -9.222 2.051 -1.266 1.00 -1.73 O

HETATM 9 O MOL A 1 -8.849 0.423 -2.941 1.00 -1.77 O

HETATM 10 O MOL A 1 -7.976 0.516 2.457 1.00 -1.90 O

HETATM 11 O MOL A 1 -6.591 1.578 -3.064 1.00 -1.77 O

HETATM 12 O MOL A 1 -6.309 0.591 1.504 1.00 -1.89 O

HETATM 13 O MOL A 1 -5.882 3.007 -2.196 1.00 -1.68 O

HETATM 14 O MOL A 1 -5.767 2.925 3.242 1.00 -2.44 O

HETATM 15 O MOL A 1 -3.624 2.530 -3.365 1.00 -1.84 O

HETATM 16 O MOL A 1 -3.537 3.097 2.761 1.00 -2.21 O

HETATM 17 O MOL A 1 -3.452 -2.386 -1.274 1.00 -3.10 O

HETATM 18 O MOL A 1 -2.272 3.245 -3.204 1.00 -1.86 O

HETATM 19 O MOL A 1 -2.224 1.774 -4.290 1.00 -1.91 O

HETATM 20 O MOL A 1 -1.934 6.673 0.469 1.00 -1.91 O

HETATM 21 O MOL A 1 -1.509 -0.724 -1.316 1.00 -2.50 O

HETATM 22 O MOL A 1 -1.533 3.561 2.855 1.00 -2.20 O

HETATM 23 O MOL A 1 -1.182 -0.597 -1.306 1.00 -2.50 O

HETATM 24 O MOL A 1 0.236 -3.069 3.489 1.00 -2.25 O

HETATM 25 O MOL A 1 0.905 -0.422 5.600 1.00 -2.17 O

HETATM 26 O MOL A 1 1.160 5.166 -1.517 1.00 -2.18 O

HETATM 27 O MOL A 1 1.320 -0.085 -1.113 1.00 -4.48 O

HETATM 28 O MOL A 1 1.470 1.010 4.966 1.00 -2.17 O

HETATM 29 O MOL A 1 1.644 4.920 2.868 1.00 -2.60 O

HETATM 30 O MOL A 1 1.903 -5.291 1.822 1.00 -2.05 O

HETATM 31 O MOL A 1 2.660 -4.727 5.677 1.00 -1.94 O

HETATM 32 O MOL A 1 4.538 -5.407 3.779 1.00 -2.01 O

HETATM 33 O MOL A 1 4.787 1.737 -1.943 1.00 -3.16 O

HETATM 34 O MOL A 1 4.956 -7.639 -0.244 1.00 -1.84 O

HETATM 35 O MOL A 1 5.053 -6.420 2.134 1.00 -1.89 O

HETATM 36 O MOL A 1 5.018 -2.153 5.145 1.00 -2.13 O

HETATM 37 O MOL A 1 5.425 1.020 1.494 1.00 -4.37 O

HETATM 38 O MOL A 1 5.839 -6.759 -1.276 1.00 -1.84 O

HETATM 39 O MOL A 1 7.310 -4.542 3.475 1.00 -1.91 O

HETATM 40 O MOL A 1 7.420 -4.556 -3.034 1.00 -1.97 O

HETATM 41 O MOL A 1 7.666 -5.250 -1.431 1.00 -1.78 O

HETATM 42 O MOL A 1 8.693 -4.029 0.869 1.00 -1.95 O

HETATM 43 O MOL A 1 9.643 0.126 -2.714 1.00 -2.49 O

HETATM 44 O MOL A 1 11.960 -1.111 0.714 1.00 -3.42 O

HETATM 45 O MOL A 1 16.171 2.958 0.979 1.00 -1.25 O

HETATM 46 O MOL A 1 17.066 -0.089 -0.045 1.00 -1.25 O

HETATM 47 O MOL A 1 18.563 2.478 -0.625 1.00 -1.18 O

END

**Table SS 5**. Quinolinohopane of local minima and maxima on the Electrostatic potentials (ESP) surface.

REMARK Unit of B-factor field (i.e. ESP) is kcal/mol

REMARK Carbon: Surface maximum Oxygen: surface minimum

HETATM 1 C MOL A 1 -13.837 0.662 0.218 1.00 6.64 C

HETATM 2 C MOL A 1 -12.088 4.273 -0.256 1.00 6.59 C

HETATM 3 C MOL A 1 -11.622 2.245 3.218 1.00 6.87 C

HETATM 4 C MOL A 1 -10.748 1.056 -2.256 1.00 5.94 C

HETATM 5 C MOL A 1 -10.246 -0.975 1.014 1.00 6.89 C

HETATM 6 C MOL A 1 -9.689 4.425 -0.494 1.00 5.85 C

HETATM 7 C MOL A 1 -9.446 -1.387 0.153 1.00 7.55 C

HETATM 8 C MOL A 1 -8.882 2.265 2.949 1.00 6.73 C

HETATM 9 C MOL A 1 -8.697 1.055 -2.408 1.00 5.33 C

HETATM 10 C MOL A 1 -8.529 -1.167 -2.330 1.00 9.87 C

HETATM 11 C MOL A 1 -6.986 0.762 2.847 1.00 8.91 C

HETATM 12 C MOL A 1 -6.391 3.278 0.607 1.00 4.98 C

HETATM 13 C MOL A 1 -5.780 -2.396 -3.949 1.00 3.90 C

HETATM 14 C MOL A 1 -5.169 1.005 2.785 1.00 12.22 C

HETATM 15 C MOL A 1 -4.062 -0.526 3.788 1.00 11.10 C

HETATM 16 C MOL A 1 -3.436 2.610 2.108 1.00 11.12 C

HETATM 17 C MOL A 1 -2.170 -4.260 0.393 1.00 -0.55 C

HETATM 18 C MOL A 1 -0.355 1.187 3.127 1.00 12.16 C

HETATM 19 C MOL A 1 0.119 -4.123 -2.803 1.00 4.37 C

HETATM 20 C MOL A 1 0.411 -3.084 2.998 1.00 10.83 C

HETATM 21 C MOL A 1 0.607 -0.302 -3.338 1.00 6.60 C

HETATM 22 C MOL A 1 0.994 1.264 -0.662 1.00 8.88 C

HETATM 23 C MOL A 1 0.974 3.274 -1.069 1.00 7.14 C

HETATM 24 C MOL A 1 1.416 -5.218 -0.817 1.00 7.03 C

HETATM 25 C MOL A 1 1.443 -1.365 -3.871 1.00 5.97 C

HETATM 26 C MOL A 1 1.563 1.460 0.535 1.00 8.38 C

HETATM 27 C MOL A 1 2.215 3.537 -3.181 1.00 6.39 C

HETATM 28 C MOL A 1 2.840 -5.126 0.383 1.00 7.31 C

HETATM 29 C MOL A 1 2.840 3.195 2.376 1.00 8.82 C

HETATM 30 C MOL A 1 2.925 1.466 -2.939 1.00 6.54 C

HETATM 31 C MOL A 1 2.977 -0.536 3.922 1.00 8.50 C

HETATM 32 C MOL A 1 3.086 1.691 2.292 1.00 7.46 C

HETATM 33 C MOL A 1 3.384 6.524 0.058 1.00 6.87 C

HETATM 34 C MOL A 1 3.848 -4.189 -1.624 1.00 8.28 C

HETATM 35 C MOL A 1 4.413 -2.836 3.694 1.00 8.54 C

HETATM 36 C MOL A 1 4.810 6.441 -1.768 1.00 6.43 C

HETATM 37 C MOL A 1 5.076 0.838 -3.800 1.00 7.74 C

HETATM 38 C MOL A 1 5.201 -4.338 2.251 1.00 7.00 C

HETATM 39 C MOL A 1 5.286 6.045 1.086 1.00 6.13 C

HETATM 40 C MOL A 1 6.248 3.269 -3.460 1.00 5.89 C

HETATM 41 C MOL A 1 6.629 0.813 4.077 1.00 6.22 C

HETATM 42 C MOL A 1 7.420 -2.517 -0.507 1.00 7.69 C

HETATM 43 C MOL A 1 7.462 3.543 -1.605 1.00 8.04 C

HETATM 44 C MOL A 1 7.620 -1.701 1.426 1.00 6.27 C

HETATM 45 C MOL A 1 7.881 3.274 2.504 1.00 6.86 C

HETATM 46 C MOL A 1 8.127 -0.370 -1.141 1.00 7.42 C

HETATM 47 C MOL A 1 8.209 0.416 0.766 1.00 5.57 C

HETATM 1 O MOL A 1 -13.429 2.889 1.413 1.00 -1.90 O

HETATM 2 O MOL A 1 -11.327 -0.290 -0.686 1.00 -0.44 O

HETATM 3 O MOL A 1 -11.288 3.766 1.655 1.00 -1.52 O

HETATM 4 O MOL A 1 -10.181 3.672 1.569 1.00 -1.19 O

HETATM 5 O MOL A 1 -9.768 0.760 2.070 1.00 2.13 O

HETATM 6 O MOL A 1 -9.536 0.662 1.991 1.00 2.12 O

HETATM 7 O MOL A 1 -5.655 -2.822 -0.498 1.00-17.87 O

HETATM 8 O MOL A 1 -5.199 0.625 -2.320 1.00-17.80 O

HETATM 9 O MOL A 1 -2.779 -2.582 -3.563 1.00-40.34 O

HETATM 10 O MOL A 1 -2.551 1.067 3.808 1.00 4.11 O

HETATM 11 O MOL A 1 0.685 -0.610 3.712 1.00 4.00 O

HETATM 12 O MOL A 1 1.436 5.296 0.000 1.00 -1.36 O

HETATM 13 O MOL A 1 1.565 5.385 -0.534 1.00 -1.38 O

HETATM 14 O MOL A 1 1.517 5.377 -0.383 1.00 -1.37 O

HETATM 15 O MOL A 1 1.922 0.265 -3.074 1.00 1.14 O

HETATM 16 O MOL A 1 1.949 2.088 -1.137 1.00 2.72 O

HETATM 17 O MOL A 1 2.263 1.054 2.666 1.00 4.51 O

HETATM 18 O MOL A 1 2.231 5.218 -1.416 1.00 -1.61 O

HETATM 19 O MOL A 1 2.383 5.199 -1.510 1.00 -1.61 O

HETATM 20 O MOL A 1 2.502 -4.695 2.721 1.00 -0.78 O

HETATM 21 O MOL A 1 2.910 5.438 -2.233 1.00 -1.84 O

HETATM 22 O MOL A 1 3.006 5.499 -2.474 1.00 -1.85 O

HETATM 23 O MOL A 1 3.347 2.189 1.887 1.00 6.66 O

HETATM 24 O MOL A 1 4.172 5.028 -3.695 1.00 -2.12 O

HETATM 25 O MOL A 1 4.653 1.443 3.762 1.00 0.20 O

HETATM 26 O MOL A 1 4.905 -1.401 -3.738 1.00 -0.56 O

HETATM 27 O MOL A 1 5.072 -1.381 -3.648 1.00 -0.55 O

HETATM 28 O MOL A 1 5.905 3.071 3.353 1.00 -0.40 O

HETATM 29 O MOL A 1 5.920 3.270 3.311 1.00 -0.40 O

HETATM 30 O MOL A 1 6.010 -4.630 -0.086 1.00 -1.18 O

HETATM 31 O MOL A 1 6.394 -2.195 3.120 1.00 0.02 O

HETATM 32 O MOL A 1 6.492 5.433 -0.490 1.00 -0.41 O

HETATM 33 O MOL A 1 7.285 -0.606 0.536 1.00 3.65 O

HETATM 34 O MOL A 1 7.518 0.918 -3.077 1.00 -1.22 O

END

**Table SS 6**. DOCHN of local minima and maxima on the Electrostatic potentials (ESP) surface.

REMARK Unit of B-factor field (i.e. ESP) is kcal/mol

REMARK Carbon: Surface maximum Oxygen: surface minimum

HETATM 1 C MOL A 1 -10.108 -5.291 -1.272 1.00 5.37 C

HETATM 2 C MOL A 1 -9.157 -4.246 2.458 1.00 6.37 C

HETATM 3 C MOL A 1 -9.000 -8.059 1.173 1.00 6.39 C

HETATM 4 C MOL A 1 -8.458 -2.376 0.917 1.00 5.41 C

HETATM 5 C MOL A 1 -7.370 -3.331 -2.919 1.00 5.42 C

HETATM 6 C MOL A 1 -6.448 -6.935 -1.739 1.00 5.44 C

HETATM 7 C MOL A 1 -6.288 -0.822 1.040 1.00 5.97 C

HETATM 8 C MOL A 1 -5.647 -6.027 2.178 1.00 6.73 C

HETATM 9 C MOL A 1 -5.312 -4.512 2.234 1.00 6.05 C

HETATM 10 C MOL A 1 -5.302 -1.975 -2.820 1.00 5.70 C

HETATM 11 C MOL A 1 -4.422 -5.476 -1.575 1.00 5.67 C

HETATM 12 C MOL A 1 -4.326 0.751 0.946 1.00 7.34 C

HETATM 13 C MOL A 1 -3.948 4.065 0.929 1.00 10.43 C

HETATM 14 C MOL A 1 -4.017 6.367 1.002 1.00 10.53 C

HETATM 15 C MOL A 1 -3.925 1.934 -0.177 1.00 8.27 C

HETATM 16 C MOL A 1 -3.324 -2.852 2.407 1.00 6.23 C

HETATM 17 C MOL A 1 -3.214 -0.528 -2.707 1.00 6.15 C

HETATM 18 C MOL A 1 -2.278 -3.966 -1.410 1.00 6.26 C

HETATM 19 C MOL A 1 -2.244 9.934 0.604 1.00 10.20 C

HETATM 20 C MOL A 1 -1.802 0.968 2.751 1.00 7.31 C

HETATM 21 C MOL A 1 -1.322 -1.178 2.590 1.00 6.88 C

HETATM 22 C MOL A 1 -0.782 0.326 -2.748 1.00 5.54 C

HETATM 23 C MOL A 1 -0.661 6.283 -1.668 1.00-16.12 C

HETATM 24 C MOL A 1 -0.577 4.413 -1.663 1.00-15.42 C

HETATM 25 C MOL A 1 -0.508 -2.896 -0.976 1.00 6.67 C

HETATM 26 C MOL A 1 0.116 6.215 1.814 1.00-16.12 C

HETATM 27 C MOL A 1 0.182 4.378 1.716 1.00-15.41 C

HETATM 28 C MOL A 1 0.569 -2.865 0.756 1.00 6.68 C

HETATM 29 C MOL A 1 0.605 0.273 2.622 1.00 5.54 C

HETATM 30 C MOL A 1 1.253 -0.981 -2.770 1.00 6.88 C

HETATM 31 C MOL A 1 1.435 10.088 -0.270 1.00 10.20 C

HETATM 32 C MOL A 1 1.587 1.196 -2.844 1.00 7.31 C

HETATM 33 C MOL A 1 2.471 -3.834 1.160 1.00 6.28 C

HETATM 34 C MOL A 1 3.100 -0.423 2.550 1.00 6.16 C

HETATM 35 C MOL A 1 3.429 -2.537 -2.653 1.00 6.20 C

HETATM 36 C MOL A 1 3.471 6.706 -0.801 1.00 10.54 C

HETATM 37 C MOL A 1 3.541 4.397 -0.886 1.00 10.43 C

HETATM 38 C MOL A 1 3.659 2.232 0.119 1.00 8.27 C

HETATM 39 C MOL A 1 4.138 1.088 -1.063 1.00 7.35 C

HETATM 40 C MOL A 1 4.722 -5.217 1.236 1.00 5.73 C

HETATM 41 C MOL A 1 5.268 -1.650 2.597 1.00 5.75 C

HETATM 42 C MOL A 1 5.649 -3.881 -2.587 1.00 5.72 C

HETATM 43 C MOL A 1 6.202 -0.339 -1.221 1.00 6.03 C

HETATM 44 C MOL A 1 6.858 -6.569 1.244 1.00 5.52 C

HETATM 45 C MOL A 1 7.528 -3.040 2.668 1.00 5.45 C

HETATM 46 C MOL A 1 7.789 -5.231 -2.513 1.00 5.52 C

HETATM 47 C MOL A 1 8.423 -1.692 -1.142 1.00 5.51 C

HETATM 48 C MOL A 1 9.764 -4.362 2.710 1.00 6.26 C

HETATM 49 C MOL A 1 10.501 -7.015 -0.232 1.00 6.30 C

HETATM 50 C MOL A 1 10.662 -3.076 -1.057 1.00 6.27 C

HETATM 1 O MOL A 1 -9.734 -6.178 1.876 1.00 -1.74 O

HETATM 2 O MOL A 1 -8.565 -6.690 -1.733 1.00 -1.60 O

HETATM 3 O MOL A 1 -8.167 -6.496 2.879 1.00 -2.10 O

HETATM 4 O MOL A 1 -7.695 -2.086 -1.142 1.00 -1.89 O

HETATM 5 O MOL A 1 -6.962 -7.643 1.557 1.00 -1.57 O

HETATM 6 O MOL A 1 -7.038 -7.610 1.799 1.00 -1.56 O

HETATM 7 O MOL A 1 -6.882 -7.628 1.309 1.00 -1.58 O

HETATM 8 O MOL A 1 -6.769 -1.575 -1.108 1.00 -1.74 O

HETATM 9 O MOL A 1 -4.027 -4.825 0.524 1.00 -1.31 O

HETATM 10 O MOL A 1 -3.323 -4.293 0.598 1.00 -1.23 O

HETATM 11 O MOL A 1 -1.311 4.152 -1.678 1.00-16.55 O

HETATM 12 O MOL A 1 -1.187 7.117 -1.657 1.00-18.30 O

HETATM 13 O MOL A 1 -0.433 -1.085 -1.830 1.00 2.64 O

HETATM 14 O MOL A 1 -0.382 4.215 2.016 1.00-16.26 O

HETATM 15 O MOL A 1 -0.303 7.152 -1.860 1.00-18.28 O

HETATM 16 O MOL A 1 -0.289 7.079 2.040 1.00-18.28 O

HETATM 17 O MOL A 1 -0.068 4.295 -1.941 1.00-16.26 O

HETATM 18 O MOL A 1 0.435 -1.099 1.664 1.00 2.65 O

HETATM 19 O MOL A 1 0.598 7.077 1.833 1.00-18.30 O

HETATM 20 O MOL A 1 0.902 4.145 1.723 1.00-16.55 O

HETATM 21 O MOL A 1 2.823 2.336 -1.698 1.00 2.29 O

HETATM 22 O MOL A 1 3.534 -4.031 -0.887 1.00 -1.33 O

HETATM 23 O MOL A 1 4.748 -5.026 -0.942 1.00 -1.65 O

HETATM 24 O MOL A 1 5.483 -5.342 -0.860 1.00 -1.73 O

HETATM 25 O MOL A 1 6.519 -5.945 -0.833 1.00 -1.72 O

HETATM 26 O MOL A 1 6.677 -6.137 -0.861 1.00 -1.72 O

HETATM 27 O MOL A 1 6.680 -1.023 0.915 1.00 -1.69 O

HETATM 28 O MOL A 1 8.814 -2.296 0.990 1.00 -2.04 O

HETATM 29 O MOL A 1 9.779 -2.937 0.995 1.00 -2.16 O

HETATM 30 O MOL A 1 11.367 -4.753 0.756 1.00 -2.36 O

END

**Table SS 7**. PHPN of local minima and maxima on the Electrostatic potentials (ESP) surface

REMARK Unit of B-factor field (i.e. ESP) is kcal/mol

REMARK Carbon: Surface maximum Oxygen: surface minimum

HETATM 1 C MOL A 1 -12.592 -1.781 0.073 1.00 7.37 C

HETATM 2 C MOL A 1 -10.881 1.489 1.411 1.00 8.38 C

HETATM 3 C MOL A 1 -10.682 1.260 -2.030 1.00 9.45 C

HETATM 4 C MOL A 1 -10.391 2.636 1.499 1.00 9.13 C

HETATM 5 C MOL A 1 -9.551 -2.373 2.335 1.00 7.54 C

HETATM 6 C MOL A 1 -9.232 -3.350 -1.044 1.00 5.22 C

HETATM 7 C MOL A 1 -7.911 4.169 -1.435 1.00 9.42 C

HETATM 8 C MOL A 1 -7.663 -3.167 1.704 1.00 9.53 C

HETATM 9 C MOL A 1 -6.765 -0.471 -1.439 1.00-16.67 C

HETATM 10 C MOL A 1 -6.514 0.883 1.740 1.00-16.83 C

HETATM 11 C MOL A 1 -5.999 3.700 -1.396 1.00 9.74 C

HETATM 12 C MOL A 1 -5.255 -3.740 1.654 1.00 9.27 C

HETATM 13 C MOL A 1 -4.780 -0.875 -1.449 1.00-16.90 C

HETATM 14 C MOL A 1 -4.508 0.419 1.770 1.00-17.01 C

HETATM 15 C MOL A 1 -3.657 3.180 -1.431 1.00 10.31 C

HETATM 16 C MOL A 1 -3.027 -4.516 0.546 1.00 7.51 C

HETATM 17 C MOL A 1 -1.526 -2.220 3.147 1.00 6.83 C

HETATM 18 C MOL A 1 -1.138 0.161 -2.893 1.00 5.58 C

HETATM 19 C MOL A 1 -1.129 2.465 2.197 1.00 4.27 C

HETATM 20 C MOL A 1 -0.957 -2.354 -2.385 1.00 5.57 C

HETATM 21 C MOL A 1 -0.329 -0.073 2.683 1.00 5.06 C

HETATM 22 C MOL A 1 0.094 1.930 -3.152 1.00 5.78 C

HETATM 23 C MOL A 1 0.619 4.675 -0.090 1.00 5.84 C

HETATM 24 C MOL A 1 0.783 -3.548 0.717 1.00 7.89 C

HETATM 25 C MOL A 1 0.878 -0.538 -2.769 1.00 5.59 C

HETATM 26 C MOL A 1 1.167 1.749 2.427 1.00 5.18 C

HETATM 27 C MOL A 1 1.575 -3.414 -0.009 1.00 7.95 C

HETATM 28 C MOL A 1 1.956 -0.635 2.816 1.00 6.53 C

HETATM 29 C MOL A 1 2.454 1.358 -3.023 1.00 5.01 C

HETATM 30 C MOL A 1 2.947 4.159 0.006 1.00 5.43 C

HETATM 31 C MOL A 1 3.310 -1.694 -2.344 1.00 5.66 C

HETATM 32 C MOL A 1 3.466 -3.759 -0.015 1.00 7.74 C

HETATM 33 C MOL A 1 3.810 1.125 2.542 1.00 6.18 C

HETATM 34 C MOL A 1 4.339 -3.170 -2.482 1.00 10.63 C

HETATM 35 C MOL A 1 4.542 -0.851 2.883 1.00 8.06 C

HETATM 36 C MOL A 1 5.488 2.157 -0.783 1.00 0.85 C

HETATM 37 C MOL A 1 6.349 0.244 2.850 1.00 10.27 C

HETATM 38 C MOL A 1 7.054 2.712 1.346 1.00 5.31 C

HETATM 39 C MOL A 1 7.947 -2.821 -4.026 1.00 10.45 C

HETATM 40 C MOL A 1 8.570 0.247 3.257 1.00 7.92 C

HETATM 41 C MOL A 1 9.757 2.293 3.692 1.00 7.56 C

HETATM 42 C MOL A 1 9.908 1.998 -1.821 1.00 5.18 C

HETATM 43 C MOL A 1 10.144 4.914 0.623 1.00 7.14 C

HETATM 44 C MOL A 1 10.689 -0.869 -2.006 1.00 10.40 C

HETATM 45 C MOL A 1 11.371 -0.532 0.073 1.00 7.86 C

HETATM 46 C MOL A 1 12.428 1.596 0.692 1.00 7.52 C

HETATM 1 O MOL A 1 -10.014 3.835 -0.474 1.00 1.11 O

HETATM 2 O MOL A 1 -7.142 -1.016 -1.344 1.00-17.56 O

HETATM 3 O MOL A 1 -6.916 0.086 -1.835 1.00-17.77 O

HETATM 4 O MOL A 1 -6.929 0.482 2.131 1.00-17.83 O

HETATM 5 O MOL A 1 -6.611 1.590 1.633 1.00-17.85 O

HETATM 6 O MOL A 1 -4.669 -1.562 -1.327 1.00-17.88 O

HETATM 7 O MOL A 1 -4.440 -0.546 -1.752 1.00-17.49 O

HETATM 8 O MOL A 1 -4.382 -0.077 2.129 1.00-17.80 O

HETATM 9 O MOL A 1 -4.061 1.038 1.651 1.00-18.07 O

HETATM 10 O MOL A 1 -2.604 -3.629 2.228 1.00 1.08 O

HETATM 11 O MOL A 1 -0.559 -3.644 -0.884 1.00 0.28 O

HETATM 12 O MOL A 1 -0.418 1.431 1.953 1.00 2.23 O

HETATM 13 O MOL A 1 0.015 0.740 -2.517 1.00 3.36 O

HETATM 14 O MOL A 1 0.791 0.329 2.142 1.00 3.39 O

HETATM 15 O MOL A 1 1.260 1.039 -2.473 1.00 3.01 O

HETATM 16 O MOL A 1 2.295 -2.414 1.740 1.00 0.42 O

HETATM 17 O MOL A 1 2.307 0.811 2.072 1.00 2.85 O

HETATM 18 O MOL A 1 2.434 0.160 -2.341 1.00 2.43 O

HETATM 19 O MOL A 1 3.724 2.866 -1.798 1.00 -2.34 O

HETATM 20 O MOL A 1 6.812 0.148 -1.920 1.00-17.53 O

HETATM 21 O MOL A 1 7.759 -3.008 -0.195 1.00-18.20 O

HETATM 22 O MOL A 1 11.543 3.541 2.200 1.00 -1.28 O

END

**Table SS 8**. Squalane of local minima and maxima on the Electrostatic potentials (ESP) surface.

REMARK Unit of B-factor field (i.e. ESP) is kcal/mol

REMARK Carbon: Surface maximum Oxygen: surface minimum

HETATM 1 C MOL A 1 -15.523 0.077 1.146 1.00 5.91 C

HETATM 2 C MOL A 1 -15.328 -2.167 1.382 1.00 5.83 C

HETATM 3 C MOL A 1 -13.809 0.101 -2.550 1.00 5.63 C

HETATM 4 C MOL A 1 -13.620 -2.543 -2.269 1.00 5.49 C

HETATM 5 C MOL A 1 -12.450 2.533 0.261 1.00 6.08 C

HETATM 6 C MOL A 1 -11.922 -0.623 2.767 1.00 4.57 C

HETATM 7 C MOL A 1 -11.725 -4.044 0.987 1.00 5.82 C

HETATM 8 C MOL A 1 -11.600 -1.054 -2.825 1.00 4.44 C

HETATM 9 C MOL A 1 -11.358 2.455 -0.955 1.00 5.37 C

HETATM 10 C MOL A 1 -10.283 -3.008 0.520 1.00 3.81 C

HETATM 11 C MOL A 1 -10.049 0.719 2.336 1.00 5.09 C

HETATM 12 C MOL A 1 -9.966 -1.589 2.179 1.00 6.21 C

HETATM 13 C MOL A 1 -8.798 -1.284 -2.677 1.00 4.22 C

HETATM 14 C MOL A 1 -8.321 2.589 -1.643 1.00 5.01 C

HETATM 15 C MOL A 1 -7.929 -3.220 -0.880 1.00 5.77 C

HETATM 16 C MOL A 1 -7.690 1.703 1.980 1.00 4.28 C

HETATM 17 C MOL A 1 -6.304 -1.794 -2.232 1.00 4.51 C

HETATM 18 C MOL A 1 -6.308 2.326 -1.555 1.00 4.74 C

HETATM 19 C MOL A 1 -5.993 -2.056 2.340 1.00 6.57 C

HETATM 20 C MOL A 1 -5.230 1.713 2.090 1.00 4.90 C

HETATM 21 C MOL A 1 -5.046 -2.152 1.711 1.00 6.29 C

HETATM 22 C MOL A 1 -4.167 -1.983 2.407 1.00 6.56 C

HETATM 23 C MOL A 1 -3.919 2.403 -1.534 1.00 4.76 C

HETATM 24 C MOL A 1 -3.559 -1.679 -2.123 1.00 4.51 C

HETATM 25 C MOL A 1 -2.790 1.939 2.136 1.00 4.29 C

HETATM 26 C MOL A 1 -1.938 -2.907 -0.725 1.00 5.77 C

HETATM 27 C MOL A 1 -1.951 2.781 -1.548 1.00 4.85 C

HETATM 28 C MOL A 1 -0.868 -1.127 -2.208 1.00 4.59 C

HETATM 29 C MOL A 1 -0.470 2.524 2.081 1.00 4.84 C

HETATM 30 C MOL A 1 -0.157 -1.294 2.405 1.00 6.11 C

HETATM 31 C MOL A 1 0.425 3.532 -1.793 1.00 5.53 C

HETATM 32 C MOL A 1 0.817 -1.186 1.448 1.00 5.49 C

HETATM 33 C MOL A 1 1.203 3.800 -2.517 1.00 6.15 C

HETATM 34 C MOL A 1 1.543 -0.236 -2.424 1.00 4.78 C

HETATM 35 C MOL A 1 2.086 3.397 1.906 1.00 4.71 C

HETATM 36 C MOL A 1 3.134 5.173 0.608 1.00 5.67 C

HETATM 37 C MOL A 1 3.710 -0.610 1.461 1.00 5.79 C

HETATM 38 C MOL A 1 3.895 0.616 -2.682 1.00 4.25 C

HETATM 39 C MOL A 1 4.617 3.398 2.167 1.00 4.61 C

HETATM 40 C MOL A 1 5.258 4.198 -2.733 1.00 6.06 C

HETATM 41 C MOL A 1 5.893 -0.339 -1.910 1.00 4.88 C

HETATM 42 C MOL A 1 6.380 1.666 3.371 1.00 4.46 C

HETATM 43 C MOL A 1 6.418 3.369 -1.555 1.00 4.87 C

HETATM 44 C MOL A 1 6.455 4.445 0.750 1.00 4.18 C

HETATM 45 C MOL A 1 7.212 -1.791 1.343 1.00 5.44 C

HETATM 46 C MOL A 1 7.408 -2.229 0.356 1.00 5.87 C

HETATM 47 C MOL A 1 7.472 -3.027 -0.850 1.00 6.39 C

HETATM 48 C MOL A 1 7.727 1.503 -2.031 1.00 4.52 C

HETATM 49 C MOL A 1 8.852 2.701 3.368 1.00 5.33 C

HETATM 50 C MOL A 1 9.249 -0.164 -2.560 1.00 5.08 C

HETATM 51 C MOL A 1 9.569 -0.006 3.082 1.00 4.38 C

HETATM 52 C MOL A 1 9.859 -4.536 1.919 1.00 5.85 C

HETATM 53 C MOL A 1 10.201 -5.851 -1.934 1.00 6.07 C

HETATM 54 C MOL A 1 10.117 3.805 -0.358 1.00 5.66 C

HETATM 55 C MOL A 1 10.669 -2.138 -3.146 1.00 4.54 C

HETATM 56 C MOL A 1 10.746 -2.306 2.498 1.00 4.72 C

HETATM 57 C MOL A 1 11.284 1.891 -0.128 1.00 4.61 C

HETATM 58 C MOL A 1 12.469 -5.413 -2.049 1.00 5.97 C

HETATM 59 C MOL A 1 12.474 -4.133 1.825 1.00 5.62 C

HETATM 60 C MOL A 1 12.610 -0.100 -0.452 1.00 4.80 C

HETATM 61 C MOL A 1 13.932 -1.745 -1.147 1.00 5.98 C

HETATM 1 O MOL A 1 -14.959 -0.786 -0.830 1.00 -2.74 O

HETATM 2 O MOL A 1 -14.873 -1.581 -0.739 1.00 -2.72 O

HETATM 3 O MOL A 1 -14.729 1.505 -0.756 1.00 -2.75 O

HETATM 4 O MOL A 1 -14.061 -3.895 -0.165 1.00 -2.94 O

HETATM 5 O MOL A 1 -14.030 1.568 1.345 1.00 -2.03 O

HETATM 6 O MOL A 1 -12.892 -1.180 -2.005 1.00 1.85 O

HETATM 7 O MOL A 1 -11.837 -3.101 -1.079 1.00 -2.75 O

HETATM 8 O MOL A 1 -11.181 -2.660 -1.352 1.00 -2.72 O

HETATM 9 O MOL A 1 -10.388 2.188 0.821 1.00 -1.48 O

HETATM 10 O MOL A 1 -8.008 -3.221 1.541 1.00 -2.38 O

HETATM 11 O MOL A 1 -8.004 -1.281 2.867 1.00 -1.54 O

HETATM 12 O MOL A 1 -7.743 -1.642 -1.615 1.00 1.54 O

HETATM 13 O MOL A 1 -7.713 0.550 -2.470 1.00 -2.69 O

HETATM 14 O MOL A 1 -6.689 0.328 -2.557 1.00 -2.83 O

HETATM 15 O MOL A 1 -6.262 1.870 0.345 1.00 0.52 O

HETATM 16 O MOL A 1 -5.485 0.312 -2.384 1.00 -2.96 O

HETATM 17 O MOL A 1 -5.062 -0.328 2.398 1.00 -1.08 O

HETATM 18 O MOL A 1 -4.504 0.389 -2.351 1.00 -2.96 O

HETATM 19 O MOL A 1 -4.034 1.975 0.417 1.00 0.51 O

HETATM 20 O MOL A 1 -3.227 0.487 -2.399 1.00 -2.85 O

HETATM 21 O MOL A 1 -2.258 -1.400 -1.453 1.00 1.74 O

HETATM 22 O MOL A 1 -2.279 -0.889 3.042 1.00 -1.95 O

HETATM 23 O MOL A 1 -2.125 0.706 -2.353 1.00 -2.80 O

HETATM 24 O MOL A 1 -1.871 -2.930 1.789 1.00 -2.60 O

HETATM 25 O MOL A 1 -1.639 2.414 0.413 1.00 0.54 O

HETATM 26 O MOL A 1 -1.179 0.986 -2.507 1.00 -2.73 O

HETATM 27 O MOL A 1 -1.004 1.026 -2.472 1.00 -2.74 O

HETATM 28 O MOL A 1 1.857 1.191 2.034 1.00 -2.34 O

HETATM 29 O MOL A 1 3.124 5.394 -1.871 1.00 -2.77 O

HETATM 30 O MOL A 1 3.275 3.564 -3.313 1.00 -2.07 O

HETATM 31 O MOL A 1 3.453 3.660 1.151 1.00 1.81 O

HETATM 32 O MOL A 1 4.434 -0.838 -0.482 1.00 -1.62 O

HETATM 33 O MOL A 1 4.731 5.001 -0.747 1.00 -2.33 O

HETATM 34 O MOL A 1 5.426 1.725 -1.908 1.00 0.82 O

HETATM 35 O MOL A 1 5.584 1.645 -1.829 1.00 0.82 O

HETATM 36 O MOL A 1 5.822 1.566 -1.747 1.00 0.82 O

HETATM 37 O MOL A 1 7.172 -0.163 2.969 1.00 -1.94 O

HETATM 38 O MOL A 1 7.754 -1.025 -1.370 1.00 -1.28 O

HETATM 39 O MOL A 1 8.616 -5.378 -0.036 1.00 -2.55 O

HETATM 40 O MOL A 1 8.557 4.554 1.656 1.00 -3.11 O

HETATM 41 O MOL A 1 8.659 -4.376 -2.120 1.00 -1.85 O

HETATM 42 O MOL A 1 9.791 1.217 -1.205 1.00 0.62 O

HETATM 43 O MOL A 1 10.181 2.850 1.693 1.00 -2.86 O

HETATM 44 O MOL A 1 10.943 -5.403 0.176 1.00 -2.55 O

HETATM 45 O MOL A 1 11.064 -3.495 1.550 1.00 2.13 O

HETATM 46 O MOL A 1 11.045 -0.482 -1.582 1.00 0.63 O

HETATM 47 O MOL A 1 11.114 0.622 1.686 1.00 -2.93 O

HETATM 48 O MOL A 1 11.583 -0.436 1.541 1.00 -2.85 O

HETATM 49 O MOL A 1 11.730 -5.290 0.112 1.00 -2.56 O

HETATM 50 O MOL A 1 13.006 -2.228 0.866 1.00 -2.64 O

HETATM 51 O MOL A 1 13.960 -4.251 -0.244 1.00 -2.82 O

END

**Table SS 9**. Hopane of local minima and maxima on the Electrostatic potentials (ESP) surface.

REMARK Unit of B-factor field (i.e. ESP) is kcal/mol

REMARK Carbon: Surface maximum Oxygen: surface minimum

HETATM 1 C MOL A 1 -9.734 1.875 1.604 1.00 5.18 C

HETATM 2 C MOL A 1 -9.642 0.695 -1.168 1.00 4.79 C

HETATM 3 C MOL A 1 -9.601 2.659 -0.396 1.00 5.65 C

HETATM 4 C MOL A 1 -7.959 -2.619 -2.195 1.00 5.23 C

HETATM 5 C MOL A 1 -7.703 -1.395 2.156 1.00 6.46 C

HETATM 6 C MOL A 1 -7.169 -0.163 3.505 1.00 4.38 C

HETATM 7 C MOL A 1 -6.487 1.909 -2.885 1.00 6.59 C

HETATM 8 C MOL A 1 -6.262 3.750 2.468 1.00 5.58 C

HETATM 9 C MOL A 1 -5.946 -3.563 0.409 1.00 4.47 C

HETATM 10 C MOL A 1 -5.932 4.489 0.171 1.00 6.68 C

HETATM 11 C MOL A 1 -4.730 0.373 -2.984 1.00 7.41 C

HETATM 12 C MOL A 1 -4.263 -3.373 2.321 1.00 6.70 C

HETATM 13 C MOL A 1 -4.295 0.436 3.738 1.00 5.51 C

HETATM 14 C MOL A 1 -4.194 2.264 2.390 1.00 3.89 C

HETATM 15 C MOL A 1 -2.196 2.909 1.842 1.00 7.03 C

HETATM 16 C MOL A 1 -1.944 -2.710 -2.196 1.00 7.48 C

HETATM 17 C MOL A 1 -1.890 3.059 -2.362 1.00 4.49 C

HETATM 18 C MOL A 1 -1.028 -0.829 3.312 1.00 6.94 C

HETATM 19 C MOL A 1 -0.733 0.876 -3.480 1.00 7.28 C

HETATM 20 C MOL A 1 -0.511 -4.532 0.665 1.00 4.39 C

HETATM 21 C MOL A 1 -0.304 3.602 -0.387 1.00 4.48 C

HETATM 22 C MOL A 1 0.102 -1.841 3.303 1.00 6.15 C

HETATM 23 C MOL A 1 0.616 -3.431 -2.411 1.00 5.53 C

HETATM 24 C MOL A 1 0.856 -1.265 -3.122 1.00 4.30 C

HETATM 25 C MOL A 1 1.540 -4.564 1.378 1.00 5.15 C

HETATM 26 C MOL A 1 1.946 1.479 2.002 1.00 7.86 C

HETATM 27 C MOL A 1 2.941 2.543 -2.410 1.00 6.01 C

HETATM 28 C MOL A 1 3.191 -1.546 -3.809 1.00 4.08 C

HETATM 29 C MOL A 1 4.083 -2.251 1.924 1.00 6.58 C

HETATM 30 C MOL A 1 4.204 -4.182 -2.298 1.00 5.43 C

HETATM 31 C MOL A 1 4.309 2.664 0.489 1.00 4.03 C

HETATM 32 C MOL A 1 4.805 -0.334 -4.426 1.00 5.28 C

HETATM 33 C MOL A 1 6.202 0.986 3.261 1.00 4.28 C

HETATM 34 C MOL A 1 6.446 -2.087 -1.492 1.00 3.58 C

HETATM 35 C MOL A 1 6.751 -2.365 1.037 1.00 4.55 C

HETATM 36 C MOL A 1 6.928 3.250 0.028 1.00 4.54 C

HETATM 37 C MOL A 1 7.121 1.824 -2.369 1.00 3.58 C

HETATM 38 C MOL A 1 7.898 -0.162 -2.019 1.00 4.74 C

HETATM 39 C MOL A 1 8.530 1.739 3.216 1.00 4.62 C

HETATM 40 C MOL A 1 9.309 3.824 0.077 1.00 4.80 C

HETATM 41 C MOL A 1 9.395 -1.705 1.127 1.00 4.66 C

HETATM 42 C MOL A 1 10.163 0.403 -2.010 1.00 4.88 C

HETATM 43 C MOL A 1 11.035 2.341 3.236 1.00 5.71 C

HETATM 44 C MOL A 1 11.932 -1.068 1.207 1.00 5.72 C

HETATM 45 C MOL A 1 13.038 2.505 -0.226 1.00 5.81 C

HETATM 1 O MOL A 1 -9.344 -0.353 0.597 1.00 -1.90 O

HETATM 2 O MOL A 1 -8.222 3.396 1.610 1.00 -2.96 O

HETATM 3 O MOL A 1 -8.074 2.252 3.391 1.00 -3.17 O

HETATM 4 O MOL A 1 -7.817 3.852 -1.649 1.00 -2.64 O

HETATM 5 O MOL A 1 -7.494 -0.737 -3.059 1.00 -1.56 O

HETATM 6 O MOL A 1 -5.284 -1.700 3.742 1.00 -2.44 O

HETATM 7 O MOL A 1 -4.909 -3.224 -1.342 1.00 -1.90 O

HETATM 8 O MOL A 1 -4.503 2.904 -2.374 1.00 -1.43 O

HETATM 9 O MOL A 1 -4.322 3.150 0.825 1.00 1.46 O

HETATM 10 O MOL A 1 -3.987 -3.528 0.153 1.00 -2.01 O

HETATM 11 O MOL A 1 -3.160 1.389 2.071 1.00 1.70 O

HETATM 12 O MOL A 1 -2.559 -0.791 -3.759 1.00 -1.77 O

HETATM 13 O MOL A 1 -2.218 3.656 -0.424 1.00 -1.39 O

HETATM 14 O MOL A 1 -0.993 -3.528 2.347 1.00 -1.63 O

HETATM 15 O MOL A 1 -0.432 1.643 3.215 1.00 -2.46 O

HETATM 16 O MOL A 1 0.018 2.742 -2.210 1.00 -1.26 O

HETATM 17 O MOL A 1 0.809 -0.044 3.100 1.00 -2.53 O

HETATM 18 O MOL A 1 2.236 -0.833 3.410 1.00 -2.55 O

HETATM 19 O MOL A 1 2.232 2.879 -0.469 1.00 -1.36 O

HETATM 20 O MOL A 1 3.001 -4.518 -0.305 1.00 -2.45 O

HETATM 21 O MOL A 1 4.032 1.155 1.918 1.00 -1.74 O

HETATM 22 O MOL A 1 4.706 -2.307 -2.418 1.00 -0.13 O

HETATM 23 O MOL A 1 5.326 1.997 -3.559 1.00 -3.38 O

HETATM 24 O MOL A 1 7.332 -0.741 2.486 1.00 -2.93 O

HETATM 25 O MOL A 1 7.330 -1.232 -0.465 1.00 0.32 O

HETATM 26 O MOL A 1 8.278 -0.432 2.583 1.00 -2.87 O

HETATM 27 O MOL A 1 8.754 2.699 1.556 1.00 0.37 O

HETATM 28 O MOL A 1 9.186 2.267 -1.461 1.00 -2.36 O

HETATM 29 O MOL A 1 9.507 -0.155 2.671 1.00 -2.83 O

HETATM 30 O MOL A 1 10.041 -0.569 -0.293 1.00 0.47 O

HETATM 31 O MOL A 1 10.695 0.203 2.589 1.00 -2.81 O

HETATM 32 O MOL A 1 12.909 1.170 1.946 1.00 -2.85 O

END

**Table SS 10**. Phenol of local minima and maxima on the Electrostatic potentials (ESP) surface.

REMARK Unit of B-factor field (i.e. ESP) is kcal/mol

REMARK Carbon: Surface maximum Oxygen: surface minimum

HETATM 1 C MOL A 1 -11.056 -2.123 1.402 1.00 8.43 C

HETATM 2 C MOL A 1 -10.090 -4.343 1.013 1.00 9.02 C

HETATM 3 C MOL A 1 -8.820 2.561 -0.000 1.00 8.05 C

HETATM 4 C MOL A 1 -8.587 -0.378 -1.381 1.00 8.99 C

HETATM 5 C MOL A 1 -8.596 1.102 2.203 1.00 8.64 C

HETATM 6 C MOL A 1 -8.233 -2.649 3.797 1.00 6.51 C

HETATM 7 C MOL A 1 -7.627 0.589 -0.971 1.00 8.82 C

HETATM 8 C MOL A 1 -7.477 4.383 -3.371 1.00 7.21 C

HETATM 9 C MOL A 1 -7.454 1.380 1.418 1.00 8.26 C

HETATM 10 C MOL A 1 -7.064 -3.070 -1.676 1.00 10.41 C

HETATM 11 C MOL A 1 -6.873 0.660 2.606 1.00 6.25 C

HETATM 12 C MOL A 1 -6.045 5.481 0.294 1.00 7.87 C

HETATM 13 C MOL A 1 -5.843 -4.579 0.561 1.00 15.66 C

HETATM 14 C MOL A 1 -4.626 -5.376 -0.343 1.00 50.00 C

HETATM 15 C MOL A 1 -4.226 3.991 1.168 1.00 8.62 C

HETATM 16 C MOL A 1 -3.938 3.948 -1.980 1.00 4.57 C

HETATM 17 C MOL A 1 -3.116 -0.220 1.784 1.00-15.87 C

HETATM 18 C MOL A 1 -3.095 0.107 -1.673 1.00-15.93 C

HETATM 19 C MOL A 1 -2.304 4.030 0.657 1.00 13.43 C

HETATM 20 C MOL A 1 -2.223 -2.197 1.575 1.00-14.89 C

HETATM 21 C MOL A 1 -2.229 -1.882 -1.847 1.00-14.77 C

HETATM 22 C MOL A 1 -1.431 6.283 -0.364 1.00 6.98 C

HETATM 23 C MOL A 1 -0.847 5.423 1.495 1.00 8.16 C

HETATM 24 C MOL A 1 -0.694 0.045 -1.650 1.00-11.34 C

HETATM 25 C MOL A 1 -0.600 -0.451 1.691 1.00-11.41 C

HETATM 26 C MOL A 1 -0.257 3.428 -2.727 1.00 -0.78 C

HETATM 27 C MOL A 1 0.152 7.893 0.942 1.00 7.01 C

HETATM 28 C MOL A 1 0.896 1.952 -1.409 1.00-15.18 C

HETATM 29 C MOL A 1 0.951 1.296 1.973 1.00-15.86 C

HETATM 30 C MOL A 1 1.093 -4.363 -0.653 1.00 12.03 C

HETATM 31 C MOL A 1 1.260 6.692 -3.501 1.00 5.79 C

HETATM 32 C MOL A 1 1.729 0.019 -1.784 1.00-15.39 C

HETATM 33 C MOL A 1 1.904 -0.601 1.646 1.00-15.25 C

HETATM 34 C MOL A 1 2.703 8.048 -2.239 1.00 6.76 C

HETATM 35 C MOL A 1 3.448 4.905 2.008 1.00 7.70 C

HETATM 36 C MOL A 1 3.887 4.428 -1.009 1.00 5.15 C

HETATM 37 C MOL A 1 3.996 6.629 1.366 1.00 7.51 C

HETATM 38 C MOL A 1 4.218 -4.236 0.939 1.00 5.76 C

HETATM 39 C MOL A 1 4.268 -5.376 -4.384 1.00 6.22 C

HETATM 40 C MOL A 1 4.208 -1.559 -3.900 1.00 3.71 C

HETATM 41 C MOL A 1 4.372 3.364 0.627 1.00 10.77 C

HETATM 42 C MOL A 1 4.925 -5.775 -0.397 1.00 6.80 C

HETATM 43 C MOL A 1 5.411 -1.721 2.638 1.00 4.20 C

HETATM 44 C MOL A 1 5.475 1.851 -1.715 1.00 6.88 C

HETATM 45 C MOL A 1 6.015 -0.491 -2.792 1.00 5.79 C

HETATM 46 C MOL A 1 6.753 1.940 2.056 1.00 6.49 C

HETATM 47 C MOL A 1 7.168 -3.362 -2.540 1.00 7.25 C

HETATM 48 C MOL A 1 7.342 -3.309 -0.569 1.00 7.55 C

HETATM 49 C MOL A 1 7.446 -1.807 3.301 1.00 5.62 C

HETATM 50 C MOL A 1 7.624 0.824 -1.750 1.00 6.34 C

HETATM 51 C MOL A 1 8.015 -2.951 -0.529 1.00 7.26 C

HETATM 52 C MOL A 1 9.200 1.603 2.734 1.00 5.88 C

HETATM 53 C MOL A 1 9.840 -2.118 3.919 1.00 6.40 C

HETATM 54 C MOL A 1 10.144 0.494 -1.072 1.00 5.95 C

HETATM 55 C MOL A 1 10.698 -3.180 0.115 1.00 6.70 C

HETATM 56 C MOL A 1 12.709 -0.119 1.905 1.00 6.54 C

HETATM 1 O MOL A 1 -10.401 0.144 0.820 1.00 -0.09 O

HETATM 2 O MOL A 1 -10.443 0.142 1.032 1.00 -0.07 O

HETATM 3 O MOL A 1 -10.362 0.105 0.581 1.00 -0.09 O

HETATM 4 O MOL A 1 -9.427 -2.899 -0.559 1.00 1.03 O

HETATM 5 O MOL A 1 -8.252 -4.803 1.965 1.00 1.49 O

HETATM 6 O MOL A 1 -8.172 5.024 -1.121 1.00 -1.02 O

HETATM 7 O MOL A 1 -6.763 5.559 -1.767 1.00 -0.69 O

HETATM 8 O MOL A 1 -6.446 5.474 -1.847 1.00 -0.69 O

HETATM 9 O MOL A 1 -2.980 -1.959 -2.039 1.00-16.09 O

HETATM 10 O MOL A 1 -2.901 -2.257 1.771 1.00-16.06 O

HETATM 11 O MOL A 1 -2.696 0.585 2.061 1.00-17.79 O

HETATM 12 O MOL A 1 -2.637 0.972 -1.785 1.00-17.85 O

HETATM 13 O MOL A 1 -1.338 -2.185 -2.137 1.00-16.90 O

HETATM 14 O MOL A 1 -1.278 -6.069 -0.242 1.00-26.17 O

HETATM 15 O MOL A 1 -1.213 -2.523 1.781 1.00-17.40 O

HETATM 16 O MOL A 1 0.175 1.551 2.236 1.00-17.44 O

HETATM 17 O MOL A 1 0.146 1.846 -1.616 1.00-16.08 O

HETATM 18 O MOL A 1 1.113 -0.845 -2.147 1.00-17.60 O

HETATM 19 O MOL A 1 1.101 0.339 2.037 1.00-16.51 O

HETATM 20 O MOL A 1 1.043 0.820 -1.839 1.00-16.33 O

HETATM 21 O MOL A 1 1.188 4.300 -3.139 1.00 -4.50 O

HETATM 22 O MOL A 1 1.338 1.766 2.191 1.00-16.90 O

HETATM 23 O MOL A 1 1.381 -1.466 1.688 1.00-17.09 O

HETATM 24 O MOL A 1 1.538 2.105 -1.569 1.00-16.12 O

HETATM 25 O MOL A 1 2.335 8.713 0.082 1.00 -1.71 O

HETATM 26 O MOL A 1 4.290 -6.165 -2.391 1.00 -1.59 O

HETATM 27 O MOL A 1 5.713 -3.864 -4.103 1.00 -1.40 O

HETATM 28 O MOL A 1 5.826 -5.814 -2.678 1.00 -1.81 O

HETATM 29 O MOL A 1 6.024 -4.416 -3.972 1.00 -1.34 O

HETATM 30 O MOL A 1 6.409 0.225 -1.839 1.00 4.24 O

HETATM 31 O MOL A 1 7.062 -0.019 2.641 1.00 1.89 O

HETATM 32 O MOL A 1 7.187 -1.659 -1.760 1.00 0.74 O

HETATM 33 O MOL A 1 8.225 1.609 0.285 1.00 -0.88 O

HETATM 34 O MOL A 1 9.779 -3.144 2.054 1.00 -1.67 O

HETATM 35 O MOL A 1 9.824 1.656 0.701 1.00 -1.20 O

HETATM 36 O MOL A 1 10.065 1.609 0.779 1.00 -1.20 O

HETATM 37 O MOL A 1 11.834 -2.515 2.373 1.00 -2.11 O

END

**Table SS 11**. Pyrrole of local minima and maxima on the Electrostatic potentials (ESP) surface.

REMARK Unit of B-factor field (i.e. ESP) is kcal/mol

REMARK Carbon: Surface maximum Oxygen: surface minimum

HETATM 1 C MOL A 1 -13.079 -2.868 -0.276 1.00 7.11 C

HETATM 2 C MOL A 1 -11.670 -5.498 2.587 1.00 7.72 C

HETATM 3 C MOL A 1 -11.020 -6.190 -1.215 1.00 7.32 C

HETATM 4 C MOL A 1 -10.795 -6.374 2.512 1.00 7.81 C

HETATM 5 C MOL A 1 -10.187 6.882 -0.293 1.00 6.85 C

HETATM 6 C MOL A 1 -9.990 -1.758 2.189 1.00 6.15 C

HETATM 7 C MOL A 1 -9.540 -2.484 -1.738 1.00 6.38 C

HETATM 8 C MOL A 1 -8.872 8.938 0.047 1.00 6.67 C

HETATM 9 C MOL A 1 -8.808 -3.198 3.850 1.00 6.87 C

HETATM 10 C MOL A 1 -8.426 -6.222 -0.924 1.00 6.62 C

HETATM 11 C MOL A 1 -8.422 3.212 0.351 1.00 7.55 C

HETATM 12 C MOL A 1 -7.989 6.416 2.689 1.00 4.90 C

HETATM 13 C MOL A 1 -7.847 -2.325 -1.528 1.00 6.07 C

HETATM 14 C MOL A 1 -7.703 -1.702 2.227 1.00 6.07 C

HETATM 15 C MOL A 1 -7.360 5.229 -2.794 1.00 7.01 C

HETATM 16 C MOL A 1 -7.190 2.850 -0.198 1.00 7.42 C

HETATM 17 C MOL A 1 -7.016 -0.826 -0.219 1.00 9.19 C

HETATM 18 C MOL A 1 -6.756 3.206 1.064 1.00 5.69 C

HETATM 19 C MOL A 1 -6.622 -6.294 2.644 1.00 9.19 C

HETATM 20 C MOL A 1 -6.594 4.102 -2.425 1.00 6.80 C

HETATM 21 C MOL A 1 -6.018 -6.350 -0.810 1.00 9.33 C

HETATM 22 C MOL A 1 -6.016 1.322 2.016 1.00 4.63 C

HETATM 23 C MOL A 1 -5.858 -5.738 2.686 1.00 9.41 C

HETATM 24 C MOL A 1 -5.865 7.600 -2.426 1.00 6.69 C

HETATM 25 C MOL A 1 -5.442 1.658 -3.262 1.00 3.98 C

HETATM 26 C MOL A 1 -5.013 -6.935 -0.864 1.00 9.71 C

HETATM 27 C MOL A 1 -4.989 8.713 1.233 1.00 6.49 C

HETATM 28 C MOL A 1 -4.844 -6.059 2.745 1.00 8.89 C

HETATM 29 C MOL A 1 -4.499 6.912 1.958 1.00 3.93 C

HETATM 30 C MOL A 1 -4.187 7.302 -1.694 1.00 6.74 C

HETATM 31 C MOL A 1 -3.543 -8.902 -0.728 1.00 9.49 C

HETATM 32 C MOL A 1 -3.352 -2.413 1.751 1.00-18.47 C

HETATM 33 C MOL A 1 -3.251 -8.120 3.253 1.00 8.14 C

HETATM 34 C MOL A 1 -2.934 7.395 -0.576 1.00 8.04 C

HETATM 35 C MOL A 1 -2.762 3.558 1.327 1.00-18.71 C

HETATM 36 C MOL A 1 -2.688 -0.889 -2.013 1.00-15.72 C

HETATM 37 C MOL A 1 -2.280 -0.722 1.415 1.00-17.88 C

HETATM 38 C MOL A 1 -1.787 7.438 1.548 1.00 4.46 C

HETATM 39 C MOL A 1 -1.512 1.402 1.457 1.00-15.18 C

HETATM 40 C MOL A 1 -1.193 1.482 -1.953 1.00-15.30 C

HETATM 41 C MOL A 1 -0.949 -6.118 -1.513 1.00 16.03 C

HETATM 42 C MOL A 1 -0.672 -5.699 2.540 1.00 3.75 C

HETATM 43 C MOL A 1 -0.336 9.786 -0.443 1.00 6.40 C

HETATM 44 C MOL A 1 -0.056 -0.244 -2.157 1.00-16.49 C

HETATM 45 C MOL A 1 -0.009 -1.144 1.197 1.00-16.55 C

HETATM 46 C MOL A 1 0.064 -8.841 0.822 1.00 8.58 C

HETATM 47 C MOL A 1 0.122 -6.413 -3.254 1.00 46.45 C

HETATM 48 C MOL A 1 0.312 4.887 3.125 1.00 3.20 C

HETATM 49 C MOL A 1 0.845 0.977 1.786 1.00-18.32 C

HETATM 50 C MOL A 1 1.258 -3.366 0.332 1.00-16.18 C

HETATM 51 C MOL A 1 1.420 -1.849 -2.763 1.00-17.99 C

HETATM 52 C MOL A 1 1.501 1.877 -1.483 1.00-18.54 C

HETATM 53 C MOL A 1 1.542 5.485 -1.993 1.00 2.55 C

HETATM 54 C MOL A 1 1.779 7.136 -2.579 1.00 5.68 C

HETATM 55 C MOL A 1 2.228 -1.133 1.315 1.00-18.47 C

HETATM 56 C MOL A 1 2.244 7.054 1.003 1.00 6.58 C

HETATM 57 C MOL A 1 2.464 1.548 4.298 1.00 0.81 C

HETATM 58 C MOL A 1 2.543 0.007 -1.914 1.00-18.88 C

HETATM 59 C MOL A 1 3.026 5.695 0.917 1.00 8.03 C

HETATM 60 C MOL A 1 3.496 5.056 -0.991 1.00 3.78 C

HETATM 61 C MOL A 1 4.292 6.092 1.946 1.00 5.97 C

HETATM 62 C MOL A 1 5.309 6.168 -1.742 1.00 5.50 C

HETATM 63 C MOL A 1 5.546 3.544 3.902 1.00 5.09 C

HETATM 64 C MOL A 1 5.782 -4.017 0.193 1.00 4.53 C

HETATM 65 C MOL A 1 5.905 1.268 0.847 1.00 4.77 C

HETATM 66 C MOL A 1 6.025 -4.233 -1.792 1.00 10.77 C

HETATM 67 C MOL A 1 6.282 -0.334 2.354 1.00 4.72 C

HETATM 68 C MOL A 1 6.677 1.253 -0.988 1.00 5.48 C

HETATM 69 C MOL A 1 7.018 3.170 2.690 1.00 5.07 C

HETATM 70 C MOL A 1 7.484 -3.992 0.948 1.00 5.37 C

HETATM 71 C MOL A 1 7.787 2.920 -1.147 1.00 5.91 C

HETATM 72 C MOL A 1 7.964 -2.308 -2.628 1.00 5.66 C

HETATM 73 C MOL A 1 8.245 6.324 0.985 1.00 5.91 C

HETATM 74 C MOL A 1 8.594 -0.307 2.693 1.00 5.53 C

HETATM 75 C MOL A 1 8.986 1.117 -0.963 1.00 5.33 C

HETATM 76 C MOL A 1 9.474 0.558 2.764 1.00 6.13 C

HETATM 77 C MOL A 1 10.087 -3.906 1.473 1.00 4.90 C

HETATM 78 C MOL A 1 10.382 -2.332 -2.291 1.00 5.18 C

HETATM 79 C MOL A 1 11.443 -2.861 3.295 1.00 5.72 C

HETATM 80 C MOL A 1 11.494 1.051 -0.833 1.00 4.35 C

HETATM 81 C MOL A 1 12.447 -2.363 -2.300 1.00 5.13 C

HETATM 82 C MOL A 1 12.718 -3.963 1.419 1.00 4.84 C

HETATM 83 C MOL A 1 13.574 0.452 2.737 1.00 6.22 C

HETATM 84 C MOL A 1 13.990 1.040 -0.960 1.00 5.89 C

HETATM 85 C MOL A 1 14.518 -0.507 2.652 1.00 6.38 C

HETATM 86 C MOL A 1 15.888 -2.492 -0.602 1.00 6.07 C

HETATM 1 O MOL A 1 -12.888 -5.294 0.183 1.00 -1.38 O

HETATM 2 O MOL A 1 -12.738 -3.715 1.666 1.00 -0.82 O

HETATM 3 O MOL A 1 -10.237 -1.577 0.059 1.00 -0.58 O

HETATM 4 O MOL A 1 -9.524 4.818 -1.548 1.00 -1.64 O

HETATM 5 O MOL A 1 -8.904 -5.616 4.009 1.00 -1.15 O

HETATM 6 O MOL A 1 -8.825 -2.599 2.385 1.00 3.87 O

HETATM 7 O MOL A 1 -8.650 6.885 -1.863 1.00 -1.45 O

HETATM 8 O MOL A 1 -8.003 7.921 -1.702 1.00 -1.55 O

HETATM 9 O MOL A 1 -6.798 0.710 0.852 1.00 1.55 O

HETATM 10 O MOL A 1 -6.498 2.205 -2.257 1.00 0.70 O

HETATM 11 O MOL A 1 -6.474 9.454 -0.674 1.00 -2.03 O

HETATM 12 O MOL A 1 -4.428 -2.774 -1.758 1.00-16.83 O

HETATM 13 O MOL A 1 -3.770 -2.227 1.903 1.00-18.87 O

HETATM 14 O MOL A 1 -3.337 -1.534 -2.114 1.00-16.43 O

HETATM 15 O MOL A 1 -2.696 4.104 1.436 1.00-19.18 O

HETATM 16 O MOL A 1 -2.537 3.136 1.512 1.00-18.92 O

HETATM 17 O MOL A 1 -2.449 -2.318 1.798 1.00-19.48 O

HETATM 18 O MOL A 1 -2.397 0.056 1.588 1.00-18.88 O

HETATM 19 O MOL A 1 -2.234 3.941 -2.204 1.00-19.23 O

HETATM 20 O MOL A 1 -1.816 2.998 -2.174 1.00-19.12 O

HETATM 21 O MOL A 1 -1.797 -9.469 2.129 1.00 -0.12 O

HETATM 22 O MOL A 1 -1.324 -0.321 -2.390 1.00-18.78 O

HETATM 23 O MOL A 1 -1.285 -0.934 1.511 1.00-19.79 O

HETATM 24 O MOL A 1 -1.066 -8.059 2.702 1.00 -0.35 O

HETATM 25 O MOL A 1 -0.159 -5.661 0.529 1.00 -1.13 O

HETATM 26 O MOL A 1 -0.061 0.942 1.806 1.00-19.49 O

HETATM 27 O MOL A 1 0.230 6.954 2.098 1.00 -1.45 O

HETATM 28 O MOL A 1 0.486 -1.445 -2.805 1.00-19.78 O

HETATM 29 O MOL A 1 1.420 -0.347 1.768 1.00-19.77 O

HETATM 30 O MOL A 1 1.731 -2.045 1.193 1.00-19.67 O

HETATM 31 O MOL A 1 1.848 -0.658 -2.463 1.00-20.47 O

HETATM 32 O MOL A 1 2.940 -1.135 1.585 1.00-20.00 O

HETATM 33 O MOL A 1 3.019 -4.701 0.034 1.00-18.14 O

HETATM 34 O MOL A 1 3.239 0.373 -1.906 1.00-20.21 O

HETATM 35 O MOL A 1 5.829 3.958 -1.755 1.00 -3.57 O

HETATM 36 O MOL A 1 6.235 5.097 2.700 1.00 -1.43 O

HETATM 37 O MOL A 1 7.464 5.215 -1.838 1.00 -2.94 O

HETATM 38 O MOL A 1 8.184 0.780 0.998 1.00 -1.38 O

HETATM 39 O MOL A 1 8.647 -0.583 -1.719 1.00 1.17 O

HETATM 40 O MOL A 1 8.808 -0.661 -1.715 1.00 1.17 O

HETATM 41 O MOL A 1 10.565 -0.571 -1.458 1.00 0.85 O

HETATM 42 O MOL A 1 10.964 -3.579 -0.508 1.00 -2.23 O

HETATM 43 O MOL A 1 11.452 -3.160 1.707 1.00 2.05 O

HETATM 44 O MOL A 1 11.445 -0.411 3.945 1.00 -2.76 O

HETATM 45 O MOL A 1 11.530 1.191 2.831 1.00 -2.00 O

HETATM 46 O MOL A 1 11.495 1.297 2.255 1.00 -2.03 O

HETATM 47 O MOL A 1 11.531 1.284 2.458 1.00 -2.03 O

HETATM 48 O MOL A 1 11.903 -3.596 -0.520 1.00 -2.21 O

HETATM 49 O MOL A 1 15.358 -2.167 1.425 1.00 -1.96 O

HETATM 50 O MOL A 1 15.730 -0.176 0.364 1.00 -2.59 O

END

**Table SS 12**. Thioisorenieratane of local minima and maxima on the Electrostatic potentials (ESP) surface.

REMARK Unit of B-factor field (i.e. ESP) is kcal/mol

REMARK Carbon: Surface maximum Oxygen: surface minimum

HETATM 1 C MOL A 1 -12.939 -1.229 -0.609 1.00 8.46 C

HETATM 2 C MOL A 1 -12.352 -2.921 -0.795 1.00 8.29 C

HETATM 3 C MOL A 1 -12.234 2.793 0.260 1.00 8.51 C

HETATM 4 C MOL A 1 -11.222 4.115 0.549 1.00 8.54 C

HETATM 5 C MOL A 1 -8.913 -4.104 1.128 1.00 7.93 C

HETATM 6 C MOL A 1 -8.602 -3.325 -2.556 1.00 8.27 C

HETATM 7 C MOL A 1 -7.919 3.425 2.863 1.00 8.58 C

HETATM 8 C MOL A 1 -7.487 -3.538 1.512 1.00 7.76 C

HETATM 9 C MOL A 1 -7.423 -3.004 -2.220 1.00 8.36 C

HETATM 10 C MOL A 1 -7.386 4.253 -0.687 1.00 8.99 C

HETATM 11 C MOL A 1 -6.682 3.147 2.106 1.00 7.89 C

HETATM 12 C MOL A 1 -6.380 4.903 -1.377 1.00 7.78 C

HETATM 13 C MOL A 1 -5.329 -0.894 1.519 1.00 7.28 C

HETATM 14 C MOL A 1 -4.782 -1.015 -0.709 1.00 7.64 C

HETATM 15 C MOL A 1 -4.575 3.427 1.723 1.00 7.36 C

HETATM 16 C MOL A 1 -4.381 2.332 -3.860 1.00 5.94 C

HETATM 17 C MOL A 1 -3.954 -1.125 -0.783 1.00 6.34 C

HETATM 18 C MOL A 1 -3.776 0.462 -2.722 1.00 4.16 C

HETATM 19 C MOL A 1 -2.967 2.118 2.743 1.00 11.67 C

HETATM 20 C MOL A 1 -2.300 4.567 -1.164 1.00 7.07 C

HETATM 21 C MOL A 1 -1.707 3.193 -0.234 1.00 5.67 C

HETATM 22 C MOL A 1 -1.096 -3.507 -1.418 1.00 5.84 C

HETATM 23 C MOL A 1 -0.493 -0.112 -1.009 1.00-15.16 C

HETATM 24 C MOL A 1 -0.239 -5.507 -0.293 1.00 8.82 C

HETATM 25 C MOL A 1 0.014 -5.782 -0.645 1.00 8.82 C

HETATM 26 C MOL A 1 0.223 0.274 4.558 1.00 8.43 C

HETATM 27 C MOL A 1 0.890 2.765 1.678 1.00 8.03 C

HETATM 28 C MOL A 1 1.002 -3.274 -2.728 1.00 8.29 C

HETATM 29 C MOL A 1 2.291 -3.535 2.736 1.00 6.82 C

HETATM 30 C MOL A 1 2.298 -0.840 2.339 1.00 10.74 C

HETATM 31 C MOL A 1 2.490 -5.942 2.517 1.00 7.32 C

HETATM 32 C MOL A 1 2.442 3.208 -1.407 1.00 8.23 C

HETATM 33 C MOL A 1 2.889 -4.115 -2.797 1.00 6.93 C

HETATM 34 C MOL A 1 3.303 2.722 -2.847 1.00 8.57 C

HETATM 35 C MOL A 1 3.837 -0.962 0.244 1.00 7.92 C

HETATM 36 C MOL A 1 3.939 -7.403 -0.984 1.00 7.98 C

HETATM 37 C MOL A 1 4.032 6.714 -0.064 1.00 8.84 C

HETATM 38 C MOL A 1 4.428 -4.097 2.647 1.00 6.69 C

HETATM 39 C MOL A 1 4.850 4.928 -3.641 1.00 8.12 C

HETATM 40 C MOL A 1 5.111 -3.083 -2.877 1.00 7.21 C

HETATM 41 C MOL A 1 5.196 -0.478 -2.058 1.00 8.70 C

HETATM 42 C MOL A 1 5.170 6.688 1.201 1.00 8.93 C

HETATM 43 C MOL A 1 5.527 -6.284 -0.717 1.00 6.95 C

HETATM 44 C MOL A 1 6.789 -2.840 2.538 1.00 6.43 C

HETATM 45 C MOL A 1 6.955 2.016 -4.173 1.00 8.68 C

HETATM 46 C MOL A 1 7.103 -1.809 -3.008 1.00 6.65 C

HETATM 47 C MOL A 1 7.601 0.346 -3.150 1.00 7.53 C

HETATM 48 C MOL A 1 7.681 -5.119 -0.768 1.00 6.70 C

HETATM 49 C MOL A 1 8.347 4.933 3.260 1.00 8.86 C

HETATM 50 C MOL A 1 8.608 -0.169 2.471 1.00 9.02 C

HETATM 51 C MOL A 1 9.374 -1.947 2.191 1.00 7.70 C

HETATM 52 C MOL A 1 9.455 3.631 3.542 1.00 8.82 C

HETATM 53 C MOL A 1 9.578 -4.343 -1.178 1.00 7.66 C

HETATM 54 C MOL A 1 10.269 0.571 -0.399 1.00 8.27 C

HETATM 55 C MOL A 1 10.492 -0.310 -1.108 1.00 8.19 C

HETATM 56 C MOL A 1 10.973 1.749 0.249 1.00 8.71 C

HETATM 1 O MOL A 1 -10.471 -4.467 -0.766 1.00 -0.17 O

HETATM 2 O MOL A 1 -10.117 -0.142 1.824 1.00-20.32 O

HETATM 3 O MOL A 1 -9.714 0.671 -1.785 1.00-20.31 O

HETATM 4 O MOL A 1 -9.241 4.782 1.515 1.00 0.48 O

HETATM 5 O MOL A 1 -9.139 4.821 1.398 1.00 0.48 O

HETATM 6 O MOL A 1 -9.043 4.862 1.237 1.00 0.48 O

HETATM 7 O MOL A 1 -9.011 4.923 0.959 1.00 0.48 O

HETATM 8 O MOL A 1 -5.697 -2.917 -0.085 1.00 -1.39 O

HETATM 9 O MOL A 1 -3.999 4.545 -3.124 1.00 -1.81 O

HETATM 10 O MOL A 1 -3.831 4.462 -3.151 1.00 -1.82 O

HETATM 11 O MOL A 1 -2.732 2.891 -2.604 1.00 -1.95 O

HETATM 12 O MOL A 1 -2.602 -3.075 1.281 1.00-16.33 O

HETATM 13 O MOL A 1 -1.790 -1.757 2.313 1.00-17.57 O

HETATM 14 O MOL A 1 -1.137 -0.521 -2.059 1.00-15.93 O

HETATM 15 O MOL A 1 -1.067 -2.285 2.238 1.00-17.77 O

HETATM 16 O MOL A 1 -0.410 -4.258 -1.649 1.00 3.09 O

HETATM 17 O MOL A 1 -0.022 2.334 3.668 1.00 1.17 O

HETATM 18 O MOL A 1 0.294 -0.045 -0.630 1.00-17.24 O

HETATM 19 O MOL A 1 1.906 -7.490 0.646 1.00 -1.00 O

HETATM 20 O MOL A 1 3.361 -2.377 1.645 1.00 2.26 O

HETATM 21 O MOL A 1 3.396 5.902 -2.200 1.00 0.39 O

HETATM 22 O MOL A 1 3.592 6.053 -2.241 1.00 0.39 O

HETATM 23 O MOL A 1 4.052 -1.805 -1.623 1.00 1.21 O

HETATM 24 O MOL A 1 4.583 1.069 -3.555 1.00 0.74 O

HETATM 25 O MOL A 1 5.201 -4.669 -1.745 1.00 3.06 O

HETATM 26 O MOL A 1 5.536 2.801 1.607 1.00-19.75 O

HETATM 27 O MOL A 1 5.839 -5.207 1.276 1.00 -0.71 O

HETATM 28 O MOL A 1 7.041 -4.588 1.294 1.00 -0.86 O

HETATM 29 O MOL A 1 7.265 -3.568 -1.855 1.00 2.72 O

HETATM 30 O MOL A 1 7.303 -4.504 1.311 1.00 -0.84 O

HETATM 31 O MOL A 1 7.844 -1.952 1.858 1.00 4.21 O

HETATM 32 O MOL A 1 7.903 4.622 -0.618 1.00-19.97 O

HETATM 33 O MOL A 1 9.106 -3.793 0.897 1.00 -0.82 O

HETATM 34 O MOL A 1 10.525 1.614 2.628 1.00 0.56 O

HETATM 35 O MOL A 1 10.790 -2.659 0.263 1.00 -1.07 O

END

**Table SS 13**. Benzobisbenzothiophene with WS-biochar of local minima and maxima on the Electrostatic potentials (ESP) surface.

REMARK Unit of B-factor field (i.e. ESP) is eV

REMARK Carbon: Surface maximum Oxygen: surface minimum

HETATM 1 C MOL A 1 -13.752 -3.006 -1.396 1.00 -0.70 C

HETATM 2 C MOL A 1 -11.181 -5.607 -0.819 1.00 -0.47 C

HETATM 3 C MOL A 1 -10.724 -3.479 -3.619 1.00 -0.49 C

HETATM 4 C MOL A 1 -9.732 -5.114 -2.465 1.00 -0.43 C

HETATM 5 C MOL A 1 -8.787 0.201 1.800 1.00 -1.13 C

HETATM 6 C MOL A 1 -7.905 7.575 0.290 1.00 -0.70 C

HETATM 7 C MOL A 1 -7.365 -1.571 -1.669 1.00 -1.78 C

HETATM 8 C MOL A 1 -6.705 4.446 1.554 1.00 -0.85 C

HETATM 9 C MOL A 1 -6.045 -2.841 1.924 1.00 -1.45 C

HETATM 10 C MOL A 1 -5.861 -5.528 -2.407 1.00 -0.48 C

HETATM 11 C MOL A 1 -5.789 10.014 -1.370 1.00 -0.69 C

HETATM 12 C MOL A 1 -5.702 -0.773 -0.829 1.00 -1.51 C

HETATM 13 C MOL A 1 -4.462 5.963 -1.733 1.00 -2.10 C

HETATM 14 C MOL A 1 -3.809 -3.358 1.831 1.00 -1.80 C

HETATM 15 C MOL A 1 -3.769 7.358 1.355 1.00 -2.07 C

HETATM 16 C MOL A 1 -3.652 0.632 3.131 1.00 -0.93 C

HETATM 17 C MOL A 1 -3.266 -1.175 -0.775 1.00 -1.82 C

HETATM 18 C MOL A 1 -2.819 4.657 -1.584 1.00 -1.97 C

HETATM 19 C MOL A 1 -2.775 -6.731 -3.288 1.00 -0.78 C

HETATM 20 C MOL A 1 -2.459 -5.143 0.601 1.00 -1.84 C

HETATM 21 C MOL A 1 -2.361 0.749 -0.423 1.00 -0.30 C

HETATM 22 C MOL A 1 -2.104 -2.725 -1.860 1.00 -2.01 C

HETATM 23 C MOL A 1 -2.102 6.167 1.593 1.00 -1.95 C

HETATM 24 C MOL A 1 -1.904 9.303 -1.939 1.00 -0.75 C

HETATM 25 C MOL A 1 -1.330 -3.556 2.063 1.00 -1.77 C

HETATM 26 C MOL A 1 -0.919 3.588 1.903 1.00 -2.07 C

HETATM 27 C MOL A 1 -0.696 4.733 -2.064 1.00 -2.32 C

HETATM 28 C MOL A 1 -0.312 -0.455 5.300 1.00 -1.01 C

HETATM 29 C MOL A 1 0.081 -3.116 -1.738 1.00 -1.99 C

HETATM 30 C MOL A 1 0.034 6.142 1.030 1.00 -2.29 C

HETATM 31 C MOL A 1 0.857 2.042 -0.390 1.00 -2.04 C

HETATM 32 C MOL A 1 0.859 2.442 4.059 1.00 -1.23 C

HETATM 33 C MOL A 1 0.910 -7.092 0.918 1.00 -1.06 C

HETATM 34 C MOL A 1 1.196 2.636 1.402 1.00 -1.81 C

HETATM 35 C MOL A 1 1.198 -3.556 2.347 1.00 -1.78 C

HETATM 36 C MOL A 1 1.255 -1.571 -0.461 1.00 -2.12 C

HETATM 37 C MOL A 1 1.355 -3.471 -1.851 1.00 -2.02 C

HETATM 38 C MOL A 1 1.519 4.701 -2.653 1.00 -2.30 C

HETATM 39 C MOL A 1 2.261 6.165 0.558 1.00 -2.26 C

HETATM 40 C MOL A 1 2.542 2.197 4.132 1.00 -1.15 C

HETATM 41 C MOL A 1 2.616 -0.128 0.433 1.00 -2.30 C

HETATM 42 C MOL A 1 2.694 -7.218 -3.003 1.00 -0.85 C

HETATM 43 C MOL A 1 2.782 -1.807 3.463 1.00 -1.93 C

HETATM 44 C MOL A 1 3.321 -1.651 -0.618 1.00 -2.26 C

HETATM 45 C MOL A 1 3.778 -3.669 2.155 1.00 -1.85 C

HETATM 46 C MOL A 1 4.114 0.095 0.254 1.00 -2.36 C

HETATM 47 C MOL A 1 4.211 -3.074 -2.020 1.00 -2.18 C

HETATM 48 C MOL A 1 4.413 7.047 -2.336 1.00 -1.47 C

HETATM 49 C MOL A 1 5.119 -1.730 3.178 1.00 -1.82 C

HETATM 50 C MOL A 1 5.749 6.796 -2.574 1.00 -1.44 C

HETATM 51 C MOL A 1 7.002 -6.382 -3.495 1.00 0.84 C

HETATM 52 C MOL A 1 8.566 0.092 3.127 1.00 -1.99 C

HETATM 53 C MOL A 1 9.447 -3.077 -0.827 1.00 -1.69 C

HETATM 1 O MOL A 1 -12.211 -0.309 0.832 1.00 -2.80 O

HETATM 2 O MOL A 1 -11.435 0.005 1.121 1.00 -2.80 O

HETATM 3 O MOL A 1 -8.484 -3.243 1.568 1.00 -1.81 O

HETATM 4 O MOL A 1 -7.982 -0.824 -1.463 1.00 -1.86 O

HETATM 5 O MOL A 1 -7.661 -4.392 0.760 1.00 -1.81 O

HETATM 6 O MOL A 1 -7.212 -2.052 -2.239 1.00 -1.86 O

HETATM 7 O MOL A 1 -6.289 0.535 1.755 1.00 -2.29 O

HETATM 8 O MOL A 1 -4.911 5.580 -1.609 1.00 -2.13 O

HETATM 9 O MOL A 1 -4.562 6.406 -2.058 1.00 -2.13 O

HETATM 10 O MOL A 1 -4.202 7.255 1.638 1.00 -2.10 O

HETATM 11 O MOL A 1 -3.772 7.911 1.236 1.00 -2.10 O

HETATM 12 O MOL A 1 -3.491 -2.603 2.780 1.00 -1.96 O

HETATM 13 O MOL A 1 -3.257 3.032 -1.226 1.00 -2.27 O

HETATM 14 O MOL A 1 -3.166 -4.512 1.328 1.00 -1.92 O

HETATM 15 O MOL A 1 -3.028 -5.699 0.256 1.00 -1.94 O

HETATM 16 O MOL A 1 -2.506 -3.126 -2.574 1.00 -2.11 O

HETATM 17 O MOL A 1 -2.131 4.388 2.825 1.00 -2.33 O

HETATM 18 O MOL A 1 -1.250 2.673 2.226 1.00 -2.64 O

HETATM 19 O MOL A 1 -1.088 -2.759 2.981 1.00 -1.95 O

HETATM 20 O MOL A 1 -1.047 -2.365 -1.652 1.00 -2.09 O

HETATM 21 O MOL A 1 0.303 3.634 -2.052 1.00 -2.45 O

HETATM 22 O MOL A 1 0.478 -4.508 -3.082 1.00 -2.60 O

HETATM 23 O MOL A 1 0.513 0.889 0.283 1.00 -2.84 O

HETATM 24 O MOL A 1 0.855 5.373 1.433 1.00 -2.39 O

HETATM 25 O MOL A 1 2.161 -2.507 3.322 1.00 -1.98 O

HETATM 26 O MOL A 1 2.202 5.645 -3.721 1.00 -2.54 O

HETATM 27 O MOL A 1 2.548 -3.784 -2.656 1.00 -2.35 O

HETATM 28 O MOL A 1 3.103 -1.084 4.108 1.00 -2.03 O

HETATM 29 O MOL A 1 3.173 7.477 0.203 1.00 -2.51 O

HETATM 30 O MOL A 1 3.322 0.644 0.499 1.00 -2.38 O

HETATM 31 O MOL A 1 3.668 -2.603 3.252 1.00 -1.99 O

HETATM 32 O MOL A 1 4.605 -3.397 -2.733 1.00 -2.31 O

HETATM 33 O MOL A 1 5.433 -6.062 0.045 1.00 -2.03 O

HETATM 34 O MOL A 1 6.280 1.680 1.232 1.00 -4.41 O

HETATM 35 O MOL A 1 7.782 -3.076 1.711 1.00 -2.32 O

HETATM 36 O MOL A 1 8.083 -3.340 -2.660 1.00 -2.68 O

HETATM 37 O MOL A 1 8.285 2.397 -1.673 1.00 -4.87 O

HETATM 38 O MOL A 1 8.903 -1.714 2.185 1.00 -2.35 O

END

**Table SS 14**. Trimethylbenzene with WS-biochar of local minima and maxima on the Electrostatic potentials (ESP) surface.

REMARK Unit of B-factor field (i.e. ESP) is eV

REMARK Carbon: Surface maximum Oxygen: surface minimum

HETATM 1 C MOL A 1 -13.967 1.782 0.152 1.00 -1.57 C

HETATM 2 C MOL A 1 -13.246 -1.779 -0.088 1.00 -1.61 C

HETATM 3 C MOL A 1 -12.771 0.526 -3.025 1.00 -1.73 C

HETATM 4 C MOL A 1 -12.237 1.878 2.695 1.00 -1.63 C

HETATM 5 C MOL A 1 -11.807 3.690 0.462 1.00 -1.86 C

HETATM 6 C MOL A 1 -11.717 -1.667 2.250 1.00 -1.66 C

HETATM 7 C MOL A 1 -11.109 2.512 -2.790 1.00 -2.04 C

HETATM 8 C MOL A 1 -9.422 5.516 0.383 1.00 -1.87 C

HETATM 9 C MOL A 1 -9.000 0.748 2.993 1.00 -1.93 C

HETATM 10 C MOL A 1 -8.997 4.404 -2.994 1.00 -2.05 C

HETATM 11 C MOL A 1 -8.585 2.497 2.208 1.00 -2.09 C

HETATM 12 C MOL A 1 -7.317 -3.210 2.216 1.00 -1.65 C

HETATM 13 C MOL A 1 -7.315 6.847 1.006 1.00 -1.61 C

HETATM 14 C MOL A 1 -7.048 6.627 -2.687 1.00 -1.71 C

HETATM 15 C MOL A 1 -6.771 -4.278 -2.743 1.00 -1.96 C

HETATM 16 C MOL A 1 -6.184 3.786 1.737 1.00 -2.07 C

HETATM 17 C MOL A 1 -6.032 4.502 -3.670 1.00 -2.15 C

HETATM 18 C MOL A 1 -4.466 -2.664 6.159 1.00 0.85 C

HETATM 19 C MOL A 1 -4.098 6.190 -0.371 1.00 -1.74 C

HETATM 20 C MOL A 1 -3.344 3.690 -4.268 1.00 -2.14 C

HETATM 21 C MOL A 1 -3.105 3.115 3.281 1.00 -1.49 C

HETATM 22 C MOL A 1 -3.070 -5.005 -1.823 1.00 -1.77 C

HETATM 23 C MOL A 1 -2.295 -1.517 2.296 1.00 -2.12 C

HETATM 24 C MOL A 1 -2.273 0.554 4.114 1.00 -1.52 C

HETATM 25 C MOL A 1 -2.012 -0.845 -4.632 1.00 -2.04 C

HETATM 26 C MOL A 1 -1.518 -1.591 0.462 1.00 -2.32 C

HETATM 27 C MOL A 1 -1.440 -5.123 0.224 1.00 -1.79 C

HETATM 28 C MOL A 1 -1.434 -2.815 -5.723 1.00 -1.10 C

HETATM 29 C MOL A 1 -1.353 2.813 -5.163 1.00 -1.91 C

HETATM 30 C MOL A 1 -1.359 6.665 2.510 1.00 -1.22 C

HETATM 31 C MOL A 1 -1.403 6.804 -1.328 1.00 -1.37 C

HETATM 32 C MOL A 1 -0.724 8.045 2.180 1.00 -1.11 C

HETATM 33 C MOL A 1 -0.663 -4.831 -2.163 1.00 -1.88 C

HETATM 34 C MOL A 1 -0.501 4.073 4.821 1.00 -1.32 C

HETATM 35 C MOL A 1 -0.004 -2.893 6.027 1.00 -0.85 C

HETATM 36 C MOL A 1 0.267 1.823 5.463 1.00 -1.35 C

HETATM 37 C MOL A 1 0.402 -2.328 -6.100 1.00 -1.19 C

HETATM 38 C MOL A 1 0.387 -1.267 -0.031 1.00 -2.10 C

HETATM 39 C MOL A 1 0.668 1.431 -2.511 1.00 -2.24 C

HETATM 40 C MOL A 1 1.028 -0.741 1.903 1.00 -1.97 C

HETATM 41 C MOL A 1 1.183 -4.645 -0.330 1.00 -1.71 C

HETATM 42 C MOL A 1 1.335 -0.108 0.069 1.00 -1.97 C

HETATM 43 C MOL A 1 1.578 -0.965 1.746 1.00 -1.99 C

HETATM 44 C MOL A 1 1.622 8.894 -0.728 1.00 -1.06 C

HETATM 45 C MOL A 1 2.056 -5.518 3.321 1.00 -1.02 C

HETATM 46 C MOL A 1 2.144 -4.785 -4.763 1.00 -1.00 C

HETATM 47 C MOL A 1 3.310 0.830 -2.324 1.00 -0.30 C

HETATM 48 C MOL A 1 3.464 0.872 0.105 1.00 -1.77 C

HETATM 49 C MOL A 1 3.545 -3.874 -0.415 1.00 -1.70 C

HETATM 50 C MOL A 1 3.641 8.055 -0.568 1.00 -1.10 C

HETATM 51 C MOL A 1 4.662 0.181 -0.732 1.00 -1.79 C

HETATM 52 C MOL A 1 4.634 2.341 3.995 1.00 -1.37 C

HETATM 53 C MOL A 1 4.832 -3.415 1.574 1.00 -1.77 C

HETATM 54 C MOL A 1 4.991 -1.623 -4.615 1.00 -0.87 C

HETATM 55 C MOL A 1 5.133 -1.271 5.185 1.00 -0.78 C

HETATM 56 C MOL A 1 5.648 7.371 -0.474 1.00 -1.05 C

HETATM 57 C MOL A 1 5.888 -3.028 -0.711 1.00 -1.73 C

HETATM 58 C MOL A 1 6.261 3.680 -1.153 1.00 -1.26 C

HETATM 59 C MOL A 1 6.425 2.979 1.259 1.00 -1.33 C

HETATM 60 C MOL A 1 6.635 5.103 2.361 1.00 -1.09 C

HETATM 61 C MOL A 1 6.817 0.956 -1.381 1.00 -1.44 C

HETATM 62 C MOL A 1 7.947 -0.580 3.345 1.00 -0.45 C

HETATM 63 C MOL A 1 7.986 -2.294 -1.450 1.00 -1.38 C

HETATM 64 C MOL A 1 8.469 1.524 -0.416 1.00 -1.72 C

HETATM 65 C MOL A 1 9.843 0.206 -4.049 1.00 -1.08 C

HETATM 66 C MOL A 1 11.579 0.594 2.605 1.00 -0.39 C

HETATM 67 C MOL A 1 12.053 2.634 1.960 1.00 -0.47 C

HETATM 68 C MOL A 1 13.174 -0.663 1.808 1.00 -0.43 C

HETATM 69 C MOL A 1 15.101 1.885 -0.157 1.00 -0.67 C

HETATM 1 O MOL A 1 -12.760 0.069 1.336 1.00 -2.08 O

HETATM 2 O MOL A 1 -12.184 2.341 0.780 1.00 -2.04 O

HETATM 3 O MOL A 1 -11.993 2.580 -1.441 1.00 -2.26 O

HETATM 4 O MOL A 1 -10.260 3.939 -1.447 1.00 -2.39 O

HETATM 5 O MOL A 1 -10.006 2.673 1.501 1.00 -2.34 O

HETATM 6 O MOL A 1 -9.688 3.378 1.178 1.00 -2.34 O

HETATM 7 O MOL A 1 -8.694 5.404 -1.713 1.00 -2.26 O

HETATM 8 O MOL A 1 -8.125 -0.285 0.275 1.00 -4.05 O

HETATM 9 O MOL A 1 -8.009 3.726 1.293 1.00 -2.32 O

HETATM 10 O MOL A 1 -6.915 0.400 -2.749 1.00 -4.66 O

HETATM 11 O MOL A 1 -6.774 0.356 -2.745 1.00 -4.66 O

HETATM 12 O MOL A 1 -6.507 -3.597 3.652 1.00 -2.55 O

HETATM 13 O MOL A 1 -6.139 0.801 -0.284 1.00 -4.36 O

HETATM 14 O MOL A 1 -5.963 -1.735 3.382 1.00 -2.64 O

HETATM 15 O MOL A 1 -5.555 -5.026 0.551 1.00 -2.28 O

HETATM 16 O MOL A 1 -4.637 3.286 0.741 1.00 -2.47 O

HETATM 17 O MOL A 1 -4.375 -1.115 -2.676 1.00 -4.49 O

HETATM 18 O MOL A 1 -4.350 4.271 -2.633 1.00 -2.49 O

HETATM 19 O MOL A 1 -2.973 3.998 -2.398 1.00 -2.43 O

HETATM 20 O MOL A 1 -2.777 -5.106 3.646 1.00 -2.00 O

HETATM 21 O MOL A 1 -2.690 -1.206 3.021 1.00 -2.24 O

HETATM 22 O MOL A 1 -1.518 1.851 4.394 1.00 -1.70 O

HETATM 23 O MOL A 1 -1.428 -5.345 -1.355 1.00 -1.95 O

HETATM 24 O MOL A 1 -1.105 -4.941 -3.097 1.00 -1.99 O

HETATM 25 O MOL A 1 -0.848 -1.118 2.640 1.00 -2.29 O

HETATM 26 O MOL A 1 -0.042 2.467 -3.205 1.00 -2.39 O

HETATM 27 O MOL A 1 0.093 -5.010 -1.663 1.00 -1.93 O

HETATM 28 O MOL A 1 0.466 -0.516 -2.552 1.00 -2.98 O

HETATM 29 O MOL A 1 0.851 0.270 -4.490 1.00 -3.21 O

HETATM 30 O MOL A 1 1.742 -0.836 4.111 1.00 -2.60 O

HETATM 31 O MOL A 1 2.126 -4.656 -0.016 1.00 -1.79 O

HETATM 32 O MOL A 1 2.154 4.416 -0.868 1.00 -2.60 O

HETATM 33 O MOL A 1 2.377 1.144 2.790 1.00 -2.94 O

HETATM 34 O MOL A 1 2.627 5.767 2.469 1.00 -2.46 O

HETATM 35 O MOL A 1 3.165 -4.202 -1.539 1.00 -1.89 O

HETATM 36 O MOL A 1 3.483 0.165 2.430 1.00 -2.25 O

HETATM 37 O MOL A 1 5.130 0.751 1.001 1.00 -2.05 O

HETATM 38 O MOL A 1 5.467 -3.410 -1.857 1.00 -1.89 O

HETATM 39 O MOL A 1 5.469 -3.454 0.543 1.00 -1.85 O

HETATM 40 O MOL A 1 5.532 -3.317 2.204 1.00 -1.87 O

HETATM 41 O MOL A 1 6.857 4.087 0.523 1.00 -1.47 O

HETATM 42 O MOL A 1 7.438 -0.206 -4.004 1.00 -2.22 O

HETATM 43 O MOL A 1 8.471 1.684 0.457 1.00 -1.81 O

HETATM 44 O MOL A 1 9.041 1.951 -1.123 1.00 -1.80 O

HETATM 45 O MOL A 1 9.755 -1.944 0.305 1.00 -1.75 O

HETATM 46 O MOL A 1 10.377 -1.724 -1.209 1.00 -1.75 O

HETATM 47 O MOL A 1 13.260 1.393 -3.432 1.00 -2.75 O

END

**Table SS 15**. Thiophene with WS-biochar of local minima and maxima on the Electrostatic potentials (ESP) surface.

REMARK Unit of B-factor field (i.e. ESP) is eV

REMARK Carbon: Surface maximum Oxygen: surface minimum

HETATM 1 C MOL A 1 -13.430 -4.669 -2.699 1.00 -0.67 C

HETATM 2 C MOL A 1 -13.071 7.559 0.182 1.00 -0.59 C

HETATM 3 C MOL A 1 -10.969 4.281 0.636 1.00 -0.73 C

HETATM 4 C MOL A 1 -10.955 7.341 3.223 1.00 -0.70 C

HETATM 5 C MOL A 1 -10.627 -2.656 -4.119 1.00 -0.46 C

HETATM 6 C MOL A 1 -10.491 -6.101 -4.523 1.00 -0.42 C

HETATM 7 C MOL A 1 -10.148 6.935 -2.356 1.00 -0.67 C

HETATM 8 C MOL A 1 -9.933 9.846 0.401 1.00 -0.68 C

HETATM 9 C MOL A 1 -9.348 -4.335 -4.827 1.00 -0.38 C

HETATM 10 C MOL A 1 -8.925 6.097 -2.135 1.00 -0.80 C

HETATM 11 C MOL A 1 -8.733 0.598 3.684 1.00 -0.99 C

HETATM 12 C MOL A 1 -8.733 -1.728 0.802 1.00 -1.27 C

HETATM 13 C MOL A 1 -8.662 4.528 1.671 1.00 -0.84 C

HETATM 14 C MOL A 1 -8.574 -5.122 1.949 1.00 -1.07 C

HETATM 15 C MOL A 1 -7.954 9.521 -0.871 1.00 -0.76 C

HETATM 16 C MOL A 1 -7.548 1.615 0.800 1.00 -1.13 C

HETATM 17 C MOL A 1 -7.484 8.346 2.828 1.00 -0.83 C

HETATM 18 C MOL A 1 -7.429 4.259 -1.487 1.00 -0.95 C

HETATM 19 C MOL A 1 -7.214 1.989 3.813 1.00 -1.00 C

HETATM 20 C MOL A 1 -7.225 3.316 1.561 1.00 -0.88 C

HETATM 21 C MOL A 1 -6.946 -1.688 -0.562 1.00 -1.40 C

HETATM 22 C MOL A 1 -6.567 5.912 -3.314 1.00 -0.92 C

HETATM 23 C MOL A 1 -6.270 -2.360 4.300 1.00 -1.17 C

HETATM 24 C MOL A 1 -6.080 9.464 -2.043 1.00 -0.80 C

HETATM 25 C MOL A 1 -5.856 8.686 -4.267 1.00 -0.77 C

HETATM 26 C MOL A 1 -5.732 8.559 1.406 1.00 -0.97 C

HETATM 27 C MOL A 1 -5.569 -6.428 -0.472 1.00 -1.37 C

HETATM 28 C MOL A 1 -5.474 -4.108 -4.995 1.00 -0.44 C

HETATM 29 C MOL A 1 -4.857 -0.934 4.425 1.00 -1.27 C

HETATM 30 C MOL A 1 -4.427 5.433 -4.347 1.00 -1.05 C

HETATM 31 C MOL A 1 -4.033 0.027 -0.835 1.00 -1.65 C

HETATM 32 C MOL A 1 -3.487 -5.294 3.276 1.00 -0.84 C

HETATM 33 C MOL A 1 -3.479 1.696 0.029 1.00 -2.19 C

HETATM 34 C MOL A 1 -3.457 -2.363 2.030 1.00 -1.30 C

HETATM 35 C MOL A 1 -3.256 -6.295 -0.846 1.00 -1.73 C

HETATM 36 C MOL A 1 -3.238 -2.895 -0.374 1.00 -1.87 C

HETATM 37 C MOL A 1 -3.262 3.665 2.863 1.00 -2.18 C

HETATM 38 C MOL A 1 -3.187 9.208 -0.630 1.00 -0.96 C

HETATM 39 C MOL A 1 -2.798 10.297 -2.572 1.00 -0.80 C

HETATM 40 C MOL A 1 -2.487 -2.287 1.425 1.00 -0.69 C

HETATM 41 C MOL A 1 -2.462 8.182 -5.889 1.00 -0.81 C

HETATM 42 C MOL A 1 -2.318 -3.474 -6.297 1.00 -0.77 C

HETATM 43 C MOL A 1 -2.052 -2.584 -2.124 1.00 -2.03 C

HETATM 44 C MOL A 1 -1.842 -5.939 -2.944 1.00 -1.78 C

HETATM 45 C MOL A 1 -1.827 0.374 0.682 1.00 -2.18 C

HETATM 46 C MOL A 1 -1.691 2.393 3.701 1.00 -2.16 C

HETATM 47 C MOL A 1 -1.253 2.358 -0.509 1.00 -2.16 C

HETATM 48 C MOL A 1 -1.105 4.237 2.315 1.00 -2.11 C

HETATM 49 C MOL A 1 -0.717 -6.255 -0.786 1.00 -1.70 C

HETATM 50 C MOL A 1 -0.526 7.035 -1.658 1.00 -0.89 C

HETATM 51 C MOL A 1 -0.314 -0.623 4.070 1.00 -1.72 C

HETATM 52 C MOL A 1 0.234 -7.368 3.597 1.00 -0.97 C

HETATM 53 C MOL A 1 0.251 -2.582 -2.282 1.00 -1.99 C

HETATM 54 C MOL A 1 0.297 0.882 0.312 1.00 -2.53 C

HETATM 55 C MOL A 1 0.856 -4.665 5.529 1.00 -1.13 C

HETATM 56 C MOL A 1 1.013 2.633 -0.891 1.00 -2.47 C

HETATM 57 C MOL A 1 1.128 -1.093 4.409 1.00 -1.68 C

HETATM 58 C MOL A 1 1.348 -2.479 -2.470 1.00 -2.03 C

HETATM 59 C MOL A 1 1.356 -2.760 -0.230 1.00 -2.12 C

HETATM 60 C MOL A 1 1.359 0.340 5.797 1.00 -1.83 C

HETATM 61 C MOL A 1 1.410 4.505 1.956 1.00 -2.40 C

HETATM 62 C MOL A 1 1.350 6.529 -3.325 1.00 -1.15 C

HETATM 63 C MOL A 1 1.758 -6.156 -0.537 1.00 -1.70 C

HETATM 64 C MOL A 1 1.824 -6.689 -4.238 1.00 -1.04 C

HETATM 65 C MOL A 1 1.838 8.288 -0.541 1.00 -1.17 C

HETATM 66 C MOL A 1 2.627 -4.504 5.480 1.00 -1.02 C

HETATM 67 C MOL A 1 2.697 -2.552 1.502 1.00 -2.26 C

HETATM 68 C MOL A 1 2.641 -1.868 1.925 1.00 -2.24 C

HETATM 69 C MOL A 1 3.017 -2.997 -6.257 1.00 -0.90 C

HETATM 70 C MOL A 1 3.257 -6.015 1.677 1.00 -1.85 C

HETATM 71 C MOL A 1 3.332 -2.357 -0.147 1.00 -2.19 C

HETATM 72 C MOL A 1 3.553 -0.384 -0.419 1.00 -2.19 C

HETATM 73 C MOL A 1 3.560 3.029 4.127 1.00 -2.03 C

HETATM 74 C MOL A 1 3.641 -1.096 8.012 1.00 -1.49 C

HETATM 75 C MOL A 1 4.112 -2.066 1.512 1.00 -2.18 C

HETATM 76 C MOL A 1 4.207 -1.645 -1.894 1.00 -2.19 C

HETATM 77 C MOL A 1 4.399 -5.618 -0.547 1.00 -1.77 C

HETATM 78 C MOL A 1 4.532 1.699 6.206 1.00 -1.92 C

HETATM 79 C MOL A 1 4.869 7.587 -2.611 1.00 -1.18 C

HETATM 80 C MOL A 1 5.550 -5.287 1.841 1.00 -1.71 C

HETATM 81 C MOL A 1 5.743 -2.493 5.991 1.00 -1.92 C

HETATM 82 C MOL A 1 5.889 1.218 -2.033 1.00 -2.21 C

HETATM 83 C MOL A 1 7.051 -1.100 -5.409 1.00 0.67 C

HETATM 84 C MOL A 1 7.719 6.000 -0.213 1.00 -1.83 C

HETATM 85 C MOL A 1 8.050 -2.760 4.012 1.00 -2.11 C

HETATM 86 C MOL A 1 8.029 6.521 -2.924 1.00 -1.49 C

HETATM 87 C MOL A 1 8.257 2.637 -4.590 1.00 -1.65 C

HETATM 88 C MOL A 1 9.206 -2.245 -1.222 1.00 -2.27 C

HETATM 89 C MOL A 1 10.004 3.985 -4.834 1.00 -1.47 C

HETATM 90 C MOL A 1 10.097 -2.904 1.679 1.00 -1.93 C

HETATM 91 C MOL A 1 10.220 5.941 0.162 1.00 -1.72 C

HETATM 92 C MOL A 1 10.958 1.291 -3.085 1.00 -1.85 C

HETATM 93 C MOL A 1 11.017 7.370 -4.675 1.00 -1.14 C

HETATM 94 C MOL A 1 11.263 7.635 -0.950 1.00 -1.28 C

HETATM 95 C MOL A 1 12.223 3.373 -1.796 1.00 -1.71 C

HETATM 96 C MOL A 1 13.287 5.019 -2.990 1.00 -1.26 C

HETATM 1 O MOL A 1 -12.182 5.719 1.120 1.00 -1.00 O

HETATM 2 O MOL A 1 -11.959 -5.049 0.882 1.00 -2.75 O

HETATM 3 O MOL A 1 -11.352 8.148 -1.182 1.00 -0.97 O

HETATM 4 O MOL A 1 -9.685 5.202 -0.919 1.00 -1.07 O

HETATM 5 O MOL A 1 -9.697 8.883 2.364 1.00 -0.99 O

HETATM 6 O MOL A 1 -8.026 -2.773 -0.709 1.00 -1.76 O

HETATM 7 O MOL A 1 -7.942 -6.654 -1.106 1.00 -1.73 O

HETATM 8 O MOL A 1 -7.131 -2.573 -2.106 1.00 -1.79 O

HETATM 9 O MOL A 1 -7.075 -6.426 -2.536 1.00 -1.74 O

HETATM 10 O MOL A 1 -7.123 6.143 2.491 1.00 -1.18 O

HETATM 11 O MOL A 1 -7.098 7.541 -2.564 1.00 -1.13 O

HETATM 12 O MOL A 1 -6.837 -0.540 4.452 1.00 -1.43 O

HETATM 13 O MOL A 1 -6.183 -4.511 2.307 1.00 -2.22 O

HETATM 14 O MOL A 1 -4.605 9.897 -3.289 1.00 -1.09 O

HETATM 15 O MOL A 1 -4.117 1.859 -0.224 1.00 -2.23 O

HETATM 16 O MOL A 1 -4.206 9.227 -1.816 1.00 -1.07 O

HETATM 17 O MOL A 1 -3.826 3.500 3.172 1.00 -2.22 O

HETATM 18 O MOL A 1 -2.871 -6.668 0.243 1.00 -1.88 O

HETATM 19 O MOL A 1 -2.558 3.081 3.468 1.00 -2.26 O

HETATM 20 O MOL A 1 -2.474 -6.350 -2.059 1.00 -1.86 O

HETATM 21 O MOL A 1 -2.374 -6.004 -3.636 1.00 -1.88 O

HETATM 22 O MOL A 1 -2.395 -2.208 -2.860 1.00 -2.14 O

HETATM 23 O MOL A 1 -2.084 3.631 -1.618 1.00 -2.30 O

HETATM 24 O MOL A 1 -1.928 5.807 1.642 1.00 -2.25 O

HETATM 25 O MOL A 1 -1.735 1.059 5.026 1.00 -2.39 O

HETATM 26 O MOL A 1 -1.620 8.743 -3.821 1.00 -1.19 O

HETATM 27 O MOL A 1 -0.963 -2.444 -1.589 1.00 -2.13 O

HETATM 28 O MOL A 1 -0.709 -2.283 4.375 1.00 -3.04 O

HETATM 29 O MOL A 1 -0.502 -6.608 0.397 1.00 -1.88 O

HETATM 30 O MOL A 1 -0.240 -5.776 4.899 1.00 -1.27 O

HETATM 31 O MOL A 1 0.526 -2.211 2.529 1.00 -3.11 O

HETATM 32 O MOL A 1 0.627 -2.057 -4.122 1.00 -2.61 O

HETATM 33 O MOL A 1 0.872 2.281 3.859 1.00 -2.53 O

HETATM 34 O MOL A 1 0.933 -6.439 -1.030 1.00 -1.78 O

HETATM 35 O MOL A 1 1.129 -2.496 -1.088 1.00 -2.24 O

HETATM 36 O MOL A 1 1.095 5.093 1.808 1.00 -2.45 O

HETATM 37 O MOL A 1 1.174 -0.152 0.792 1.00 -2.71 O

HETATM 38 O MOL A 1 1.254 3.578 2.927 1.00 -2.48 O

HETATM 39 O MOL A 1 1.985 -0.933 6.041 1.00 -1.97 O

HETATM 40 O MOL A 1 2.618 -6.376 0.980 1.00 -1.91 O

HETATM 41 O MOL A 1 2.618 -1.686 -3.024 1.00 -2.41 O

HETATM 42 O MOL A 1 3.094 -2.091 -1.069 1.00 -2.29 O

HETATM 43 O MOL A 1 3.508 -6.142 2.651 1.00 -1.94 O

HETATM 44 O MOL A 1 3.559 2.553 -1.522 1.00 -2.72 O

HETATM 45 O MOL A 1 4.104 -6.127 0.794 1.00 -1.92 O

HETATM 46 O MOL A 1 4.364 -1.049 -2.704 1.00 -2.39 O

HETATM 47 O MOL A 1 4.978 4.059 1.796 1.00 -2.80 O

HETATM 48 O MOL A 1 5.778 -1.840 3.389 1.00 -3.12 O

HETATM 49 O MOL A 1 5.753 -0.498 1.421 1.00 -3.42 O

HETATM 50 O MOL A 1 6.176 -4.446 -3.726 1.00 -2.07 O

HETATM 51 O MOL A 1 6.740 1.922 -2.615 1.00 -2.35 O

HETATM 52 O MOL A 1 7.036 0.249 -0.481 1.00 -3.78 O

HETATM 53 O MOL A 1 7.362 5.778 -1.500 1.00 -1.91 O

HETATM 54 O MOL A 1 7.980 4.047 -3.441 1.00 -1.99 O

HETATM 55 O MOL A 1 8.271 -3.795 -1.093 1.00 -2.33 O

HETATM 56 O MOL A 1 8.340 1.846 1.917 1.00 -4.58 O

HETATM 57 O MOL A 1 8.494 -0.695 -2.372 1.00 -3.12 O

HETATM 58 O MOL A 1 8.630 5.780 -0.713 1.00 -1.95 O

HETATM 59 O MOL A 1 8.684 -3.361 2.821 1.00 -2.26 O

HETATM 60 O MOL A 1 10.091 0.260 -0.157 1.00 -4.31 O

HETATM 61 O MOL A 1 10.198 2.303 -3.722 1.00 -2.05 O

HETATM 62 O MOL A 1 10.647 2.645 -3.093 1.00 -2.05 O END

**Table SS 16**. Pyridinohopane with WS-biochar of local minima and maxima on the Electrostatic potentials (ESP) surface.

REMARK Unit of B-factor field (i.e. ESP) is eV

REMARK Carbon: Surface maximum Oxygen: surface minimum

HETATM 1 C MOL A 1 -18.297 -3.900 0.958 1.00 -0.58 C

HETATM 2 C MOL A 1 -16.866 -0.404 0.791 1.00 -0.33 C

HETATM 3 C MOL A 1 -15.612 -2.553 3.247 1.00 -0.35 C

HETATM 4 C MOL A 1 -15.434 -0.568 2.375 1.00 -0.27 C

HETATM 5 C MOL A 1 -13.034 -0.565 -1.330 1.00 -1.55 C

HETATM 6 C MOL A 1 -12.496 -4.378 -2.547 1.00 -0.96 C

HETATM 7 C MOL A 1 -12.024 1.376 2.494 1.00 -0.31 C

HETATM 8 C MOL A 1 -11.804 -2.709 1.149 1.00 -1.57 C

HETATM 9 C MOL A 1 -11.282 -0.565 -2.199 1.00 -1.26 C

HETATM 10 C MOL A 1 -10.044 -2.695 0.224 1.00 -1.27 C

HETATM 11 C MOL A 1 -9.637 3.557 3.645 1.00 -0.62 C

HETATM 12 C MOL A 1 -9.396 0.777 -1.973 1.00 -1.61 C

HETATM 13 C MOL A 1 -8.860 2.761 -0.426 1.00 -1.65 C

HETATM 14 C MOL A 1 -8.028 -1.359 0.341 1.00 -1.58 C

HETATM 15 C MOL A 1 -7.759 -2.721 -3.670 1.00 -0.73 C

HETATM 16 C MOL A 1 -7.536 0.387 1.706 1.00 -1.80 C

HETATM 17 C MOL A 1 -7.191 1.986 -2.072 1.00 -1.58 C

HETATM 18 C MOL A 1 -6.547 5.890 -0.401 1.00 -0.93 C

HETATM 19 C MOL A 1 -6.464 -2.777 -0.325 1.00 -0.06 C

HETATM 20 C MOL A 1 -5.661 1.590 1.690 1.00 -1.80 C

HETATM 21 C MOL A 1 -5.090 0.006 -5.690 1.00 -0.90 C

HETATM 22 C MOL A 1 -4.897 3.007 -2.265 1.00 -1.61 C

HETATM 23 C MOL A 1 -4.886 6.251 3.539 1.00 -0.74 C

HETATM 24 C MOL A 1 -4.611 2.372 1.853 1.00 -1.85 C

HETATM 25 C MOL A 1 -4.022 0.863 0.277 1.00 -1.94 C

HETATM 26 C MOL A 1 -2.984 -2.404 -4.797 1.00 -1.08 C

HETATM 27 C MOL A 1 -2.815 2.293 -3.494 1.00 -1.80 C

HETATM 28 C MOL A 1 -2.570 4.112 -1.970 1.00 -1.70 C

HETATM 29 C MOL A 1 -2.225 0.264 -0.718 1.00 -2.24 C

HETATM 30 C MOL A 1 -2.139 1.737 0.515 1.00 -2.12 C

HETATM 31 C MOL A 1 -1.773 3.182 2.056 1.00 -2.04 C

HETATM 32 C MOL A 1 -1.328 -1.475 -4.724 1.00 -0.99 C

HETATM 33 C MOL A 1 -1.204 -2.375 2.631 1.00 -2.00 C

HETATM 34 C MOL A 1 -0.769 0.705 -0.519 1.00 -2.38 C

HETATM 35 C MOL A 1 -0.669 3.004 -3.250 1.00 -1.68 C

HETATM 36 C MOL A 1 -0.510 7.139 4.046 1.00 0.92 C

HETATM 37 C MOL A 1 -0.118 -3.582 -0.560 1.00 -2.09 C

HETATM 38 C MOL A 1 0.073 0.657 4.711 1.00 -1.98 C

HETATM 39 C MOL A 1 0.604 -5.009 2.543 1.00 -1.90 C

HETATM 40 C MOL A 1 1.469 -3.185 5.789 1.00 -1.70 C

HETATM 41 C MOL A 1 1.639 -6.264 0.404 1.00 -1.76 C

HETATM 42 C MOL A 1 2.169 -6.150 3.878 1.00 -1.60 C

HETATM 43 C MOL A 1 2.263 0.575 7.011 1.00 -1.66 C

HETATM 44 C MOL A 1 2.198 2.206 5.073 1.00 -1.97 C

HETATM 45 C MOL A 1 2.954 5.461 1.014 1.00 -1.56 C

HETATM 46 C MOL A 1 3.149 2.938 -3.400 1.00 -1.81 C

HETATM 47 C MOL A 1 3.300 -2.777 6.739 1.00 -1.68 C

HETATM 48 C MOL A 1 3.392 -7.457 1.433 1.00 -1.52 C

HETATM 49 C MOL A 1 3.464 -5.164 -3.018 1.00 -1.64 C

HETATM 50 C MOL A 1 4.074 -6.847 -2.079 1.00 -1.54 C

HETATM 51 C MOL A 1 5.005 -4.304 5.460 1.00 -1.60 C

HETATM 52 C MOL A 1 5.460 1.030 4.135 1.00 -2.24 C

HETATM 53 C MOL A 1 5.742 -0.172 6.018 1.00 -1.75 C

HETATM 54 C MOL A 1 5.898 -4.016 4.880 1.00 -1.65 C

HETATM 55 C MOL A 1 6.667 1.298 -4.252 1.00 -1.67 C

HETATM 56 C MOL A 1 6.788 -6.342 2.307 1.00 -1.58 C

HETATM 57 C MOL A 1 6.803 -2.933 -3.951 1.00 -1.62 C

HETATM 58 C MOL A 1 6.849 -6.685 0.463 1.00 -1.52 C

HETATM 59 C MOL A 1 6.822 -6.088 -2.193 1.00 -1.56 C

HETATM 60 C MOL A 1 8.199 4.191 -2.705 1.00 -1.50 C

HETATM 61 C MOL A 1 8.761 -3.585 2.848 1.00 -1.65 C

HETATM 62 C MOL A 1 9.032 -2.212 2.726 1.00 -1.70 C

HETATM 63 C MOL A 1 9.193 -5.220 -1.732 1.00 -1.50 C

HETATM 64 C MOL A 1 10.122 -2.232 -3.220 1.00 -1.78 C

HETATM 65 C MOL A 1 10.315 3.994 -2.306 1.00 -1.26 C

HETATM 66 C MOL A 1 10.620 -3.904 0.167 1.00 -1.60 C

HETATM 67 C MOL A 1 12.307 4.081 -1.470 1.00 -1.22 C

HETATM 68 C MOL A 1 12.846 1.363 -4.098 1.00 -1.32 C

HETATM 69 C MOL A 1 14.726 2.690 1.505 1.00 -1.13 C

HETATM 70 C MOL A 1 14.796 3.944 -2.231 1.00 -1.07 C

HETATM 71 C MOL A 1 15.916 -1.008 0.094 1.00 -1.13 C

HETATM 72 C MOL A 1 16.039 0.510 -3.453 1.00 -1.04 C

HETATM 73 C MOL A 1 17.041 4.215 -0.944 1.00 -0.86 C

HETATM 74 C MOL A 1 18.137 1.516 1.583 1.00 -0.83 C

HETATM 75 C MOL A 1 18.222 0.706 -2.148 1.00 -0.84 C

HETATM 1 O MOL A 1 -15.947 -5.412 -1.599 1.00 -2.66 O

HETATM 2 O MOL A 1 -13.649 -1.200 -1.867 1.00 -1.63 O

HETATM 3 O MOL A 1 -13.386 0.070 -0.825 1.00 -1.64 O

HETATM 4 O MOL A 1 -12.239 -3.582 0.893 1.00 -1.65 O

HETATM 5 O MOL A 1 -11.994 -2.312 1.853 1.00 -1.66 O

HETATM 6 O MOL A 1 -10.271 -3.582 -2.704 1.00 -2.08 O

HETATM 7 O MOL A 1 -9.580 3.086 0.039 1.00 -1.76 O

HETATM 8 O MOL A 1 -9.222 2.051 -1.266 1.00 -1.73 O

HETATM 9 O MOL A 1 -8.849 0.423 -2.941 1.00 -1.77 O

HETATM 10 O MOL A 1 -7.976 0.516 2.457 1.00 -1.90 O

HETATM 11 O MOL A 1 -6.591 1.578 -3.064 1.00 -1.77 O

HETATM 12 O MOL A 1 -6.309 0.591 1.504 1.00 -1.89 O

HETATM 13 O MOL A 1 -5.882 3.007 -2.196 1.00 -1.68 O

HETATM 14 O MOL A 1 -5.767 2.925 3.242 1.00 -2.44 O

HETATM 15 O MOL A 1 -3.624 2.530 -3.365 1.00 -1.84 O

HETATM 16 O MOL A 1 -3.537 3.097 2.761 1.00 -2.21 O

HETATM 17 O MOL A 1 -3.452 -2.386 -1.274 1.00 -3.10 O

HETATM 18 O MOL A 1 -2.272 3.245 -3.204 1.00 -1.86 O

HETATM 19 O MOL A 1 -2.224 1.774 -4.290 1.00 -1.91 O

HETATM 20 O MOL A 1 -1.934 6.673 0.469 1.00 -1.91 O

HETATM 21 O MOL A 1 -1.509 -0.724 -1.316 1.00 -2.50 O

HETATM 22 O MOL A 1 -1.533 3.561 2.855 1.00 -2.20 O

HETATM 23 O MOL A 1 -1.182 -0.597 -1.306 1.00 -2.50 O

HETATM 24 O MOL A 1 0.236 -3.069 3.489 1.00 -2.25 O

HETATM 25 O MOL A 1 0.905 -0.422 5.600 1.00 -2.17 O

HETATM 26 O MOL A 1 1.160 5.166 -1.517 1.00 -2.18 O

HETATM 27 O MOL A 1 1.320 -0.085 -1.113 1.00 -4.48 O

HETATM 28 O MOL A 1 1.470 1.010 4.966 1.00 -2.17 O

HETATM 29 O MOL A 1 1.644 4.920 2.868 1.00 -2.60 O

HETATM 30 O MOL A 1 1.903 -5.291 1.822 1.00 -2.05 O

HETATM 31 O MOL A 1 2.660 -4.727 5.677 1.00 -1.94 O

HETATM 32 O MOL A 1 4.538 -5.407 3.779 1.00 -2.01 O

HETATM 33 O MOL A 1 4.787 1.737 -1.943 1.00 -3.16 O

HETATM 34 O MOL A 1 4.956 -7.639 -0.244 1.00 -1.84 O

HETATM 35 O MOL A 1 5.053 -6.420 2.134 1.00 -1.89 O

HETATM 36 O MOL A 1 5.018 -2.153 5.145 1.00 -2.13 O

HETATM 37 O MOL A 1 5.425 1.020 1.494 1.00 -4.37 O

HETATM 38 O MOL A 1 5.839 -6.759 -1.276 1.00 -1.84 O

HETATM 39 O MOL A 1 7.310 -4.542 3.475 1.00 -1.91 O

HETATM 40 O MOL A 1 7.420 -4.556 -3.034 1.00 -1.97 O

HETATM 41 O MOL A 1 7.666 -5.250 -1.431 1.00 -1.78 O

HETATM 42 O MOL A 1 8.693 -4.029 0.869 1.00 -1.95 O

HETATM 43 O MOL A 1 9.643 0.126 -2.714 1.00 -2.49 O

HETATM 44 O MOL A 1 11.960 -1.111 0.714 1.00 -3.42 O

HETATM 45 O MOL A 1 16.171 2.958 0.979 1.00 -1.25 O

HETATM 46 O MOL A 1 17.066 -0.089 -0.045 1.00 -1.25 O

HETATM 47 O MOL A 1 18.563 2.478 -0.625 1.00 -1.18 O

END

**Table SS 17**. Quinolinohopane with WS-biochar of local minima and maxima on the Electrostatic potentials (ESP) surface.

REMARK Unit of B-factor field (i.e. ESP) is eV

REMARK Carbon: Surface maximum Oxygen: surface minimum

HETATM 1 C MOL A 1 -13.614 -1.427 -2.204 1.00 -0.70 C

HETATM 2 C MOL A 1 -13.572 3.382 0.877 1.00 -0.93 C

HETATM 3 C MOL A 1 -11.828 2.557 -2.505 1.00 -0.92 C

HETATM 4 C MOL A 1 -11.422 -4.197 -3.211 1.00 -0.45 C

HETATM 5 C MOL A 1 -10.351 -0.983 -4.090 1.00 -0.47 C

HETATM 6 C MOL A 1 -10.323 2.858 2.966 1.00 -1.10 C

HETATM 7 C MOL A 1 -10.243 5.233 0.115 1.00 -0.96 C

HETATM 8 C MOL A 1 -9.701 -3.023 -4.124 1.00 -0.41 C

HETATM 9 C MOL A 1 -9.119 2.470 -2.571 1.00 -1.01 C

HETATM 10 C MOL A 1 -9.119 5.632 0.825 1.00 -0.93 C

HETATM 11 C MOL A 1 -8.957 -1.815 2.593 1.00 -1.11 C

HETATM 12 C MOL A 1 -8.487 0.406 1.238 1.00 -1.54 C

HETATM 13 C MOL A 1 -8.105 3.008 2.804 1.00 -1.16 C

HETATM 14 C MOL A 1 -8.068 -4.495 -0.266 1.00 -1.70 C

HETATM 15 C MOL A 1 -7.940 5.169 3.228 1.00 -0.85 C

HETATM 16 C MOL A 1 -7.317 4.123 -2.448 1.00 -0.91 C

HETATM 17 C MOL A 1 -7.080 -1.224 -1.074 1.00 -1.77 C

HETATM 18 C MOL A 1 -6.557 -4.652 0.911 1.00 -1.44 C

HETATM 19 C MOL A 1 -6.337 1.909 -1.214 1.00 -1.29 C

HETATM 20 C MOL A 1 -6.032 -4.088 -4.132 1.00 -0.47 C

HETATM 21 C MOL A 1 -5.544 -1.424 0.198 1.00 -1.49 C

HETATM 22 C MOL A 1 -5.316 3.812 -2.582 1.00 -0.83 C

HETATM 23 C MOL A 1 -5.122 6.071 4.598 1.00 -1.10 C

HETATM 24 C MOL A 1 -4.226 -5.321 0.671 1.00 -1.80 C

HETATM 25 C MOL A 1 -4.204 3.254 1.551 1.00 -2.13 C

HETATM 26 C MOL A 1 -4.221 5.397 -3.388 1.00 -0.83 C

HETATM 27 C MOL A 1 -4.090 -3.094 4.165 1.00 -0.96 C

HETATM 28 C MOL A 1 -3.666 2.194 -2.509 1.00 -1.01 C

HETATM 29 C MOL A 1 -3.336 -2.067 0.051 1.00 -1.82 C

HETATM 30 C MOL A 1 -2.818 -6.071 -1.372 1.00 -1.85 C

HETATM 31 C MOL A 1 -2.826 -4.826 -5.409 1.00 -0.79 C

HETATM 32 C MOL A 1 -2.539 -0.914 1.704 1.00 -0.35 C

HETATM 33 C MOL A 1 -2.194 -2.669 -1.709 1.00 -2.03 C

HETATM 34 C MOL A 1 -2.119 3.603 1.408 1.00 -1.95 C

HETATM 35 C MOL A 1 -1.752 -5.884 0.827 1.00 -1.78 C

HETATM 36 C MOL A 1 -1.731 8.647 0.281 1.00 -1.35 C

HETATM 37 C MOL A 1 -0.793 4.111 -3.733 1.00 -0.99 C

HETATM 38 C MOL A 1 -0.778 -5.697 5.364 1.00 -1.04 C

HETATM 39 C MOL A 1 0.002 -3.252 -1.788 1.00 -2.00 C

HETATM 40 C MOL A 1 0.377 -2.705 6.272 1.00 -1.21 C

HETATM 41 C MOL A 1 0.350 3.526 1.307 1.00 -1.48 C

HETATM 42 C MOL A 1 0.564 -8.005 -2.258 1.00 -1.07 C

HETATM 43 C MOL A 1 0.505 7.956 -2.554 1.00 -0.99 C

HETATM 44 C MOL A 1 0.638 2.932 0.680 1.00 -1.49 C

HETATM 45 C MOL A 1 0.572 7.867 3.226 1.00 -1.23 C

HETATM 46 C MOL A 1 0.795 -6.269 1.105 1.00 -1.79 C

HETATM 47 C MOL A 1 0.939 -3.435 -1.955 1.00 -2.05 C

HETATM 48 C MOL A 1 0.886 1.200 -0.437 1.00 -1.83 C

HETATM 49 C MOL A 1 1.020 -2.958 0.189 1.00 -2.19 C

HETATM 50 C MOL A 1 1.150 4.326 3.451 1.00 -1.44 C

HETATM 51 C MOL A 1 1.657 9.366 1.381 1.00 -1.09 C

HETATM 52 C MOL A 1 2.065 5.381 3.647 1.00 -1.44 C

HETATM 53 C MOL A 1 2.201 -2.783 6.196 1.00 -1.11 C

HETATM 54 C MOL A 1 2.232 0.545 1.620 1.00 -2.24 C

HETATM 55 C MOL A 1 2.382 -5.713 3.133 1.00 -1.94 C

HETATM 56 C MOL A 1 2.363 -2.494 1.784 1.00 -2.43 C

HETATM 57 C MOL A 1 2.462 -5.495 -5.323 1.00 -0.91 C

HETATM 58 C MOL A 1 2.398 1.518 -3.443 1.00 -1.69 C

HETATM 59 C MOL A 1 2.546 5.560 -4.239 1.00 -1.24 C

HETATM 60 C MOL A 1 2.602 -1.991 -2.360 1.00 -2.11 C

HETATM 61 C MOL A 1 3.091 -2.944 0.193 1.00 -2.34 C

HETATM 62 C MOL A 1 3.159 8.255 1.538 1.00 -1.25 C

HETATM 63 C MOL A 1 3.236 9.439 -0.218 1.00 -1.14 C

HETATM 64 C MOL A 1 3.494 -6.298 0.974 1.00 -1.85 C

HETATM 65 C MOL A 1 3.848 -3.057 -1.690 1.00 -2.27 C

HETATM 66 C MOL A 1 3.811 -2.141 1.943 1.00 -2.48 C

HETATM 67 C MOL A 1 3.873 1.743 -4.258 1.00 -1.76 C

HETATM 68 C MOL A 1 4.332 8.007 -3.614 1.00 -1.16 C

HETATM 69 C MOL A 1 4.372 8.182 1.547 1.00 -1.25 C

HETATM 70 C MOL A 1 4.780 -5.398 3.145 1.00 -1.81 C

HETATM 71 C MOL A 1 5.063 -1.194 -3.406 1.00 -2.09 C

HETATM 72 C MOL A 1 5.483 8.905 -1.954 1.00 -1.21 C

HETATM 73 C MOL A 1 5.985 -5.793 0.941 1.00 -2.13 C

HETATM 74 C MOL A 1 6.176 4.203 -5.070 1.00 -1.47 C

HETATM 75 C MOL A 1 6.755 -4.359 -5.034 1.00 0.69 C

HETATM 76 C MOL A 1 7.383 1.417 -4.276 1.00 -1.82 C

HETATM 77 C MOL A 1 7.583 6.336 -2.432 1.00 -1.46 C

HETATM 78 C MOL A 1 7.801 7.002 -0.030 1.00 -1.40 C

HETATM 79 C MOL A 1 7.974 -3.332 4.279 1.00 -2.18 C

HETATM 80 C MOL A 1 8.983 -3.959 -0.675 1.00 -2.08 C

HETATM 81 C MOL A 1 9.933 -3.733 1.709 1.00 -1.93 C

HETATM 1 O MOL A 1 -12.223 3.927 -0.756 1.00 -1.29 O

HETATM 2 O MOL A 1 -11.261 -0.944 1.796 1.00 -2.74 O

HETATM 3 O MOL A 1 -10.919 4.129 1.863 1.00 -1.31 O

HETATM 4 O MOL A 1 -10.554 0.243 -0.831 1.00 -1.70 O

HETATM 5 O MOL A 1 -9.305 3.939 -1.153 1.00 -1.25 O

HETATM 6 O MOL A 1 -8.865 -4.331 0.213 1.00 -1.77 O

HETATM 7 O MOL A 1 -8.095 -4.840 -1.074 1.00 -1.79 O

HETATM 8 O MOL A 1 -7.691 -0.703 -0.592 1.00 -1.84 O

HETATM 9 O MOL A 1 -6.931 -1.270 -1.884 1.00 -1.85 O

HETATM 10 O MOL A 1 -6.421 -1.894 2.897 1.00 -2.29 O

HETATM 11 O MOL A 1 -5.225 6.853 1.149 1.00 -2.07 O

HETATM 12 O MOL A 1 -4.688 2.951 1.214 1.00 -2.17 O

HETATM 13 O MOL A 1 -4.602 3.259 2.420 1.00 -2.23 O

HETATM 14 O MOL A 1 -3.988 -5.400 1.862 1.00 -1.97 O

HETATM 15 O MOL A 1 -3.589 -5.982 -0.526 1.00 -1.93 O

HETATM 16 O MOL A 1 -3.423 -6.208 -2.032 1.00 -1.95 O

HETATM 17 O MOL A 1 -2.559 6.799 -0.367 1.00 -1.86 O

HETATM 18 O MOL A 1 -2.431 -2.510 -2.568 1.00 -2.12 O

HETATM 19 O MOL A 1 -2.050 6.045 4.024 1.00 -3.13 O

HETATM 20 O MOL A 1 -1.967 3.208 0.752 1.00 -2.01 O

HETATM 21 O MOL A 1 -1.564 -5.920 1.963 1.00 -1.97 O

HETATM 22 O MOL A 1 -0.254 -6.464 0.831 1.00 -1.87 O

HETATM 23 O MOL A 1 0.264 -1.014 3.147 1.00 -3.29 O

HETATM 24 O MOL A 1 0.426 -3.462 -3.676 1.00 -2.61 O

HETATM 25 O MOL A 1 1.580 9.194 -0.761 1.00 -1.48 O

HETATM 26 O MOL A 1 1.685 -6.157 2.578 1.00 -2.00 O

HETATM 27 O MOL A 1 2.393 -3.160 -2.732 1.00 -2.42 O

HETATM 28 O MOL A 1 2.320 0.948 1.000 1.00 -2.27 O

HETATM 29 O MOL A 1 2.621 -5.515 4.125 1.00 -2.04 O

HETATM 30 O MOL A 1 2.545 6.988 -3.614 1.00 -1.44 O

HETATM 31 O MOL A 1 2.747 8.575 0.719 1.00 -1.30 O

HETATM 32 O MOL A 1 3.024 9.223 -2.416 1.00 -1.46 O

HETATM 33 O MOL A 1 3.136 -6.229 2.498 1.00 -2.00 O

HETATM 34 O MOL A 1 3.173 2.240 -2.911 1.00 -1.85 O

HETATM 35 O MOL A 1 3.788 -0.640 -3.093 1.00 -2.29 O

HETATM 36 O MOL A 1 4.446 -2.751 -2.491 1.00 -2.46 O

HETATM 37 O MOL A 1 5.302 -6.618 -2.264 1.00 -2.10 O

HETATM 38 O MOL A 1 5.598 -1.783 3.432 1.00 -3.59 O

HETATM 39 O MOL A 1 6.284 7.164 -2.887 1.00 -1.63 O

HETATM 40 O MOL A 1 6.510 0.001 3.846 1.00 -4.59 O

HETATM 41 O MOL A 1 6.943 7.366 -1.709 1.00 -1.64 O

HETATM 42 O MOL A 1 7.383 -5.598 0.196 1.00 -2.35 O

HETATM 43 O MOL A 1 7.611 -2.619 -2.271 1.00 -3.19 O

HETATM 44 O MOL A 1 8.240 -4.234 3.054 1.00 -2.34 O

HETATM 45 O MOL A 1 8.430 0.880 1.159 1.00 -4.75 O

END

**Table SS 18**. DOCHN with WS-biochar of local minima and maxima on the Electrostatic potentials (ESP) surface.

REMARK Unit of B-factor field (i.e. ESP) is eV

REMARK Carbon: Surface maximum Oxygen: surface minimum

HETATM 1 C MOL A 1 -13.904 2.464 1.074 1.00 -1.70 C

HETATM 2 C MOL A 1 -13.439 0.954 -2.339 1.00 -1.79 C

HETATM 3 C MOL A 1 -12.580 -0.956 0.675 1.00 -1.93 C

HETATM 4 C MOL A 1 -11.868 4.160 -1.157 1.00 -1.89 C

HETATM 5 C MOL A 1 -11.400 3.945 2.773 1.00 -1.84 C

HETATM 6 C MOL A 1 -11.222 0.397 2.820 1.00 -2.02 C

HETATM 7 C MOL A 1 -9.327 4.673 -0.045 1.00 -2.18 C

HETATM 8 C MOL A 1 -8.603 3.902 3.699 1.00 -2.01 C

HETATM 9 C MOL A 1 -8.284 0.413 3.447 1.00 -2.22 C

HETATM 10 C MOL A 1 -7.511 -4.458 -1.877 1.00 -1.66 C

HETATM 11 C MOL A 1 -6.873 -0.569 -5.136 1.00 -1.96 C

HETATM 12 C MOL A 1 -6.318 4.899 0.904 1.00 -2.15 C

HETATM 13 C MOL A 1 -5.604 3.787 4.362 1.00 -1.86 C

HETATM 14 C MOL A 1 -4.721 -7.704 0.435 1.00 0.84 C

HETATM 15 C MOL A 1 -3.907 4.784 1.165 1.00 -1.90 C

HETATM 16 C MOL A 1 -3.673 -1.808 6.319 1.00 -1.16 C

HETATM 17 C MOL A 1 -3.117 -1.427 -4.942 1.00 -1.80 C

HETATM 18 C MOL A 1 -3.015 -2.962 7.884 1.00 -0.95 C

HETATM 19 C MOL A 1 -2.917 4.187 4.462 1.00 -1.61 C

HETATM 20 C MOL A 1 -2.781 -1.201 2.494 1.00 -1.88 C

HETATM 21 C MOL A 1 -2.645 -3.633 -0.017 1.00 -2.15 C

HETATM 22 C MOL A 1 -2.523 4.352 -0.689 1.00 -1.85 C

HETATM 23 C MOL A 1 -1.859 -1.894 -0.910 1.00 -2.22 C

HETATM 24 C MOL A 1 -1.775 5.789 2.755 1.00 -1.48 C

HETATM 25 C MOL A 1 -1.609 -3.306 -4.056 1.00 -1.82 C

HETATM 26 C MOL A 1 -1.536 3.034 -4.701 1.00 -1.06 C

HETATM 27 C MOL A 1 -1.384 -0.090 -1.554 1.00 -2.32 C

HETATM 28 C MOL A 1 -1.162 5.144 -2.366 1.00 -1.53 C

HETATM 29 C MOL A 1 -0.834 -1.060 -4.848 1.00 -1.91 C

HETATM 30 C MOL A 1 -0.614 7.339 0.953 1.00 -1.37 C

HETATM 31 C MOL A 1 -0.524 0.453 8.177 1.00 -2.14 C

HETATM 32 C MOL A 1 -0.494 4.702 4.570 1.00 -1.32 C

HETATM 33 C MOL A 1 -0.212 -7.578 0.431 1.00 -0.85 C

HETATM 34 C MOL A 1 -0.139 -3.582 9.999 1.00 -0.78 C

HETATM 35 C MOL A 1 0.181 6.412 -3.886 1.00 -1.24 C

HETATM 36 C MOL A 1 0.205 -1.352 -0.744 1.00 -2.07 C

HETATM 37 C MOL A 1 0.279 -3.417 0.198 1.00 -2.00 C

HETATM 38 C MOL A 1 0.310 3.641 -4.322 1.00 -1.11 C

HETATM 39 C MOL A 1 0.674 -1.953 5.972 1.00 -2.23 C

HETATM 40 C MOL A 1 0.766 8.886 -0.750 1.00 -1.18 C

HETATM 41 C MOL A 1 0.945 -2.630 -3.856 1.00 -1.74 C

HETATM 42 C MOL A 1 1.471 -2.867 0.356 1.00 -1.97 C

HETATM 43 C MOL A 1 1.482 7.856 -5.359 1.00 -1.02 C

HETATM 44 C MOL A 1 1.667 4.417 2.535 1.00 -1.37 C

HETATM 45 C MOL A 1 1.869 -6.261 -3.053 1.00 -1.03 C

HETATM 46 C MOL A 1 1.866 2.691 2.972 1.00 -1.30 C

HETATM 47 C MOL A 1 2.023 1.276 -5.966 1.00 -0.96 C

HETATM 48 C MOL A 1 2.103 10.345 -2.286 1.00 -0.98 C

HETATM 49 C MOL A 1 2.545 2.285 5.331 1.00 -1.04 C

HETATM 50 C MOL A 1 2.928 6.292 1.017 1.00 -1.29 C

HETATM 51 C MOL A 1 3.042 -1.680 9.687 1.00 -0.77 C

HETATM 52 C MOL A 1 3.305 1.827 0.052 1.00 -0.13 C

HETATM 53 C MOL A 1 3.325 -2.233 -3.221 1.00 -1.72 C

HETATM 54 C MOL A 1 3.531 -2.039 0.862 1.00 -1.98 C

HETATM 55 C MOL A 1 3.507 1.017 7.083 1.00 -0.90 C

HETATM 56 C MOL A 1 3.780 5.318 -3.774 1.00 -1.16 C

HETATM 57 C MOL A 1 4.175 10.384 -5.427 1.00 -0.81 C

HETATM 58 C MOL A 1 4.348 7.868 -0.589 1.00 -1.10 C

HETATM 59 C MOL A 1 4.469 -0.094 0.251 1.00 -1.73 C

HETATM 60 C MOL A 1 4.643 -3.792 -1.922 1.00 -1.79 C

HETATM 61 C MOL A 1 4.811 2.544 -3.070 1.00 -0.81 C

HETATM 62 C MOL A 1 4.881 -6.093 1.621 1.00 -0.77 C

HETATM 63 C MOL A 1 5.198 6.684 -5.179 1.00 -0.93 C

HETATM 64 C MOL A 1 5.711 -1.598 -2.586 1.00 -1.75 C

HETATM 65 C MOL A 1 5.767 9.284 -2.102 1.00 -0.90 C

HETATM 66 C MOL A 1 6.645 0.736 0.700 1.00 -1.41 C

HETATM 67 C MOL A 1 7.736 -4.138 1.464 1.00 -0.45 C

HETATM 68 C MOL A 1 7.834 -0.634 -2.247 1.00 -1.39 C

HETATM 69 C MOL A 1 8.296 0.159 1.624 1.00 -1.71 C

HETATM 70 C MOL A 1 9.659 2.797 -1.157 1.00 -1.07 C

HETATM 71 C MOL A 1 11.352 -3.026 2.139 1.00 -0.39 C

HETATM 72 C MOL A 1 11.866 -1.479 3.724 1.00 -0.45 C

HETATM 73 C MOL A 1 12.966 -2.884 0.745 1.00 -0.43 C

HETATM 74 C MOL A 1 14.920 0.018 2.074 1.00 -0.67 C

HETATM 1 O MOL A 1 -13.452 0.468 -0.203 1.00 -2.20 O

HETATM 2 O MOL A 1 -12.156 0.575 1.492 1.00 -2.23 O

HETATM 3 O MOL A 1 -9.526 1.816 3.249 1.00 -2.48 O

HETATM 4 O MOL A 1 -8.044 4.275 1.302 1.00 -2.50 O

HETATM 5 O MOL A 1 -7.459 0.129 0.314 1.00 -4.54 O

HETATM 6 O MOL A 1 -7.350 1.891 3.752 1.00 -2.46 O

HETATM 7 O MOL A 1 -7.263 1.736 -1.236 1.00 -4.56 O

HETATM 8 O MOL A 1 -6.311 -4.805 0.001 1.00 -2.66 O

HETATM 9 O MOL A 1 -5.582 -3.631 -4.143 1.00 -2.30 O

HETATM 10 O MOL A 1 -5.415 -0.235 0.374 1.00 -4.45 O

HETATM 11 O MOL A 1 -4.764 1.140 -2.030 1.00 -4.67 O

HETATM 12 O MOL A 1 -3.136 4.940 0.907 1.00 -1.97 O

HETATM 13 O MOL A 1 -2.914 -4.249 0.637 1.00 -2.30 O

HETATM 14 O MOL A 1 -2.840 -6.367 -2.698 1.00 -2.01 O

HETATM 15 O MOL A 1 -2.080 1.529 6.470 1.00 -2.29 O

HETATM 16 O MOL A 1 -1.628 -2.032 -4.926 1.00 -1.97 O

HETATM 17 O MOL A 1 -1.240 -0.335 -5.375 1.00 -2.01 O

HETATM 18 O MOL A 1 -0.908 -4.138 0.748 1.00 -2.35 O

HETATM 19 O MOL A 1 -0.825 -1.128 3.998 1.00 -2.42 O

HETATM 20 O MOL A 1 -0.739 0.019 8.715 1.00 -2.19 O

HETATM 21 O MOL A 1 -0.271 5.477 2.183 1.00 -1.66 O

HETATM 22 O MOL A 1 -0.139 -1.604 -4.758 1.00 -1.95 O

HETATM 23 O MOL A 1 -0.121 0.304 8.687 1.00 -2.19 O

HETATM 24 O MOL A 1 0.188 -0.447 3.860 1.00 -2.41 O

HETATM 25 O MOL A 1 0.291 -2.128 -0.179 1.00 -2.19 O

HETATM 26 O MOL A 1 0.254 1.732 -1.172 1.00 -2.97 O

HETATM 27 O MOL A 1 0.436 -2.566 6.264 1.00 -2.28 O

HETATM 28 O MOL A 1 1.229 -4.553 1.345 1.00 -2.62 O

HETATM 29 O MOL A 1 1.326 -2.040 6.179 1.00 -2.28 O

HETATM 30 O MOL A 1 1.960 -2.844 -3.744 1.00 -1.81 O

HETATM 31 O MOL A 1 2.009 3.400 -0.137 1.00 -1.93 O

HETATM 32 O MOL A 1 2.411 -2.010 0.633 1.00 -2.07 O

HETATM 33 O MOL A 1 2.500 3.640 -2.504 1.00 -2.27 O

HETATM 34 O MOL A 1 2.979 -1.356 -4.010 1.00 -1.90 O

HETATM 35 O MOL A 1 3.595 8.049 -5.640 1.00 -1.23 O

HETATM 36 O MOL A 1 3.849 -2.593 1.578 1.00 -2.10 O

HETATM 37 O MOL A 1 4.156 10.294 -3.068 1.00 -1.20 O

HETATM 38 O MOL A 1 5.271 -2.960 -2.378 1.00 -1.87 O

HETATM 39 O MOL A 1 5.295 -0.773 -3.428 1.00 -1.90 O

HETATM 40 O MOL A 1 5.345 -4.300 -1.572 1.00 -1.90 O

HETATM 41 O MOL A 1 7.357 2.562 -1.633 1.00 -2.20 O

HETATM 42 O MOL A 1 7.409 2.505 -1.792 1.00 -2.20 O

HETATM 43 O MOL A 1 8.299 -0.569 2.173 1.00 -1.80 O

HETATM 44 O MOL A 1 8.854 0.939 1.697 1.00 -1.78 O

HETATM 45 O MOL A 1 9.568 -2.068 -1.145 1.00 -1.76 O

HETATM 46 O MOL A 1 10.159 -0.685 -1.594 1.00 -1.75 O

HETATM 47 O MOL A 1 13.122 2.731 0.185 1.00 -2.75 O

END

**Table SS 19**. PHPN with WS-biochar of local minima and maxima on the Electrostatic potentials (ESP) surface.

REMARK Unit of B-factor field (i.e. ESP) is eV

REMARK Carbon: Surface maximum Oxygen: surface minimum

HETATM 1 C MOL A 1 -12.178 0.674 4.888 1.00 -2.00 C

HETATM 2 C MOL A 1 -11.609 -2.243 3.862 1.00 -2.06 C

HETATM 3 C MOL A 1 -10.748 -4.319 4.503 1.00 -1.66 C

HETATM 4 C MOL A 1 -9.473 2.896 5.292 1.00 -2.06 C

HETATM 5 C MOL A 1 -8.791 -0.686 5.898 1.00 -2.22 C

HETATM 6 C MOL A 1 -8.393 -6.825 3.862 1.00 -1.46 C

HETATM 7 C MOL A 1 -8.202 0.529 -4.143 1.00 -1.65 C

HETATM 8 C MOL A 1 -8.141 4.643 -1.059 1.00 -1.96 C

HETATM 9 C MOL A 1 -5.445 -6.384 1.722 1.00 -1.55 C

HETATM 10 C MOL A 1 -5.118 -2.181 -1.536 1.00 -2.27 C

HETATM 11 C MOL A 1 -4.887 -2.208 -6.471 1.00 0.84 C

HETATM 12 C MOL A 1 -4.805 -5.014 -0.713 1.00 -1.72 C

HETATM 13 C MOL A 1 -4.408 4.527 -1.615 1.00 -1.79 C

HETATM 14 C MOL A 1 -3.376 -4.513 2.575 1.00 -1.84 C

HETATM 15 C MOL A 1 -3.210 5.603 2.915 1.00 -1.05 C

HETATM 16 C MOL A 1 -3.200 -0.663 -2.477 1.00 -2.09 C

HETATM 17 C MOL A 1 -2.833 1.042 4.153 1.00 -2.01 C

HETATM 18 C MOL A 1 -2.755 0.718 -0.900 1.00 -2.15 C

HETATM 19 C MOL A 1 -2.663 3.445 -3.043 1.00 -1.82 C

HETATM 20 C MOL A 1 -2.500 1.782 0.693 1.00 -2.29 C

HETATM 21 C MOL A 1 -2.261 -2.494 4.508 1.00 -1.76 C

HETATM 22 C MOL A 1 -2.184 4.802 -1.058 1.00 -1.90 C

HETATM 23 C MOL A 1 -1.871 -4.488 -2.330 1.00 -1.39 C

HETATM 24 C MOL A 1 -1.431 5.554 3.743 1.00 -1.13 C

HETATM 25 C MOL A 1 -0.903 -4.232 2.588 1.00 -1.58 C

HETATM 26 C MOL A 1 -0.753 0.905 -0.258 1.00 -2.01 C

HETATM 27 C MOL A 1 -0.590 -0.765 -1.682 1.00 -1.91 C

HETATM 28 C MOL A 1 -0.449 -1.636 -6.067 1.00 -0.83 C

HETATM 29 C MOL A 1 -0.446 -0.451 -1.936 1.00 -1.94 C

HETATM 30 C MOL A 1 -0.210 3.766 -2.168 1.00 -1.72 C

HETATM 31 C MOL A 1 -0.026 -5.885 0.529 1.00 -1.35 C

HETATM 32 C MOL A 1 0.180 -2.185 4.456 1.00 -1.51 C

HETATM 33 C MOL A 1 0.209 6.865 1.176 1.00 -0.96 C

HETATM 34 C MOL A 1 0.428 -3.220 -3.690 1.00 -1.54 C

HETATM 35 C MOL A 1 0.724 -0.610 -0.829 1.00 -1.92 C

HETATM 36 C MOL A 1 0.837 -3.922 3.002 1.00 -1.40 C

HETATM 37 C MOL A 1 0.835 -0.276 -1.294 1.00 -1.95 C

HETATM 38 C MOL A 1 1.064 2.247 -5.494 1.00 -1.04 C

HETATM 39 C MOL A 1 1.367 -5.527 -3.139 1.00 -1.08 C

HETATM 40 C MOL A 1 2.112 3.635 -1.535 1.00 -1.69 C

HETATM 41 C MOL A 1 2.267 1.389 3.154 1.00 -0.17 C

HETATM 42 C MOL A 1 3.301 4.811 3.154 1.00 -0.79 C

HETATM 43 C MOL A 1 3.773 -4.868 -3.593 1.00 -0.86 C

HETATM 44 C MOL A 1 3.751 -1.509 3.269 1.00 -1.04 C

HETATM 45 C MOL A 1 3.729 2.221 -2.726 1.00 -1.78 C

HETATM 46 C MOL A 1 4.484 3.602 -0.737 1.00 -1.73 C

HETATM 47 C MOL A 1 4.525 -1.630 -4.234 1.00 -0.87 C

HETATM 48 C MOL A 1 5.669 -4.813 0.622 1.00 -2.00 C

HETATM 49 C MOL A 1 5.861 1.178 2.304 1.00 -1.39 C

HETATM 50 C MOL A 1 6.053 -1.745 3.429 1.00 -0.94 C

HETATM 51 C MOL A 1 6.133 -4.968 -3.545 1.00 -0.71 C

HETATM 52 C MOL A 1 6.491 3.872 0.235 1.00 -1.38 C

HETATM 53 C MOL A 1 7.418 -7.345 -1.774 1.00 -0.79 C

HETATM 54 C MOL A 1 7.561 -0.315 -2.364 1.00 -0.58 C

HETATM 55 C MOL A 1 7.658 0.508 2.042 1.00 -1.70 C

HETATM 56 C MOL A 1 7.953 -2.033 3.671 1.00 -0.88 C

HETATM 57 C MOL A 1 8.293 3.212 -0.141 1.00 -1.66 C

HETATM 58 C MOL A 1 8.366 -4.331 -3.767 1.00 -0.69 C

HETATM 59 C MOL A 1 8.378 4.004 3.860 1.00 -1.04 C

HETATM 60 C MOL A 1 9.795 -4.795 1.718 1.00 -0.68 C

HETATM 61 C MOL A 1 10.135 -1.543 0.142 1.00 -0.64 C

HETATM 62 C MOL A 1 10.319 -2.596 -0.907 1.00 -0.63 C

HETATM 63 C MOL A 1 10.963 -6.171 -1.932 1.00 -0.60 C

HETATM 64 C MOL A 1 11.001 -0.197 -0.900 1.00 -0.36 C

HETATM 65 C MOL A 1 11.684 -1.189 0.839 1.00 -0.42 C

HETATM 66 C MOL A 1 12.274 1.556 -1.201 1.00 -0.41 C

HETATM 67 C MOL A 1 14.290 1.289 1.922 1.00 -0.65 C

HETATM 1 O MOL A 1 -11.126 0.852 0.070 1.00 -4.51 O

HETATM 2 O MOL A 1 -10.404 -0.800 4.851 1.00 -2.52 O

HETATM 3 O MOL A 1 -9.632 0.684 5.548 1.00 -2.51 O

HETATM 4 O MOL A 1 -6.961 -2.348 3.618 1.00 -3.28 O

HETATM 5 O MOL A 1 -6.815 -1.323 -3.917 1.00 -2.68 O

HETATM 6 O MOL A 1 -6.488 3.053 -3.714 1.00 -2.29 O

HETATM 7 O MOL A 1 -6.089 1.938 1.552 1.00 -4.64 O

HETATM 8 O MOL A 1 -5.757 0.232 -0.150 1.00 -4.22 O

HETATM 9 O MOL A 1 -4.421 -4.745 1.239 1.00 -1.99 O

HETATM 10 O MOL A 1 -3.522 -1.449 -2.969 1.00 -2.26 O

HETATM 11 O MOL A 1 -3.466 1.364 -5.742 1.00 -2.00 O

HETATM 12 O MOL A 1 -2.897 4.563 -2.010 1.00 -1.96 O

HETATM 13 O MOL A 1 -2.695 5.480 -0.458 1.00 -2.00 O

HETATM 14 O MOL A 1 -1.462 -1.317 -2.710 1.00 -2.26 O

HETATM 15 O MOL A 1 -1.516 4.720 -1.422 1.00 -1.94 O

HETATM 16 O MOL A 1 -0.948 2.324 3.386 1.00 -3.08 O

HETATM 17 O MOL A 1 0.196 -1.074 -2.215 1.00 -2.20 O

HETATM 18 O MOL A 1 0.438 -0.193 -1.054 1.00 -1.98 O

HETATM 19 O MOL A 1 0.682 3.708 -2.408 1.00 -1.79 O

HETATM 20 O MOL A 1 1.007 -1.074 -1.743 1.00 -2.22 O

HETATM 21 O MOL A 1 1.640 -1.760 -3.888 1.00 -2.40 O

HETATM 22 O MOL A 1 1.556 4.491 -0.973 1.00 -1.88 O

HETATM 23 O MOL A 1 3.062 -4.948 0.206 1.00 -2.15 O

HETATM 24 O MOL A 1 3.080 -4.532 1.028 1.00 -2.15 O

HETATM 25 O MOL A 1 3.292 -0.835 -0.423 1.00 -2.53 O

HETATM 26 O MOL A 1 3.848 4.482 -0.220 1.00 -1.88 O

HETATM 27 O MOL A 1 4.165 2.974 -2.049 1.00 -1.86 O

HETATM 28 O MOL A 1 4.465 1.827 -3.202 1.00 -1.89 O

HETATM 29 O MOL A 1 5.197 -1.868 -2.057 1.00 -1.84 O

HETATM 30 O MOL A 1 5.509 -4.647 1.330 1.00 -2.04 O

HETATM 31 O MOL A 1 6.046 4.079 3.428 1.00 -2.17 O

HETATM 32 O MOL A 1 8.300 0.602 2.598 1.00 -1.75 O

HETATM 33 O MOL A 1 8.454 2.825 -0.897 1.00 -1.74 O

HETATM 34 O MOL A 1 8.867 -6.832 -2.451 1.00 -1.01 O

HETATM 35 O MOL A 1 8.932 3.780 0.444 1.00 -1.73 O

HETATM 36 O MOL A 1 12.047 3.392 4.112 1.00 -2.73 O

END

**Table SS 20**. Squalane with WS-biochar of local minima and maxima on the Electrostatic potentials (ESP) surface.

REMARK Unit of B-factor field (i.e. ESP) is eV

REMARK Carbon: Surface maximum Oxygen: surface minimum

HETATM 1 C MOL A 1 -13.884 4.507 -1.501 1.00 -1.97 C

HETATM 2 C MOL A 1 -13.683 2.746 -3.904 1.00 -1.95 C

HETATM 3 C MOL A 1 -11.673 6.841 -2.858 1.00 -1.87 C

HETATM 4 C MOL A 1 -11.515 5.008 -5.398 1.00 -1.87 C

HETATM 5 C MOL A 1 -10.945 5.788 0.406 1.00 -2.11 C

HETATM 6 C MOL A 1 -10.485 1.617 -5.329 1.00 -2.10 C

HETATM 7 C MOL A 1 -10.284 -3.002 -0.516 1.00 -2.01 C

HETATM 8 C MOL A 1 -9.732 -0.741 3.968 1.00 -1.67 C

HETATM 9 C MOL A 1 -9.072 6.060 0.071 1.00 -2.21 C

HETATM 10 C MOL A 1 -9.052 6.087 -3.889 1.00 -2.13 C

HETATM 11 C MOL A 1 -8.408 2.828 -4.528 1.00 -2.46 C

HETATM 12 C MOL A 1 -6.633 -3.956 -0.159 1.00 -1.84 C

HETATM 13 C MOL A 1 -6.332 5.871 -3.414 1.00 -2.08 C

HETATM 14 C MOL A 1 -6.135 6.235 0.143 1.00 -2.01 C

HETATM 15 C MOL A 1 -6.100 -0.094 7.247 1.00 0.83 C

HETATM 16 C MOL A 1 -5.799 3.149 -4.732 1.00 -2.13 C

HETATM 17 C MOL A 1 -5.401 -3.043 -4.684 1.00 -1.13 C

HETATM 18 C MOL A 1 -4.768 -3.995 1.588 1.00 -1.86 C

HETATM 19 C MOL A 1 -4.539 -0.042 2.932 1.00 -2.19 C

HETATM 20 C MOL A 1 -4.434 -4.371 -0.860 1.00 -1.96 C

HETATM 21 C MOL A 1 -4.191 -0.634 0.971 1.00 -2.29 C

HETATM 22 C MOL A 1 -4.067 -0.922 -1.039 1.00 -2.42 C

HETATM 23 C MOL A 1 -3.913 5.648 0.197 1.00 -1.85 C

HETATM 24 C MOL A 1 -3.656 4.974 -3.457 1.00 -1.88 C

HETATM 25 C MOL A 1 -3.564 -3.032 -5.455 1.00 -1.21 C

HETATM 26 C MOL A 1 -2.565 1.872 -3.124 1.00 -2.08 C

HETATM 27 C MOL A 1 -2.291 -4.291 0.570 1.00 -1.78 C

HETATM 28 C MOL A 1 -2.288 -0.876 0.174 1.00 -2.13 C

HETATM 29 C MOL A 1 -2.207 -5.556 -3.795 1.00 -1.03 C

HETATM 30 C MOL A 1 -2.213 0.225 -1.183 1.00 -2.18 C

HETATM 31 C MOL A 1 -1.850 -1.177 6.469 1.00 -0.86 C

HETATM 32 C MOL A 1 -1.775 5.127 0.913 1.00 -1.59 C

HETATM 33 C MOL A 1 -1.685 -0.523 2.375 1.00 -2.00 C

HETATM 34 C MOL A 1 -0.946 -4.689 4.127 1.00 -1.06 C

HETATM 35 C MOL A 1 -0.958 4.657 -2.822 1.00 -1.59 C

HETATM 36 C MOL A 1 -0.561 -0.529 1.653 1.00 -1.97 C

HETATM 37 C MOL A 1 0.012 4.848 1.858 1.00 -1.38 C

HETATM 38 C MOL A 1 0.154 -4.198 -0.062 1.00 -1.75 C

HETATM 39 C MOL A 1 0.630 2.752 -3.544 1.00 -1.43 C

HETATM 40 C MOL A 1 0.793 -0.262 -3.331 1.00 -0.41 C

HETATM 41 C MOL A 1 1.247 -3.239 -4.801 1.00 -0.88 C

HETATM 42 C MOL A 1 1.463 -0.384 0.674 1.00 -2.02 C

HETATM 43 C MOL A 1 1.503 4.736 -1.717 1.00 -1.36 C

HETATM 44 C MOL A 1 1.850 -3.728 1.587 1.00 -1.81 C

HETATM 45 C MOL A 1 2.071 -0.724 -1.419 1.00 -1.76 C

HETATM 46 C MOL A 1 2.449 -4.086 -0.797 1.00 -1.77 C

HETATM 47 C MOL A 1 2.701 5.686 3.496 1.00 -0.97 C

HETATM 48 C MOL A 1 3.011 1.625 -1.225 1.00 -1.42 C

HETATM 49 C MOL A 1 3.281 -1.044 4.556 1.00 -0.76 C

HETATM 50 C MOL A 1 3.737 1.005 3.674 1.00 -1.11 C

HETATM 51 C MOL A 1 3.806 4.978 -0.235 1.00 -1.15 C

HETATM 52 C MOL A 1 4.052 2.358 5.476 1.00 -0.90 C

HETATM 53 C MOL A 1 4.219 -0.707 -2.531 1.00 -1.43 C

HETATM 54 C MOL A 1 4.503 -4.108 -1.985 1.00 -1.42 C

HETATM 55 C MOL A 1 5.275 1.205 -0.197 1.00 -1.20 C

HETATM 56 C MOL A 1 5.799 -1.527 2.235 1.00 -0.47 C

HETATM 57 C MOL A 1 5.792 0.378 3.973 1.00 -0.86 C

HETATM 58 C MOL A 1 5.964 5.146 1.039 1.00 -0.97 C

HETATM 59 C MOL A 1 6.095 -0.444 -1.911 1.00 -1.72 C

HETATM 60 C MOL A 1 6.301 -3.916 -1.417 1.00 -1.70 C

HETATM 61 C MOL A 1 6.333 5.368 4.675 1.00 -0.78 C

HETATM 62 C MOL A 1 6.391 -2.759 -5.319 1.00 -1.09 C

HETATM 63 C MOL A 1 7.377 1.813 5.427 1.00 -0.77 C

HETATM 64 C MOL A 1 7.600 -1.013 2.698 1.00 -0.71 C

HETATM 65 C MOL A 1 7.720 3.963 4.062 1.00 -0.81 C

HETATM 66 C MOL A 1 7.932 4.021 0.318 1.00 -0.86 C

HETATM 67 C MOL A 1 9.347 4.395 2.534 1.00 -0.74 C

HETATM 68 C MOL A 1 9.452 -1.766 0.720 1.00 -0.44 C

HETATM 69 C MOL A 1 9.628 3.086 -1.899 1.00 -0.73 C

HETATM 70 C MOL A 1 9.977 -0.848 4.358 1.00 -0.63 C

HETATM 71 C MOL A 1 10.138 -0.037 -0.251 1.00 -0.54 C

HETATM 72 C MOL A 1 10.144 0.525 -0.567 1.00 -0.65 C

HETATM 73 C MOL A 1 10.458 -3.360 0.126 1.00 -0.45 C

HETATM 74 C MOL A 1 11.023 -0.828 1.581 1.00 -0.64 C

HETATM 75 C MOL A 1 11.064 2.866 5.274 1.00 -0.59 C

HETATM 76 C MOL A 1 11.130 4.767 0.970 1.00 -0.65 C

HETATM 77 C MOL A 1 12.494 0.010 -2.540 1.00 -0.73 C

HETATM 78 C MOL A 1 12.537 -1.931 -2.620 1.00 -0.67 C

HETATM 79 C MOL A 1 12.551 2.525 3.501 1.00 -0.62 C

HETATM 80 C MOL A 1 12.707 -0.487 -0.309 1.00 -0.65 C

HETATM 81 C MOL A 1 12.829 5.172 -0.723 1.00 -0.63 C

HETATM 82 C MOL A 1 12.867 3.717 -4.277 1.00 -0.62 C

HETATM 83 C MOL A 1 14.231 2.621 1.694 1.00 -0.59 C

HETATM 84 C MOL A 1 14.767 0.051 -1.987 1.00 -0.59 C

HETATM 85 C MOL A 1 15.071 3.770 -3.561 1.00 -0.54 C

HETATM 86 C MOL A 1 15.855 3.145 0.229 1.00 -0.50 C

HETATM 1 O MOL A 1 -12.707 4.739 -3.335 1.00 -2.40 O

HETATM 2 O MOL A 1 -10.811 2.577 0.389 1.00 -4.63 O

HETATM 3 O MOL A 1 -10.478 5.526 -3.798 1.00 -2.35 O

HETATM 4 O MOL A 1 -9.520 5.926 -1.743 1.00 -2.58 O

HETATM 5 O MOL A 1 -9.303 1.317 -2.006 1.00 -4.59 O

HETATM 6 O MOL A 1 -9.301 3.780 -4.618 1.00 -2.60 O

HETATM 7 O MOL A 1 -8.689 -1.065 5.297 1.00 -2.56 O

HETATM 8 O MOL A 1 -8.721 -0.889 5.327 1.00 -2.56 O

HETATM 9 O MOL A 1 -8.539 -3.163 2.420 1.00 -2.33 O

HETATM 10 O MOL A 1 -7.980 0.608 4.566 1.00 -2.68 O

HETATM 11 O MOL A 1 -7.532 -0.242 -1.724 1.00 -4.63 O

HETATM 12 O MOL A 1 -7.415 4.022 -3.838 1.00 -2.66 O

HETATM 13 O MOL A 1 -6.642 0.552 -0.458 1.00 -4.56 O

HETATM 14 O MOL A 1 -5.306 -3.178 5.016 1.00 -2.04 O

HETATM 15 O MOL A 1 -5.338 5.824 -1.832 1.00 -2.38 O

HETATM 16 O MOL A 1 -5.099 -4.494 0.152 1.00 -2.01 O

HETATM 17 O MOL A 1 -5.022 -4.585 -1.667 1.00 -2.06 O

HETATM 18 O MOL A 1 -4.680 0.467 3.651 1.00 -2.33 O

HETATM 19 O MOL A 1 -3.702 -4.596 -0.460 1.00 -2.00 O

HETATM 20 O MOL A 1 -2.714 0.114 3.327 1.00 -2.34 O

HETATM 21 O MOL A 1 -2.545 -0.308 -3.633 1.00 -3.22 O

HETATM 22 O MOL A 1 -0.551 -4.631 -0.951 1.00 -1.94 O

HETATM 23 O MOL A 1 -0.424 0.020 3.565 1.00 -2.58 O

HETATM 24 O MOL A 1 -0.164 3.863 -2.422 1.00 -1.69 O

HETATM 25 O MOL A 1 0.226 -0.355 0.552 1.00 -2.08 O

HETATM 26 O MOL A 1 1.564 1.795 -2.157 1.00 -1.73 O

HETATM 27 O MOL A 1 1.823 -4.551 -1.746 1.00 -1.93 O

HETATM 28 O MOL A 1 2.231 -4.126 0.564 1.00 -1.89 O

HETATM 29 O MOL A 1 2.240 -0.632 -2.046 1.00 -1.80 O

HETATM 30 O MOL A 1 2.169 0.053 1.062 1.00 -2.13 O

HETATM 31 O MOL A 1 2.601 -3.700 2.137 1.00 -1.91 O

HETATM 32 O MOL A 1 4.036 -2.649 -4.855 1.00 -2.23 O

HETATM 33 O MOL A 1 5.753 3.149 5.043 1.00 -1.18 O

HETATM 34 O MOL A 1 6.169 2.514 -0.359 1.00 -1.32 O

HETATM 35 O MOL A 1 6.415 -0.128 -1.199 1.00 -1.80 O

HETATM 36 O MOL A 1 6.581 -3.920 -0.640 1.00 -1.77 O

HETATM 37 O MOL A 1 6.671 -0.333 -2.771 1.00 -1.80 O

HETATM 38 O MOL A 1 6.886 -4.178 -2.151 1.00 -1.77 O

HETATM 39 O MOL A 1 7.284 0.572 3.889 1.00 -1.01 O

HETATM 40 O MOL A 1 7.697 -1.059 1.353 1.00 -0.85 O

HETATM 41 O MOL A 1 7.945 0.137 4.533 1.00 -1.03 O

HETATM 42 O MOL A 1 8.830 3.178 5.090 1.00 -1.00 O

HETATM 43 O MOL A 1 9.284 -2.550 -5.634 1.00 -2.76 O

HETATM 44 O MOL A 1 9.262 -0.607 1.662 1.00 -0.91 O

HETATM 45 O MOL A 1 9.399 3.387 0.117 1.00 -1.02 O

HETATM 46 O MOL A 1 10.003 -2.486 -5.467 1.00 -2.77 O

HETATM 47 O MOL A 1 10.631 1.482 -3.572 1.00 -1.20 O

HETATM 48 O MOL A 1 10.884 0.242 0.189 1.00 -0.77 O

HETATM 49 O MOL A 1 11.266 0.808 4.247 1.00 -0.97 O

HETATM 50 O MOL A 1 12.578 0.650 2.205 1.00 -0.96 O

HETATM 51 O MOL A 1 12.974 0.370 -1.747 1.00 -0.79 O

HETATM 52 O MOL A 1 14.131 0.833 0.389 1.00 -0.93 O

HETATM 53 O MOL A 1 15.060 4.303 -1.466 1.00 -0.86 O

END

**Table SS 21**. Hopane with WS-biochar of local minima and maxima on the Electrostatic potentials (ESP) surface.

REMARK Unit of B-factor field (i.e. ESP) is eV

REMARK Carbon: Surface maximum Oxygen: surface minimum

HETATM 1 C MOL A 1 -15.924 2.260 -2.823 1.00 -0.64 C

HETATM 2 C MOL A 1 -14.191 -1.044 -3.096 1.00 -0.40 C

HETATM 3 C MOL A 1 -12.741 1.695 -4.730 1.00 -0.42 C

HETATM 4 C MOL A 1 -12.405 -0.430 -4.240 1.00 -0.35 C

HETATM 5 C MOL A 1 -11.167 2.320 1.937 1.00 -1.07 C

HETATM 6 C MOL A 1 -10.870 -1.098 -0.124 1.00 -1.64 C

HETATM 7 C MOL A 1 -9.464 1.640 -1.788 1.00 -1.69 C

HETATM 8 C MOL A 1 -9.368 -1.201 1.033 1.00 -1.35 C

HETATM 9 C MOL A 1 -9.096 4.716 -0.758 1.00 -1.27 C

HETATM 10 C MOL A 1 -8.872 -2.049 -3.941 1.00 -0.39 C

HETATM 11 C MOL A 1 -7.906 1.532 -0.512 1.00 -1.46 C

HETATM 12 C MOL A 1 -7.427 6.177 2.300 1.00 -1.18 C

HETATM 13 C MOL A 1 -7.308 -2.317 0.990 1.00 -1.70 C

HETATM 14 C MOL A 1 -7.251 2.486 2.533 1.00 -1.48 C

HETATM 15 C MOL A 1 -6.357 0.422 3.927 1.00 -0.84 C

HETATM 16 C MOL A 1 -6.188 -3.816 -0.694 1.00 -1.74 C

HETATM 17 C MOL A 1 -6.063 2.576 -1.848 1.00 -1.45 C

HETATM 18 C MOL A 1 -5.976 -3.684 -4.956 1.00 -0.71 C

HETATM 19 C MOL A 1 -5.932 6.270 -1.312 1.00 -1.24 C

HETATM 20 C MOL A 1 -5.835 0.349 -0.594 1.00 -1.83 C

HETATM 21 C MOL A 1 -5.054 -3.312 1.396 1.00 -1.65 C

HETATM 22 C MOL A 1 -4.831 6.180 2.254 1.00 -1.32 C

HETATM 23 C MOL A 1 -4.734 -0.929 -1.940 1.00 -1.90 C

HETATM 24 C MOL A 1 -4.126 -2.151 5.673 1.00 -0.88 C

HETATM 25 C MOL A 1 -3.539 -6.642 -0.913 1.00 -1.00 C

HETATM 26 C MOL A 1 -3.535 6.078 -1.299 1.00 -1.32 C

HETATM 27 C MOL A 1 -3.245 4.781 -2.595 1.00 -1.39 C

HETATM 28 C MOL A 1 -2.754 -4.208 1.863 1.00 -1.65 C

HETATM 29 C MOL A 1 -2.792 -1.928 -1.709 1.00 -1.85 C

HETATM 30 C MOL A 1 -2.188 0.881 1.032 1.00 -0.11 C

HETATM 31 C MOL A 1 -2.117 6.256 2.164 1.00 -1.35 C

HETATM 32 C MOL A 1 -1.993 0.597 5.868 1.00 -1.00 C

HETATM 33 C MOL A 1 -1.705 -2.504 -1.794 1.00 -1.90 C

HETATM 34 C MOL A 1 -1.393 7.090 -0.200 1.00 -1.38 C

HETATM 35 C MOL A 1 -1.071 -5.749 -4.400 1.00 -0.84 C

HETATM 36 C MOL A 1 -1.053 -3.603 3.768 1.00 -1.80 C

HETATM 37 C MOL A 1 -0.351 -0.112 6.012 1.00 -0.90 C

HETATM 38 C MOL A 1 -0.378 6.421 -3.693 1.00 -1.25 C

HETATM 39 C MOL A 1 -0.216 -5.003 1.943 1.00 -1.74 C

HETATM 40 C MOL A 1 -0.140 2.637 -3.467 1.00 -1.48 C

HETATM 41 C MOL A 1 0.273 -1.959 0.310 1.00 -2.04 C

HETATM 42 C MOL A 1 0.282 5.746 2.574 1.00 -1.42 C

HETATM 43 C MOL A 1 0.568 1.364 0.113 1.00 -1.74 C

HETATM 44 C MOL A 1 0.919 1.460 0.918 1.00 -1.74 C

HETATM 45 C MOL A 1 1.067 -2.911 -1.470 1.00 -2.11 C

HETATM 46 C MOL A 1 1.225 -4.058 3.848 1.00 -1.68 C

HETATM 47 C MOL A 1 1.311 6.860 -2.574 1.00 -1.41 C

HETATM 48 C MOL A 1 1.469 -1.233 1.792 1.00 -1.99 C

HETATM 49 C MOL A 1 1.478 8.458 0.129 1.00 -1.27 C

HETATM 50 C MOL A 1 2.661 0.275 -3.132 1.00 -1.97 C

HETATM 51 C MOL A 1 3.141 5.678 -2.431 1.00 -1.60 C

HETATM 52 C MOL A 1 3.381 -5.998 -4.073 1.00 0.74 C

HETATM 53 C MOL A 1 3.621 3.213 3.709 1.00 -1.87 C

HETATM 54 C MOL A 1 3.630 6.398 3.062 1.00 -1.49 C

HETATM 55 C MOL A 1 4.068 3.359 -3.882 1.00 -1.69 C

HETATM 56 C MOL A 1 4.389 7.086 -0.667 1.00 -1.48 C

HETATM 57 C MOL A 1 4.654 -2.898 4.819 1.00 -2.15 C

HETATM 58 C MOL A 1 4.749 3.297 -4.138 1.00 -1.68 C

HETATM 59 C MOL A 1 4.887 0.511 -4.154 1.00 -2.01 C

HETATM 60 C MOL A 1 5.506 -5.357 0.283 1.00 -2.15 C

HETATM 61 C MOL A 1 5.685 5.770 2.290 1.00 -1.74 C

HETATM 62 C MOL A 1 6.229 -5.051 2.977 1.00 -1.84 C

HETATM 63 C MOL A 1 6.564 5.293 -1.692 1.00 -1.70 C

HETATM 64 C MOL A 1 7.441 -1.858 -3.921 1.00 -2.03 C

HETATM 65 C MOL A 1 7.479 5.146 -0.637 1.00 -1.83 C

HETATM 66 C MOL A 1 8.367 2.809 -3.684 1.00 -1.80 C

HETATM 67 C MOL A 1 8.505 3.673 2.565 1.00 -1.97 C

HETATM 68 C MOL A 1 8.657 -3.312 -3.620 1.00 -1.83 C

HETATM 69 C MOL A 1 8.877 4.232 -2.233 1.00 -1.87 C

HETATM 70 C MOL A 1 9.227 3.034 2.484 1.00 -2.01 C

HETATM 71 C MOL A 1 9.493 -4.005 -0.826 1.00 -2.17 C

HETATM 72 C MOL A 1 9.877 -0.054 -4.845 1.00 -1.65 C

HETATM 73 C MOL A 1 9.867 1.688 -4.267 1.00 -1.69 C

HETATM 74 C MOL A 1 10.892 3.673 0.503 1.00 -1.82 C

HETATM 75 C MOL A 1 11.139 -1.167 1.620 1.00 -2.07 C

HETATM 76 C MOL A 1 12.062 -2.474 -3.376 1.00 -1.57 C

HETATM 77 C MOL A 1 12.383 -2.911 -0.836 1.00 -1.70 C

HETATM 78 C MOL A 1 12.403 0.653 0.562 1.00 -1.78 C

HETATM 79 C MOL A 1 12.388 3.269 -2.191 1.00 -1.53 C

HETATM 80 C MOL A 1 12.973 -0.228 -2.776 1.00 -1.60 C

HETATM 1 O MOL A 1 -14.245 3.354 0.510 1.00 -2.73 O

HETATM 2 O MOL A 1 -13.608 3.291 0.914 1.00 -2.73 O

HETATM 3 O MOL A 1 -11.650 -0.650 0.355 1.00 -1.71 O

HETATM 4 O MOL A 1 -11.008 -1.645 -0.829 1.00 -1.72 O

HETATM 5 O MOL A 1 -9.863 2.424 -1.300 1.00 -1.78 O

HETATM 6 O MOL A 1 -9.342 1.355 -2.588 1.00 -1.77 O

HETATM 7 O MOL A 1 -8.858 1.749 2.407 1.00 -2.22 O

HETATM 8 O MOL A 1 -8.390 2.407 0.252 1.00 -1.91 O

HETATM 9 O MOL A 1 -8.217 2.330 0.205 1.00 -1.90 O

HETATM 10 O MOL A 1 -7.893 5.977 0.198 1.00 -1.55 O

HETATM 11 O MOL A 1 -7.024 -2.109 2.186 1.00 -1.84 O

HETATM 12 O MOL A 1 -6.883 -3.336 0.110 1.00 -1.82 O

HETATM 13 O MOL A 1 -6.801 -4.045 -1.391 1.00 -1.84 O

HETATM 14 O MOL A 1 -5.101 -0.839 -2.735 1.00 -2.01 O

HETATM 15 O MOL A 1 -4.921 1.436 1.273 1.00 -2.46 O

HETATM 16 O MOL A 1 -4.822 -3.106 2.489 1.00 -1.82 O

HETATM 17 O MOL A 1 -4.495 3.913 -1.638 1.00 -1.69 O

HETATM 18 O MOL A 1 -3.990 -0.904 -1.550 1.00 -1.95 O

HETATM 19 O MOL A 1 -3.857 2.546 3.513 1.00 -2.83 O

HETATM 20 O MOL A 1 -3.696 -4.340 1.467 1.00 -1.74 O

HETATM 21 O MOL A 1 -3.303 5.974 0.748 1.00 -1.57 O

HETATM 22 O MOL A 1 -2.505 6.097 0.355 1.00 -1.58 O

HETATM 23 O MOL A 1 -2.469 -2.796 -3.534 1.00 -2.51 O

HETATM 24 O MOL A 1 -1.950 6.191 -2.118 1.00 -1.62 O

HETATM 25 O MOL A 1 -1.796 -3.954 3.306 1.00 -1.85 O

HETATM 26 O MOL A 1 -1.773 2.730 -2.016 1.00 -1.79 O

HETATM 27 O MOL A 1 -0.726 -3.276 4.721 1.00 -1.90 O

HETATM 28 O MOL A 1 -0.329 -2.879 -2.582 1.00 -2.28 O

HETATM 29 O MOL A 1 -0.046 7.013 0.994 1.00 -1.67 O

HETATM 30 O MOL A 1 0.194 2.017 0.995 1.00 -1.87 O

HETATM 31 O MOL A 1 0.352 7.114 -0.915 1.00 -1.61 O

HETATM 32 O MOL A 1 0.542 -0.181 2.609 1.00 -2.14 O

HETATM 33 O MOL A 1 1.307 -6.805 -0.989 1.00 -2.03 O

HETATM 34 O MOL A 1 1.384 4.391 -2.780 1.00 -1.82 O

HETATM 35 O MOL A 1 1.693 -3.085 -2.348 1.00 -2.32 O

HETATM 36 O MOL A 1 2.587 3.677 -3.193 1.00 -1.84 O

HETATM 37 O MOL A 1 2.808 6.839 -0.983 1.00 -1.64 O

HETATM 38 O MOL A 1 3.274 -1.010 3.680 1.00 -3.13 O

HETATM 39 O MOL A 1 3.685 -5.925 1.230 1.00 -2.29 O

HETATM 40 O MOL A 1 4.059 1.208 -3.652 1.00 -2.16 O

HETATM 41 O MOL A 1 4.897 4.391 -2.561 1.00 -2.03 O

HETATM 42 O MOL A 1 4.987 -4.095 -1.767 1.00 -3.18 O

HETATM 43 O MOL A 1 6.301 -2.601 -1.238 1.00 -4.35 O

HETATM 44 O MOL A 1 6.296 5.240 0.346 1.00 -2.06 O

HETATM 45 O MOL A 1 6.441 0.019 3.730 1.00 -4.44 O

HETATM 46 O MOL A 1 6.465 1.296 -3.929 1.00 -2.30 O

HETATM 47 O MOL A 1 6.537 -0.057 -4.101 1.00 -2.32 O

HETATM 48 O MOL A 1 6.951 4.159 -3.616 1.00 -2.05 O

HETATM 49 O MOL A 1 7.890 -1.705 1.146 1.00 -4.12 O

HETATM 50 O MOL A 1 8.907 3.989 0.820 1.00 -2.28 O

HETATM 51 O MOL A 1 10.041 -3.462 -1.706 1.00 -2.26 O

HETATM 52 O MOL A 1 11.181 0.297 -3.581 1.00 -1.99 O

HETATM 53 O MOL A 1 11.809 -1.312 0.699 1.00 -2.18 O

HETATM 54 O MOL A 1 12.616 1.360 -1.002 1.00 -1.96 O

END

**Table SS 22**. Phenol with WS-biochar of local minima and maxima on the Electrostatic potentials (ESP) surface.

REMARK Unit of B-factor field (i.e. ESP) is eV

REMARK Carbon: Surface maximum Oxygen: surface minimum

HETATM 1 C MOL A 1 -13.343 3.396 2.702 1.00 -1.58 C

HETATM 2 C MOL A 1 -11.831 5.026 -0.272 1.00 -1.71 C

HETATM 3 C MOL A 1 -11.222 6.246 3.129 1.00 -1.56 C

HETATM 4 C MOL A 1 -10.043 2.964 4.527 1.00 -1.91 C

HETATM 5 C MOL A 1 -8.947 5.026 -0.499 1.00 -2.08 C

HETATM 6 C MOL A 1 -8.875 -4.267 0.071 1.00 -1.68 C

HETATM 7 C MOL A 1 -8.452 5.986 2.867 1.00 -1.91 C

HETATM 8 C MOL A 1 -8.376 -1.084 -3.806 1.00 -1.96 C

HETATM 9 C MOL A 1 -7.970 4.242 -3.323 1.00 -1.91 C

HETATM 10 C MOL A 1 -7.460 5.423 -1.062 1.00 -2.01 C

HETATM 11 C MOL A 1 -7.129 2.743 4.250 1.00 -2.14 C

HETATM 12 C MOL A 1 -6.170 -7.357 2.755 1.00 0.82 C

HETATM 13 C MOL A 1 -5.613 5.563 2.377 1.00 -2.08 C

HETATM 14 C MOL A 1 -5.621 6.812 -3.251 1.00 -1.52 C

HETATM 15 C MOL A 1 -5.205 4.073 -5.632 1.00 -1.51 C

HETATM 16 C MOL A 1 -4.645 -2.514 -3.886 1.00 -1.88 C

HETATM 17 C MOL A 1 -4.487 6.540 -1.029 1.00 -1.74 C

HETATM 18 C MOL A 1 -4.093 0.185 4.051 1.00 -1.69 C

HETATM 19 C MOL A 1 -3.775 -3.784 1.274 1.00 -2.19 C

HETATM 20 C MOL A 1 -3.781 -2.510 6.286 1.00 -1.35 C

HETATM 21 C MOL A 1 -3.766 -0.914 -0.785 1.00 -2.67 C

HETATM 22 C MOL A 1 -3.223 -0.289 5.964 1.00 -1.46 C

HETATM 23 C MOL A 1 -3.127 -4.339 -2.853 1.00 -1.89 C

HETATM 24 C MOL A 1 -2.925 -2.368 -0.013 1.00 -2.35 C

HETATM 25 C MOL A 1 -2.575 1.687 -4.741 1.00 -1.26 C

HETATM 26 C MOL A 1 -2.365 -0.858 -0.963 1.00 -2.59 C

HETATM 27 C MOL A 1 -2.258 -5.280 4.457 1.00 -1.37 C

HETATM 28 C MOL A 1 -2.249 -2.422 -4.099 1.00 -2.01 C

HETATM 29 C MOL A 1 -2.172 1.724 -0.441 1.00 -2.98 C

HETATM 30 C MOL A 1 -1.757 -7.799 2.305 1.00 -0.87 C

HETATM 31 C MOL A 1 -1.721 5.912 -2.305 1.00 -1.29 C

HETATM 32 C MOL A 1 -1.395 -3.717 1.157 1.00 -2.15 C

HETATM 33 C MOL A 1 -1.224 2.977 3.344 1.00 -2.56 C

HETATM 34 C MOL A 1 -0.904 -2.092 -0.129 1.00 -2.25 C

HETATM 35 C MOL A 1 -0.764 2.021 -4.690 1.00 -1.39 C

HETATM 36 C MOL A 1 -0.522 -3.984 -2.974 1.00 -1.81 C

HETATM 37 C MOL A 1 -0.193 -3.064 6.596 1.00 -1.25 C

HETATM 38 C MOL A 1 0.091 -7.444 -1.603 1.00 -1.07 C

HETATM 39 C MOL A 1 0.176 4.360 1.957 1.00 -2.28 C

HETATM 40 C MOL A 1 0.554 -0.469 5.762 1.00 -1.33 C

HETATM 41 C MOL A 1 0.673 -0.687 -5.871 1.00 -1.12 C

HETATM 42 C MOL A 1 1.081 -1.159 1.443 1.00 -1.99 C

HETATM 43 C MOL A 1 1.528 -2.201 4.599 1.00 -1.42 C

HETATM 44 C MOL A 1 1.526 5.788 0.607 1.00 -2.31 C

HETATM 45 C MOL A 1 1.955 -3.695 -2.675 1.00 -1.78 C

HETATM 46 C MOL A 1 2.414 0.583 3.971 1.00 -1.11 C

HETATM 47 C MOL A 1 2.678 -2.905 1.303 1.00 -2.05 C

HETATM 48 C MOL A 1 2.781 0.644 -0.345 1.00 -0.71 C

HETATM 49 C MOL A 1 3.209 -5.184 -1.237 1.00 -1.83 C

HETATM 50 C MOL A 1 3.606 -6.845 2.623 1.00 -0.77 C

HETATM 51 C MOL A 1 3.747 -1.278 0.288 1.00 -1.86 C

HETATM 52 C MOL A 1 3.708 7.105 -3.077 1.00 0.71 C

HETATM 53 C MOL A 1 3.936 0.768 -3.569 1.00 -0.97 C

HETATM 54 C MOL A 1 4.414 -3.280 -2.429 1.00 -1.79 C

HETATM 55 C MOL A 1 4.485 1.459 4.777 1.00 -1.14 C

HETATM 56 C MOL A 1 5.047 7.494 -1.895 1.00 -0.67 C

HETATM 57 C MOL A 1 6.241 -0.200 5.024 1.00 -1.06 C

HETATM 58 C MOL A 1 6.314 5.352 3.272 1.00 -1.09 C

HETATM 59 C MOL A 1 6.560 -2.583 -2.514 1.00 -1.42 C

HETATM 60 C MOL A 1 6.626 -5.367 1.754 1.00 -0.46 C

HETATM 61 C MOL A 1 6.786 4.874 -2.692 1.00 -0.92 C

HETATM 62 C MOL A 1 6.902 3.718 2.924 1.00 -1.08 C

HETATM 63 C MOL A 1 7.331 2.726 0.638 1.00 -1.16 C

HETATM 64 C MOL A 1 7.418 8.280 1.750 1.00 -0.91 C

HETATM 65 C MOL A 1 7.892 -1.669 2.861 1.00 -1.39 C

HETATM 66 C MOL A 1 8.207 -3.247 -1.754 1.00 -1.69 C

HETATM 67 C MOL A 1 8.235 3.290 -0.609 1.00 -1.07 C

HETATM 68 C MOL A 1 8.283 4.785 3.327 1.00 -0.91 C

HETATM 69 C MOL A 1 8.542 1.938 3.028 1.00 -1.08 C

HETATM 70 C MOL A 1 8.986 0.739 -2.255 1.00 -1.08 C

HETATM 71 C MOL A 1 9.131 7.851 -1.363 1.00 -0.77 C

HETATM 72 C MOL A 1 10.246 6.608 0.541 1.00 -0.82 C

HETATM 73 C MOL A 1 10.443 -4.651 1.760 1.00 -0.40 C

HETATM 74 C MOL A 1 11.305 -2.991 2.977 1.00 -0.47 C

HETATM 75 C MOL A 1 11.862 -4.976 0.163 1.00 -0.44 C

HETATM 76 C MOL A 1 14.244 -2.196 0.799 1.00 -0.68 C

HETATM 1 O MOL A 1 -10.552 -0.140 0.538 1.00 -4.47 O

HETATM 2 O MOL A 1 -9.409 5.580 0.957 1.00 -2.30 O

HETATM 3 O MOL A 1 -9.106 1.832 -0.400 1.00 -4.44 O

HETATM 4 O MOL A 1 -9.015 0.243 1.790 1.00 -4.51 O

HETATM 5 O MOL A 1 -8.443 -2.909 -2.773 1.00 -2.32 O

HETATM 6 O MOL A 1 -8.143 -5.691 0.558 1.00 -2.57 O

HETATM 7 O MOL A 1 -8.199 -5.594 0.730 1.00 -2.57 O

HETATM 8 O MOL A 1 -7.507 -4.451 1.896 1.00 -2.67 O

HETATM 9 O MOL A 1 -7.101 -4.167 -2.451 1.00 -2.34 O

HETATM 10 O MOL A 1 -7.118 5.250 0.952 1.00 -2.43 O

HETATM 11 O MOL A 1 -7.031 5.306 -1.939 1.00 -2.13 O

HETATM 12 O MOL A 1 -6.867 4.239 3.182 1.00 -2.42 O

HETATM 13 O MOL A 1 -5.174 0.611 -1.267 1.00 -4.56 O

HETATM 14 O MOL A 1 -4.576 -6.885 -0.794 1.00 -2.05 O

HETATM 15 O MOL A 1 -4.156 5.274 -4.040 1.00 -1.89 O

HETATM 16 O MOL A 1 -4.118 5.731 -2.301 1.00 -1.88 O

HETATM 17 O MOL A 1 -4.007 -4.173 1.994 1.00 -2.32 O

HETATM 18 O MOL A 1 -3.000 -3.155 -3.993 1.00 -2.05 O

HETATM 19 O MOL A 1 -2.914 4.622 1.661 1.00 -2.69 O

HETATM 20 O MOL A 1 -2.597 -1.649 -4.767 1.00 -2.11 O

HETATM 21 O MOL A 1 -2.180 -4.251 1.914 1.00 -2.34 O

HETATM 22 O MOL A 1 -2.077 3.074 3.449 1.00 -2.60 O

HETATM 23 O MOL A 1 -1.777 -1.393 6.215 1.00 -1.69 O

HETATM 24 O MOL A 1 -1.563 -2.841 -4.051 1.00 -2.05 O

HETATM 25 O MOL A 1 -0.680 -2.645 0.667 1.00 -2.36 O

HETATM 26 O MOL A 1 -0.445 1.386 -1.028 1.00 -3.71 O

HETATM 27 O MOL A 1 0.282 5.991 0.645 1.00 -2.43 O

HETATM 28 O MOL A 1 0.335 -5.299 2.598 1.00 -2.58 O

HETATM 29 O MOL A 1 0.345 6.691 -3.731 1.00 -2.64 O

HETATM 30 O MOL A 1 0.358 -1.956 5.165 1.00 -1.55 O

HETATM 31 O MOL A 1 0.988 -2.752 1.274 1.00 -2.23 O

HETATM 32 O MOL A 1 1.536 -2.923 -3.597 1.00 -1.99 O

HETATM 33 O MOL A 1 1.959 4.098 2.791 1.00 -2.42 O

HETATM 34 O MOL A 1 1.939 5.974 0.633 1.00 -2.33 O

HETATM 35 O MOL A 1 2.794 -3.334 1.981 1.00 -2.13 O

HETATM 36 O MOL A 1 3.604 -4.438 -2.071 1.00 -1.91 O

HETATM 37 O MOL A 1 3.823 -5.696 -0.903 1.00 -1.93 O

HETATM 38 O MOL A 1 3.850 1.797 -0.298 1.00 -2.11 O

HETATM 39 O MOL A 1 3.884 -2.555 -3.370 1.00 -1.96 O

HETATM 40 O MOL A 1 4.003 -0.249 -0.032 1.00 -1.96 O

HETATM 41 O MOL A 1 6.524 0.739 -2.411 1.00 -2.25 O

HETATM 42 O MOL A 1 6.680 1.766 4.017 1.00 -1.43 O

HETATM 43 O MOL A 1 6.705 4.393 2.786 1.00 -1.14 O

HETATM 44 O MOL A 1 7.159 8.480 -0.511 1.00 -1.13 O

HETATM 45 O MOL A 1 8.109 -2.204 2.193 1.00 -1.66 O

HETATM 46 O MOL A 1 8.314 -4.012 -1.395 1.00 -1.77 O

HETATM 47 O MOL A 1 8.525 -0.294 0.875 1.00 -1.82 O

HETATM 48 O MOL A 1 9.004 -2.791 -2.178 1.00 -1.77 O

HETATM 49 O MOL A 1 9.162 3.570 1.415 1.00 -1.35 O

HETATM 50 O MOL A 1 12.504 0.436 -1.337 1.00 -2.77 O

END

**Table SS 23**. Pyrrole with WS-biochar of local minima and maxima on the Electrostatic potentials (ESP) surface.

REMARK Unit of B-factor field (i.e. ESP) is eV

REMARK Carbon: Surface maximum Oxygen: surface minimum

HETATM 1 C MOL A 1 -11.156 6.785 1.945 1.00 -1.79 C

HETATM 2 C MOL A 1 -10.720 6.075 5.576 1.00 -1.63 C

HETATM 3 C MOL A 1 -9.844 7.116 0.491 1.00 -1.89 C

HETATM 4 C MOL A 1 -9.791 -6.898 1.183 1.00 -1.03 C

HETATM 5 C MOL A 1 -9.685 -2.106 -0.934 1.00 -1.59 C

HETATM 6 C MOL A 1 -9.611 2.668 -2.380 1.00 -2.02 C

HETATM 7 C MOL A 1 -8.639 8.466 3.905 1.00 -1.60 C

HETATM 8 C MOL A 1 -8.620 -8.992 1.451 1.00 -0.87 C

HETATM 9 C MOL A 1 -7.621 -5.123 3.890 1.00 -1.23 C

HETATM 10 C MOL A 1 -7.155 5.433 5.398 1.00 -1.95 C

HETATM 11 C MOL A 1 -6.898 -6.067 -2.051 1.00 0.62 C

HETATM 12 C MOL A 1 -6.913 6.067 -1.181 1.00 -1.96 C

HETATM 13 C MOL A 1 -6.438 -7.428 4.274 1.00 -1.01 C

HETATM 14 C MOL A 1 -6.436 7.641 2.305 1.00 -1.89 C

HETATM 15 C MOL A 1 -6.322 2.036 -4.095 1.00 -1.78 C

HETATM 16 C MOL A 1 -5.115 -2.144 4.611 1.00 -1.78 C

HETATM 17 C MOL A 1 -5.013 5.241 4.019 1.00 -2.07 C

HETATM 18 C MOL A 1 -4.880 -9.132 1.077 1.00 -0.90 C

HETATM 19 C MOL A 1 -4.854 -0.049 -4.863 1.00 -1.81 C

HETATM 20 C MOL A 1 -4.742 1.245 -1.000 1.00 -2.54 C

HETATM 21 C MOL A 1 -4.586 -2.171 -1.242 1.00 -2.20 C

HETATM 22 C MOL A 1 -4.540 -7.140 3.738 1.00 -1.12 C

HETATM 23 C MOL A 1 -4.432 -7.245 -0.291 1.00 -1.11 C

HETATM 24 C MOL A 1 -4.431 -1.932 -0.700 1.00 -2.19 C

HETATM 25 C MOL A 1 -3.963 2.341 -4.753 1.00 -1.91 C

HETATM 26 C MOL A 1 -3.904 -0.279 -1.540 1.00 -2.30 C

HETATM 27 C MOL A 1 -3.825 5.803 -2.382 1.00 -1.05 C

HETATM 28 C MOL A 1 -3.184 1.541 -1.442 1.00 -2.44 C

HETATM 29 C MOL A 1 -3.081 7.368 2.484 1.00 -1.42 C

HETATM 30 C MOL A 1 -2.837 -7.478 2.562 1.00 -1.06 C

HETATM 31 C MOL A 1 -2.767 -5.904 -3.558 1.00 -0.93 C

HETATM 32 C MOL A 1 -2.562 -7.429 4.355 1.00 -1.11 C

HETATM 33 C MOL A 1 -2.453 4.717 -1.253 1.00 -1.73 C

HETATM 34 C MOL A 1 -2.181 0.514 -5.273 1.00 -1.75 C

HETATM 35 C MOL A 1 -2.136 6.162 -2.448 1.00 -1.13 C

HETATM 36 C MOL A 1 -1.919 8.134 -1.780 1.00 -1.16 C

HETATM 37 C MOL A 1 -1.973 9.174 2.153 1.00 -1.14 C

HETATM 38 C MOL A 1 -1.808 -2.966 -6.640 1.00 -1.08 C

HETATM 39 C MOL A 1 -1.838 0.197 -1.849 1.00 -2.18 C

HETATM 40 C MOL A 1 -1.501 -2.184 -2.134 1.00 -2.16 C

HETATM 41 C MOL A 1 -1.371 -7.913 0.700 1.00 -1.12 C

HETATM 42 C MOL A 1 -1.180 4.872 -5.534 1.00 -1.01 C

HETATM 43 C MOL A 1 -1.076 1.976 -0.849 1.00 -0.92 C

HETATM 44 C MOL A 1 -0.798 -1.711 0.392 1.00 -2.50 C

HETATM 45 C MOL A 1 -0.855 -1.702 3.815 1.00 -2.38 C

HETATM 46 C MOL A 1 -0.544 -1.863 -2.140 1.00 -2.13 C

HETATM 47 C MOL A 1 -0.438 -10.007 3.138 1.00 -0.87 C

HETATM 48 C MOL A 1 -0.004 6.069 3.100 1.00 -1.01 C

HETATM 49 C MOL A 1 0.246 0.201 -1.891 1.00 -2.14 C

HETATM 50 C MOL A 1 0.321 0.673 -5.271 1.00 -1.76 C

HETATM 51 C MOL A 1 0.426 -0.019 4.089 1.00 -2.39 C

HETATM 52 C MOL A 1 0.797 6.274 5.072 1.00 0.50 C

HETATM 53 C MOL A 1 1.201 -5.735 -0.618 1.00 -1.34 C

HETATM 54 C MOL A 1 1.181 8.766 0.554 1.00 -1.14 C

HETATM 55 C MOL A 1 1.264 4.935 -4.279 1.00 -1.03 C

HETATM 56 C MOL A 1 1.461 -7.488 5.275 1.00 -0.97 C

HETATM 57 C MOL A 1 1.583 -1.474 0.311 1.00 -2.54 C

HETATM 58 C MOL A 1 1.667 -1.471 -1.982 1.00 -2.21 C

HETATM 59 C MOL A 1 1.749 -1.328 -5.423 1.00 -1.83 C

HETATM 60 C MOL A 1 1.856 -2.161 3.694 1.00 -2.38 C

HETATM 61 C MOL A 1 2.103 3.011 1.674 1.00 -2.48 C

HETATM 62 C MOL A 1 2.238 4.580 -3.473 1.00 -1.05 C

HETATM 63 C MOL A 1 2.312 -7.815 1.675 1.00 -0.98 C

HETATM 64 C MOL A 1 2.543 -5.162 -3.844 1.00 -0.82 C

HETATM 65 C MOL A 1 2.763 0.428 -1.767 1.00 -2.18 C

HETATM 66 C MOL A 1 2.862 0.990 -5.147 1.00 -1.80 C

HETATM 67 C MOL A 1 2.956 -0.326 4.134 1.00 -2.37 C

HETATM 68 C MOL A 1 3.002 0.673 0.846 1.00 -2.53 C

HETATM 69 C MOL A 1 3.256 -6.229 1.676 1.00 -1.01 C

HETATM 70 C MOL A 1 3.972 -5.441 3.903 1.00 -1.15 C

HETATM 71 C MOL A 1 4.116 6.859 5.709 1.00 -0.42 C

HETATM 72 C MOL A 1 5.068 -6.949 0.952 1.00 -0.93 C

HETATM 73 C MOL A 1 5.071 1.619 -5.013 1.00 -1.45 C

HETATM 74 C MOL A 1 5.089 1.072 -1.582 1.00 -1.65 C

HETATM 75 C MOL A 1 5.556 -6.640 4.860 1.00 -0.88 C

HETATM 76 C MOL A 1 5.545 -3.320 -4.047 1.00 -0.50 C

HETATM 77 C MOL A 1 6.194 -4.443 -1.141 1.00 -1.00 C

HETATM 78 C MOL A 1 6.582 3.687 4.367 1.00 -0.92 C

HETATM 79 C MOL A 1 6.647 -2.190 3.089 1.00 -1.12 C

HETATM 80 C MOL A 1 6.636 1.988 5.008 1.00 -1.10 C

HETATM 81 C MOL A 1 6.841 0.117 -1.715 1.00 -1.80 C

HETATM 82 C MOL A 1 6.751 0.752 -5.149 1.00 -1.71 C

HETATM 83 C MOL A 1 7.390 -1.622 3.426 1.00 -1.06 C

HETATM 84 C MOL A 1 7.723 3.955 -2.913 1.00 -1.13 C

HETATM 85 C MOL A 1 7.737 -4.293 0.324 1.00 -0.96 C

HETATM 86 C MOL A 1 8.116 3.632 1.530 1.00 -1.19 C

HETATM 87 C MOL A 1 8.217 -3.655 4.252 1.00 -0.89 C

HETATM 88 C MOL A 1 8.538 -7.027 2.468 1.00 -0.77 C

HETATM 89 C MOL A 1 8.795 1.860 4.763 1.00 -0.99 C

HETATM 90 C MOL A 1 9.290 -2.664 -3.962 1.00 -0.43 C

HETATM 91 C MOL A 1 9.912 -1.465 3.180 1.00 -0.95 C

HETATM 92 C MOL A 1 10.410 -2.326 -2.286 1.00 -0.49 C

HETATM 93 C MOL A 1 10.423 -1.539 -5.681 1.00 -0.49 C

HETATM 94 C MOL A 1 10.713 3.679 0.956 1.00 -1.17 C

HETATM 95 C MOL A 1 11.242 2.148 4.214 1.00 -0.91 C

HETATM 96 C MOL A 1 12.556 -1.155 3.030 1.00 -0.88 C

HETATM 97 C MOL A 1 13.095 0.037 -3.727 1.00 -0.71 C

HETATM 98 C MOL A 1 13.282 2.512 4.005 1.00 -0.81 C

HETATM 99 C MOL A 1 13.579 3.689 0.409 1.00 -0.97 C

HETATM 100 C MOL A 1 14.072 -0.824 -0.704 1.00 -0.76 C

HETATM 101 C MOL A 1 14.945 -0.882 3.103 1.00 -0.68 C

HETATM 102 C MOL A 1 15.124 -0.002 -0.668 1.00 -0.70 C

HETATM 103 C MOL A 1 16.443 2.505 2.076 1.00 -0.65 C

HETATM 1 O MOL A 1 -9.071 -3.541 -2.072 1.00 -2.53 O

HETATM 2 O MOL A 1 -8.637 -0.352 -3.403 1.00 -2.30 O

HETATM 3 O MOL A 1 -8.403 7.259 1.677 1.00 -2.27 O

HETATM 4 O MOL A 1 -8.014 -3.335 1.873 1.00 -1.93 O

HETATM 5 O MOL A 1 -7.936 1.632 2.705 1.00 -4.91 O

HETATM 6 O MOL A 1 -7.636 -2.983 -0.261 1.00 -2.42 O

HETATM 7 O MOL A 1 -7.499 7.062 0.483 1.00 -2.31 O

HETATM 8 O MOL A 1 -6.988 -0.607 0.719 1.00 -3.99 O

HETATM 9 O MOL A 1 -6.989 2.823 -0.230 1.00 -3.60 O

HETATM 10 O MOL A 1 -6.792 -9.090 0.514 1.00 -1.20 O

HETATM 11 O MOL A 1 -6.251 5.997 3.661 1.00 -2.27 O

HETATM 12 O MOL A 1 -6.067 -3.455 -4.555 1.00 -2.03 O

HETATM 13 O MOL A 1 -5.862 0.198 -0.156 1.00 -3.78 O

HETATM 14 O MOL A 1 -5.218 -7.469 -0.039 1.00 -1.16 O

HETATM 15 O MOL A 1 -4.890 -7.884 2.893 1.00 -1.30 O

HETATM 16 O MOL A 1 -4.725 1.565 -5.039 1.00 -1.97 O

HETATM 17 O MOL A 1 -4.530 -3.617 -5.076 1.00 -1.92 O

HETATM 18 O MOL A 1 -4.423 3.309 -4.650 1.00 -2.01 O

HETATM 19 O MOL A 1 -3.418 2.249 -0.652 1.00 -2.90 O

HETATM 20 O MOL A 1 -3.295 1.864 -5.196 1.00 -1.96 O

HETATM 21 O MOL A 1 -3.117 -0.995 -1.585 1.00 -2.39 O

HETATM 22 O MOL A 1 -2.713 -3.096 -1.540 1.00 -2.57 O

HETATM 23 O MOL A 1 -2.282 -2.965 0.189 1.00 -2.69 O

HETATM 24 O MOL A 1 -2.081 -8.541 3.407 1.00 -1.29 O

HETATM 25 O MOL A 1 -2.075 -2.826 4.032 1.00 -2.51 O

HETATM 26 O MOL A 1 -1.981 -0.454 -0.023 1.00 -2.73 O

HETATM 27 O MOL A 1 -1.494 -0.905 -1.804 1.00 -2.38 O

HETATM 28 O MOL A 1 -1.329 0.213 -5.605 1.00 -1.83 O

HETATM 29 O MOL A 1 -1.425 4.403 -0.788 1.00 -2.14 O

HETATM 30 O MOL A 1 -0.696 -3.604 -2.026 1.00 -2.73 O

HETATM 31 O MOL A 1 -0.072 1.709 -5.385 1.00 -1.92 O

HETATM 32 O MOL A 1 -0.083 8.053 2.147 1.00 -1.44 O

HETATM 33 O MOL A 1 0.418 -1.375 0.190 1.00 -2.63 O

HETATM 34 O MOL A 1 0.485 1.156 4.702 1.00 -2.49 O

HETATM 35 O MOL A 1 0.630 -1.553 4.122 1.00 -2.47 O

HETATM 36 O MOL A 1 0.862 -0.841 -1.762 1.00 -2.35 O

HETATM 37 O MOL A 1 1.309 -8.737 3.756 1.00 -1.25 O

HETATM 38 O MOL A 1 1.496 -0.366 -1.684 1.00 -2.35 O

HETATM 39 O MOL A 1 1.626 0.074 4.452 1.00 -2.46 O

HETATM 40 O MOL A 1 1.773 3.463 -0.684 1.00 -3.21 O

HETATM 41 O MOL A 1 1.931 -2.168 -1.789 1.00 -2.29 O

HETATM 42 O MOL A 1 2.004 -0.106 0.346 1.00 -2.62 O

HETATM 43 O MOL A 1 2.125 -0.208 -5.582 1.00 -1.92 O

HETATM 44 O MOL A 1 2.226 1.711 0.876 1.00 -2.64 O

HETATM 45 O MOL A 1 2.293 -2.032 -5.648 1.00 -1.92 O

HETATM 46 O MOL A 1 2.367 2.015 -5.259 1.00 -1.95 O

HETATM 47 O MOL A 1 3.416 -0.660 4.165 1.00 -2.40 O

HETATM 48 O MOL A 1 3.537 0.556 0.642 1.00 -2.58 O

HETATM 49 O MOL A 1 4.108 -5.763 2.704 1.00 -1.21 O

HETATM 50 O MOL A 1 5.097 3.558 -1.950 1.00 -2.40 O

HETATM 51 O MOL A 1 5.789 -5.283 -0.085 1.00 -1.24 O

HETATM 52 O MOL A 1 6.223 -7.236 2.957 1.00 -1.17 O

HETATM 53 O MOL A 1 6.840 -0.041 -5.450 1.00 -1.79 O

HETATM 54 O MOL A 1 7.151 0.915 -1.332 1.00 -1.86 O

HETATM 55 O MOL A 1 7.401 1.401 -5.211 1.00 -1.77 O

HETATM 56 O MOL A 1 7.624 -1.072 1.278 1.00 -1.41 O

HETATM 57 O MOL A 1 7.867 3.212 3.178 1.00 -1.36 O

HETATM 58 O MOL A 1 8.508 -4.639 2.459 1.00 -1.19 O

HETATM 59 O MOL A 1 9.117 3.100 2.830 1.00 -1.36 O

HETATM 60 O MOL A 1 10.282 3.570 -2.494 1.00 -2.77 O

HETATM 61 O MOL A 1 12.190 -1.629 0.685 1.00 -1.17 O

HETATM 62 O MOL A 1 14.999 1.282 3.417 1.00 -1.02 O

HETATM 63 O MOL A 1 16.217 0.038 1.288 1.00 -1.02 O

END

**Table SS 24**. Thioisorenieratane with WS-biochar of local minima and maxima on the Electrostatic potentials (ESP) surface.

REMARK Unit of B-factor field (i.e. ESP) is eV

REMARK Carbon: Surface maximum Oxygen: surface minimum

HETATM 1 C MOL A 1 -10.146 3.032 -3.243 1.00 -1.93 C

HETATM 2 C MOL A 1 -9.850 0.434 -2.326 1.00 -2.21 C

HETATM 3 C MOL A 1 -9.186 -3.634 4.933 1.00 -1.24 C

HETATM 4 C MOL A 1 -8.754 -4.084 -0.674 1.00 0.66 C

HETATM 5 C MOL A 1 -8.453 1.215 5.505 1.00 -2.00 C

HETATM 6 C MOL A 1 -7.650 5.019 -3.373 1.00 -2.18 C

HETATM 7 C MOL A 1 -7.300 -0.573 6.653 1.00 -1.49 C

HETATM 8 C MOL A 1 -7.119 -3.787 8.008 1.00 -1.09 C

HETATM 9 C MOL A 1 -6.883 -2.950 1.051 1.00 -1.64 C

HETATM 10 C MOL A 1 -5.768 -4.029 0.413 1.00 -1.46 C

HETATM 11 C MOL A 1 -5.766 2.639 5.022 1.00 -2.15 C

HETATM 12 C MOL A 1 -5.479 -5.022 7.884 1.00 -1.05 C

HETATM 13 C MOL A 1 -5.190 -1.236 -0.766 1.00 -2.21 C

HETATM 14 C MOL A 1 -5.094 2.258 -4.873 1.00 -1.77 C

HETATM 15 C MOL A 1 -4.764 -5.815 -1.562 1.00 -0.93 C

HETATM 16 C MOL A 1 -4.424 -0.303 -4.775 1.00 -1.82 C

HETATM 17 C MOL A 1 -4.402 1.135 -0.213 1.00 -2.36 C

HETATM 18 C MOL A 1 -4.306 2.180 -1.459 1.00 -2.17 C

HETATM 19 C MOL A 1 -3.929 6.772 -1.009 1.00 -1.99 C

HETATM 20 C MOL A 1 -3.855 0.258 -1.415 1.00 -2.21 C

HETATM 21 C MOL A 1 -3.832 4.870 3.837 1.00 -2.02 C

HETATM 22 C MOL A 1 -3.331 -0.493 1.752 1.00 -1.88 C

HETATM 23 C MOL A 1 -2.879 1.705 -1.616 1.00 -2.27 C

HETATM 24 C MOL A 1 -2.805 1.619 -5.121 1.00 -1.90 C

HETATM 25 C MOL A 1 -2.675 -6.337 1.201 1.00 -1.25 C

HETATM 26 C MOL A 1 -2.621 7.044 2.486 1.00 -1.68 C

HETATM 27 C MOL A 1 -2.404 -4.571 -4.956 1.00 -1.07 C

HETATM 28 C MOL A 1 -2.428 -2.282 -0.942 1.00 -2.04 C

HETATM 29 C MOL A 1 -2.387 -6.295 6.090 1.00 -1.04 C

HETATM 30 C MOL A 1 -1.947 -0.224 -1.409 1.00 -2.12 C

HETATM 31 C MOL A 1 -1.767 -0.817 -4.784 1.00 -1.75 C

HETATM 32 C MOL A 1 -1.728 4.778 4.034 1.00 -1.68 C

HETATM 33 C MOL A 1 -1.708 5.419 -3.773 1.00 -1.03 C

HETATM 34 C MOL A 1 -1.291 -2.332 -0.821 1.00 -1.99 C

HETATM 35 C MOL A 1 -1.155 -6.402 4.466 1.00 -1.06 C

HETATM 36 C MOL A 1 -1.163 1.688 0.255 1.00 -2.11 C

HETATM 37 C MOL A 1 -0.831 -2.720 -0.416 1.00 -2.01 C

HETATM 38 C MOL A 1 -0.904 2.409 5.193 1.00 -1.29 C

HETATM 39 C MOL A 1 -0.889 6.151 -0.597 1.00 -1.60 C

HETATM 40 C MOL A 1 -0.348 -3.307 2.729 1.00 -1.41 C

HETATM 41 C MOL A 1 0.110 5.073 -3.714 1.00 -1.13 C

HETATM 42 C MOL A 1 0.109 5.873 0.574 1.00 -1.55 C

HETATM 43 C MOL A 1 0.458 -6.858 -0.750 1.00 -0.80 C

HETATM 44 C MOL A 1 0.610 -1.566 -4.345 1.00 -1.75 C

HETATM 45 C MOL A 1 0.757 2.706 -6.038 1.00 -0.99 C

HETATM 46 C MOL A 1 0.844 -2.670 -0.360 1.00 -2.03 C

HETATM 47 C MOL A 1 1.169 -3.839 -3.598 1.00 -1.83 C

HETATM 48 C MOL A 1 1.154 -0.611 5.900 1.00 -1.14 C

HETATM 49 C MOL A 1 1.225 2.945 7.134 1.00 -1.05 C

HETATM 50 C MOL A 1 1.988 0.699 -0.372 1.00 -0.84 C

HETATM 51 C MOL A 1 2.599 -1.138 -0.580 1.00 -1.85 C

HETATM 52 C MOL A 1 3.078 -2.105 -3.838 1.00 -1.78 C

HETATM 53 C MOL A 1 3.773 -1.088 4.355 1.00 -1.19 C

HETATM 54 C MOL A 1 3.873 -6.241 -0.843 1.00 -0.48 C

HETATM 55 C MOL A 1 3.932 2.007 -3.191 1.00 -0.87 C

HETATM 56 C MOL A 1 4.384 1.286 5.886 1.00 -0.89 C

HETATM 57 C MOL A 1 4.725 -2.755 4.346 1.00 -1.05 C

HETATM 58 C MOL A 1 4.884 -1.289 -0.175 1.00 -1.42 C

HETATM 59 C MOL A 1 4.954 1.845 5.420 1.00 -0.91 C

HETATM 60 C MOL A 1 5.110 -1.334 0.392 1.00 -1.45 C

HETATM 61 C MOL A 1 5.109 2.288 0.702 1.00 -1.14 C

HETATM 62 C MOL A 1 5.378 -2.166 -3.513 1.00 -1.42 C

HETATM 63 C MOL A 1 6.075 3.780 2.578 1.00 -1.04 C

HETATM 64 C MOL A 1 6.551 -3.565 -3.031 1.00 -1.70 C

HETATM 65 C MOL A 1 6.793 0.342 5.106 1.00 -0.99 C

HETATM 66 C MOL A 1 6.829 3.754 -2.396 1.00 -0.93 C

HETATM 67 C MOL A 1 7.050 6.165 0.362 1.00 -0.89 C

HETATM 68 C MOL A 1 7.662 -6.850 -0.292 1.00 -0.42 C

HETATM 69 C MOL A 1 7.674 3.998 -3.383 1.00 -0.86 C

HETATM 70 C MOL A 1 8.139 6.811 -0.886 1.00 -0.80 C

HETATM 71 C MOL A 1 8.283 -2.442 3.270 1.00 -0.98 C

HETATM 72 C MOL A 1 8.442 -0.247 -2.038 1.00 -1.22 C

HETATM 73 C MOL A 1 8.708 -6.159 1.531 1.00 -0.48 C

HETATM 74 C MOL A 1 8.816 1.433 4.592 1.00 -0.89 C

HETATM 75 C MOL A 1 9.155 -6.970 -1.815 1.00 -0.46 C

HETATM 76 C MOL A 1 9.310 -1.096 3.118 1.00 -0.93 C

HETATM 77 C MOL A 1 10.189 1.765 5.006 1.00 -0.77 C

HETATM 78 C MOL A 1 11.314 5.420 -2.713 1.00 -0.70 C

HETATM 79 C MOL A 1 12.106 -5.609 0.027 1.00 -0.70 C

HETATM 80 C MOL A 1 12.605 4.251 -1.721 1.00 -0.71 C

HETATM 81 C MOL A 1 12.956 0.572 2.709 1.00 -0.77 C

HETATM 82 C MOL A 1 13.486 1.792 1.154 1.00 -0.75 C

HETATM 1 O MOL A 1 -8.996 -0.748 -0.278 1.00 -3.26 O

HETATM 2 O MOL A 1 -8.848 3.635 1.573 1.00 -4.82 O

HETATM 3 O MOL A 1 -8.432 0.121 -3.857 1.00 -2.35 O

HETATM 4 O MOL A 1 -8.288 3.754 -3.861 1.00 -2.32 O

HETATM 5 O MOL A 1 -7.053 1.452 0.088 1.00 -3.68 O

HETATM 6 O MOL A 1 -6.881 -2.873 -3.823 1.00 -2.08 O

HETATM 7 O MOL A 1 -5.769 -1.648 -0.220 1.00 -2.36 O

HETATM 8 O MOL A 1 -5.555 -5.178 3.835 1.00 -2.48 O

HETATM 9 O MOL A 1 -5.516 4.210 -1.731 1.00 -3.34 O

HETATM 10 O MOL A 1 -4.756 1.531 4.038 1.00 -2.42 O

HETATM 11 O MOL A 1 -4.444 2.760 3.835 1.00 -2.41 O

HETATM 12 O MOL A 1 -3.847 -2.200 4.867 1.00 -2.63 O

HETATM 13 O MOL A 1 -3.869 0.967 -5.328 1.00 -1.96 O

HETATM 14 O MOL A 1 -3.733 -2.244 -0.496 1.00 -2.37 O

HETATM 15 O MOL A 1 -3.523 1.207 0.735 1.00 -2.47 O

HETATM 16 O MOL A 1 -3.462 1.209 -1.422 1.00 -2.30 O

HETATM 17 O MOL A 1 -2.809 2.568 -5.363 1.00 -1.99 O

HETATM 18 O MOL A 1 -2.335 0.741 -5.287 1.00 -1.95 O

HETATM 19 O MOL A 1 -2.242 -4.415 -0.262 1.00 -2.54 O

HETATM 20 O MOL A 1 -2.022 -1.048 -1.045 1.00 -2.23 O

HETATM 21 O MOL A 1 -1.625 -4.343 1.057 1.00 -1.77 O

HETATM 22 O MOL A 1 -1.378 5.827 1.938 1.00 -1.97 O

HETATM 23 O MOL A 1 -0.928 -1.492 -4.844 1.00 -1.84 O

HETATM 24 O MOL A 1 -0.648 1.873 -1.152 1.00 -2.79 O

HETATM 25 O MOL A 1 0.045 -1.799 -0.530 1.00 -2.11 O

HETATM 26 O MOL A 1 0.192 0.881 2.165 1.00 -2.53 O

HETATM 27 O MOL A 1 0.652 -0.460 -4.854 1.00 -1.93 O

HETATM 28 O MOL A 1 1.082 -3.288 0.115 1.00 -2.12 O

HETATM 29 O MOL A 1 1.140 4.050 -1.170 1.00 -2.95 O

HETATM 30 O MOL A 1 1.172 4.550 3.443 1.00 -2.40 O

HETATM 31 O MOL A 1 1.566 -4.662 -3.468 1.00 -1.93 O

HETATM 32 O MOL A 1 2.130 -3.219 -3.914 1.00 -1.90 O

HETATM 33 O MOL A 1 2.512 5.037 1.938 1.00 -2.28 O

HETATM 34 O MOL A 1 2.702 -0.572 -0.530 1.00 -1.90 O

HETATM 35 O MOL A 1 2.994 -0.998 -4.400 1.00 -1.93 O

HETATM 36 O MOL A 1 4.174 -1.955 1.857 1.00 -1.64 O

HETATM 37 O MOL A 1 5.026 -0.857 4.446 1.00 -1.25 O

HETATM 38 O MOL A 1 5.152 3.912 -0.183 1.00 -1.48 O

HETATM 39 O MOL A 1 6.007 -3.699 0.834 1.00 -1.81 O

HETATM 40 O MOL A 1 6.300 0.624 -2.125 1.00 -2.25 O

HETATM 41 O MOL A 1 6.377 -4.427 -3.013 1.00 -1.79 O

HETATM 42 O MOL A 1 6.590 -2.478 4.351 1.00 -1.32 O

HETATM 43 O MOL A 1 6.853 -0.533 -0.167 1.00 -1.71 O

HETATM 44 O MOL A 1 7.416 -2.282 0.725 1.00 -1.81 O

HETATM 45 O MOL A 1 7.562 -3.238 -3.183 1.00 -1.78 O

HETATM 46 O MOL A 1 10.187 1.100 -0.486 1.00 -2.28 O

HETATM 47 O MOL A 1 10.424 4.207 1.608 1.00 -2.04 O

HETATM 48 O MOL A 1 10.664 -1.195 -1.093 1.00 -2.90 O

END
